# Supplementary material for: New steroid saponins from Dioscorea zingiberensis yam and their medicinal use against I/R via anti-inflammatory effect
Source: Royal Society of Chemistry journal article supplement (doi:10.1039/d1fo01301g), 2021-01-01
Supplement: d1fo01301g1.pdf [file d1fo01301g1.pdf]

Figure S1: The separation flow chart of obtained steroid saponins from *Dioscorea zingiberensis* C. H. Wright by different chromatography. When the compound is purified with HPLC, M:W represents the solvent system of acetonitrile and water, while no abbreviation of M:W represents the solvent system of methanol and water. The red numbers indicate the new steroid saponins.

Figure S2: The structural identification data of **Dioscin A** (Compound 1). (a): HR-ESI-MS, positive ion mode; (b): UV; 190 nm-400 nm; (c): IR, 4000-0  $\text{cm}^{-1}$ ; (d):  $^1\text{H}$ -NMR; (e):  $^{13}\text{C}$ -NMR; (f): DEPT; (g): HSQC; (h): HMBC; (i):  $^1\text{H}$ - $^1\text{H}$  COSY; (j): NOESY; (k): HSQC-TOCSY; (l): The GC chromatography of D-Glu and L-Rha. The sugar separation was performed on a SE-30 capillary column (30 m  $\times$  0.32 mm, 0.25  $\mu\text{m}$ ), the temperatures of column, injection, and FID detector were set as 220  $^{\circ}\text{C}$ , 230  $^{\circ}\text{C}$ , and 240  $^{\circ}\text{C}$ , respectively. The retention time of D-Glu was 20.36 min.

Figure S3: The structural identification data of **Dioscin B** (Compound 2). (a): HR-ESI-MS, positive ion mode; (b): UV; 190 nm-400 nm; (c): IR, 4000-0  $\text{cm}^{-1}$ ; (d):  $^1\text{H}$ -NMR; (e):  $^{13}\text{C}$ -NMR; (f): DEPT; (g): HSQC; (h): HMBC; (i):  $^1\text{H}$ - $^1\text{H}$  COSY; (j): NOESY; (k): HSQC-TOCSY; (l): The GC chromatography of D-Glu and L-Rha. The sugar separation was performed on a SE-30 capillary column (30 m  $\times$  0.32 mm, 0.25  $\mu\text{m}$ ), the temperatures of column, injection, and FID detector were set as 220  $^{\circ}\text{C}$ , 230  $^{\circ}\text{C}$ , and 240  $^{\circ}\text{C}$ , respectively. The retention time of D-Glu was 20.36 min.

Figure S4: The structural identification data of **Dioscin C** (Compound **3**). (a): HR-ESI-MS, positive ion mode; (b): UV; 190 nm-400 nm; (c): IR, 4000-0  $\text{cm}^{-1}$ ; (d):  $^1\text{H}$ -NMR; (e):  $^{13}\text{C}$ -NMR; (f): DEPT; (g): HSQC; (h): HMBC; (i):  $^1\text{H}$ - $^1\text{H}$  COSY; (j): NOESY; (k): HSQC-TOCSY; (l): The GC chromatography of D-Glu and L-Rha. The sugar separation was performed on a SE-30 capillary column (30 m  $\times$  0.32 mm, 0.25  $\mu\text{m}$ ), the temperatures of column, injection, and FID detector were set as 220  $^\circ\text{C}$ , 230  $^\circ\text{C}$ , and 240  $^\circ\text{C}$ , respectively. The retention time of L-Rha and D-Glu was separately 13.92 min and 20.36 min.

Figure S5: The structural identification data of **Dioscin D** (Compound **4**). (a): HR-ESI-MS, positive ion mode; (b): UV; 190 nm-400 nm; (c): IR, 4000-0  $\text{cm}^{-1}$ ; (d):  $^1\text{H}$ -NMR; (e):  $^{13}\text{C}$ -NMR; (f): DEPT; (g): HSQC; (h): HMBC; (i):  $^1\text{H}$ - $^1\text{H}$  COSY; (j): NOESY; (k): HSQC-TOCSY; (l): The GC chromatography of D-Glu and L-Rha. The sugar separation was performed on a SE-30 capillary column (30 m  $\times$  0.32 mm, 0.25  $\mu\text{m}$ ), the temperatures of column, injection, and FID detector were set as 220  $^\circ\text{C}$ , 230  $^\circ\text{C}$ , and 240  $^\circ\text{C}$ , respectively. The retention time of D-Glu was 20.36 min.

Figure S6: The structural identification data of **Dioscin E** (Compound **5**). (a): HR-ESI-MS, positive ion mode; (b): UV; 190 nm-400 nm; (c): IR, 4000-0  $\text{cm}^{-1}$ ; (d):  $^1\text{H}$ -NMR; (e):  $^{13}\text{C}$ -NMR; (f): DEPT; (g): HSQC; (h): HMBC; (i):  $^1\text{H}$ - $^1\text{H}$  COSY; (j): NOESY; (k): HSQC-TOCSY; (l): The GC chromatography of D-Glu and L-Rha. The sugar separation was performed on a SE-30 capillary column (30 m  $\times$  0.32 mm, 0.25

$\mu\text{m}$ ), the temperatures of column, injection, and FID detector were set as 220 °C, 230 °C, and 240 °C, respectively. The retention time of D-Glu was 20.36 min.

Figure S7: The structural identification data of **Dioscin F** (Compound **6**). (a): HR-ESI-MS, positive ion mode; (b): UV; 190 nm-400 nm; (c): IR, 4000-0  $\text{cm}^{-1}$ ; (d):  $^1\text{H}$ -NMR; (e):  $^{13}\text{C}$ -NMR; (f): DEPT; (g): HSQC; (h): HMBC; (i):  $^1\text{H}$ - $^1\text{H}$  COSY; (j): NOESY; (k): HSQC-TOCSY; (l): The GC chromatography of D-Glu and L-Rha. The sugar separation was performed on a SE-30 capillary column (30 m  $\times$  0.32 mm, 0.25  $\mu\text{m}$ ), the temperatures of column, injection, and FID detector were set as 220 °C, 230 °C, and 240 °C, respectively. The retention time of D-Glu was 20.36 min.

Figure S8: The structural identification data of **Dioscin G** (Compound **7**). (a): HR-ESI-MS, positive ion mode; (b): UV; 190 nm-400 nm; (c): IR, 4000-0  $\text{cm}^{-1}$ ; (d):  $^1\text{H}$ -NMR; (e):  $^{13}\text{C}$ -NMR; (f): DEPT; (g): HSQC; (h): HMBC; (i):  $^1\text{H}$ - $^1\text{H}$  COSY; (j): NOESY; (k): HSQC-TOCSY; (l): The GC chromatography of D-Glu and L-Rha. The sugar separation was performed on a SE-30 capillary column (30 m  $\times$  0.32 mm, 0.25  $\mu\text{m}$ ), the temperatures of column, injection, and FID detector were set as 220 °C, 230 °C, and 240 °C, respectively. The retention time of L-Rha and D-Glu was separately 13.87 min and 20.25 min.

Figure S9: The structural identification data of **Dioscin H** (Compound **8**). (a): HR-ESI-MS, positive ion mode; (b): UV; 190 nm-400 nm; (c): IR, 4000-0  $\text{cm}^{-1}$ ; (d):  $^1\text{H}$ -

NMR; (e):  $^{13}\text{C}$ -NMR; (f): DEPT; (g): HSQC; (h): HMBC; (i):  $^1\text{H}$ - $^1\text{H}$  COSY; (j): NOESY; (k): HSQC-TOCSY; (l): The GC chromatography of D-Glu and L-Rha. The sugar separation was performed on a SE-30 capillary column (30 m  $\times$  0.32 mm, 0.25  $\mu\text{m}$ ), the temperatures of column, injection, and FID detector were set as 220  $^{\circ}\text{C}$ , 230  $^{\circ}\text{C}$ , and 240  $^{\circ}\text{C}$ , respectively. The retention time of D-Glu was 20.36 min.

Figure S10: The structural identification data of **Dioscin I** (Compound **9**). (a): HR-ESI-MS, positive ion mode; (b): UV; 190 nm-400 nm; (c): IR, 4000-0  $\text{cm}^{-1}$ ; (d):  $^1\text{H}$ -NMR; (e):  $^{13}\text{C}$ -NMR; (f): DEPT; (g): HSQC; (h): HMBC; (i):  $^1\text{H}$ - $^1\text{H}$  COSY; (j): NOESY; (k): HSQC-TOCSY; (l): The GC chromatography of D-Glu and L-Rha. The sugar separation was performed on a SE-30 capillary column (30 m  $\times$  0.32 mm, 0.25  $\mu\text{m}$ ), the temperatures of column, injection, and FID detector were set as 220  $^{\circ}\text{C}$ , 230  $^{\circ}\text{C}$ , and 240  $^{\circ}\text{C}$ , respectively. The retention time of D-Glu was 20.36 min.

Figure S11: The representative membrane protein blots of anti-inflammatory and anti-I/R effects on rats (a), RAW 264.7 (b), and PC12 (c) *in vivo* and *in vitro*, respectively, of n-butanol extracts and obtained Compound **1**, **2**, and **7**. (i) NF- $\kappa\text{B}$  of n-butanol extracts; (ii)  $\beta$ -actin of n-butanol extracts; (I) NF- $\kappa\text{B}$  of Compound **1**; (II)  $\beta$ -actin of Compound **1**; (III) NF- $\kappa\text{B}$  of Compound **2**; (IV)  $\beta$ -actin of Compound **2**; (V) NF- $\kappa\text{B}$  of Compound **7**; (VI)  $\beta$ -actin of Compound **7**
