# Supplementary material for: New steroid saponins from Dioscorea zingiberensis yam and their medicinal use against I/R via anti-inflammatory effect
Source: Royal Society of Chemistry journal article supplement (doi:10.1039/d1fo01301g), 2021-01-01

n-BuOH fraction

Silicon gel (100-200 mesh)  
CH<sub>2</sub>Cl<sub>2</sub>:CH<sub>3</sub>OH:H<sub>2</sub>O

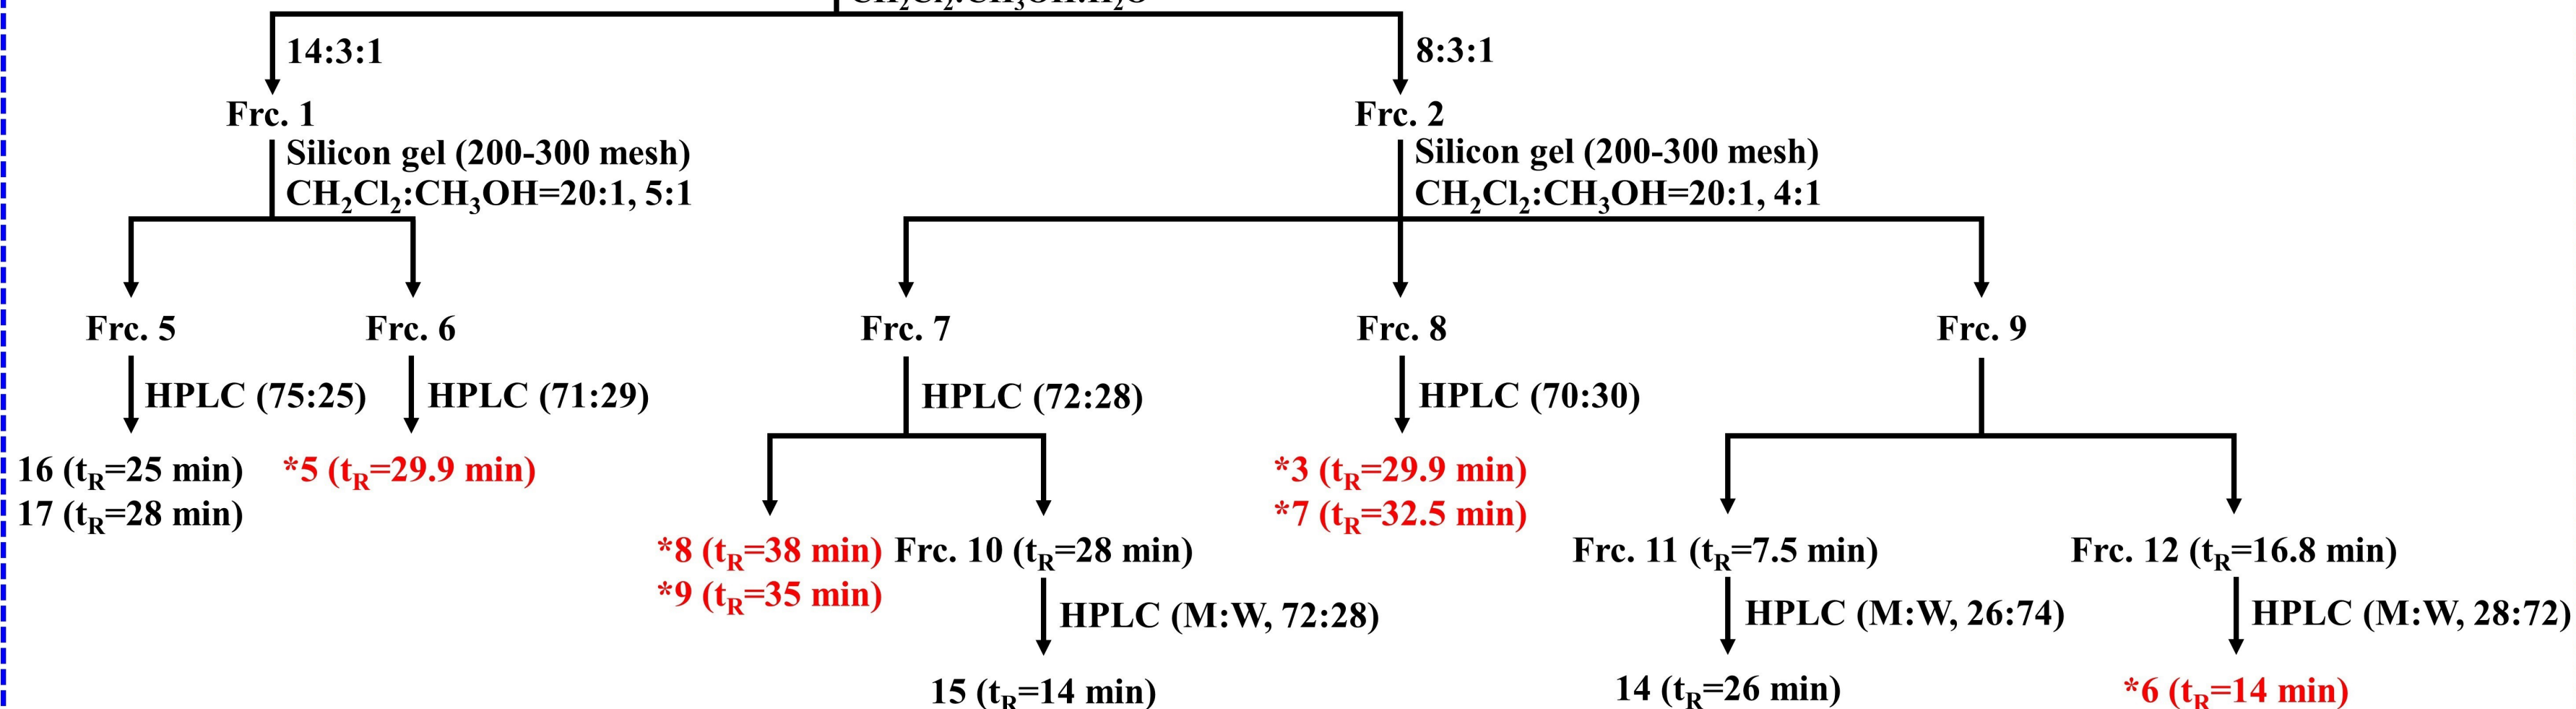

n-BuOH fraction

Silicon gel (100-200 mesh)  
CH<sub>2</sub>Cl<sub>2</sub>:CH<sub>3</sub>OH:H<sub>2</sub>O

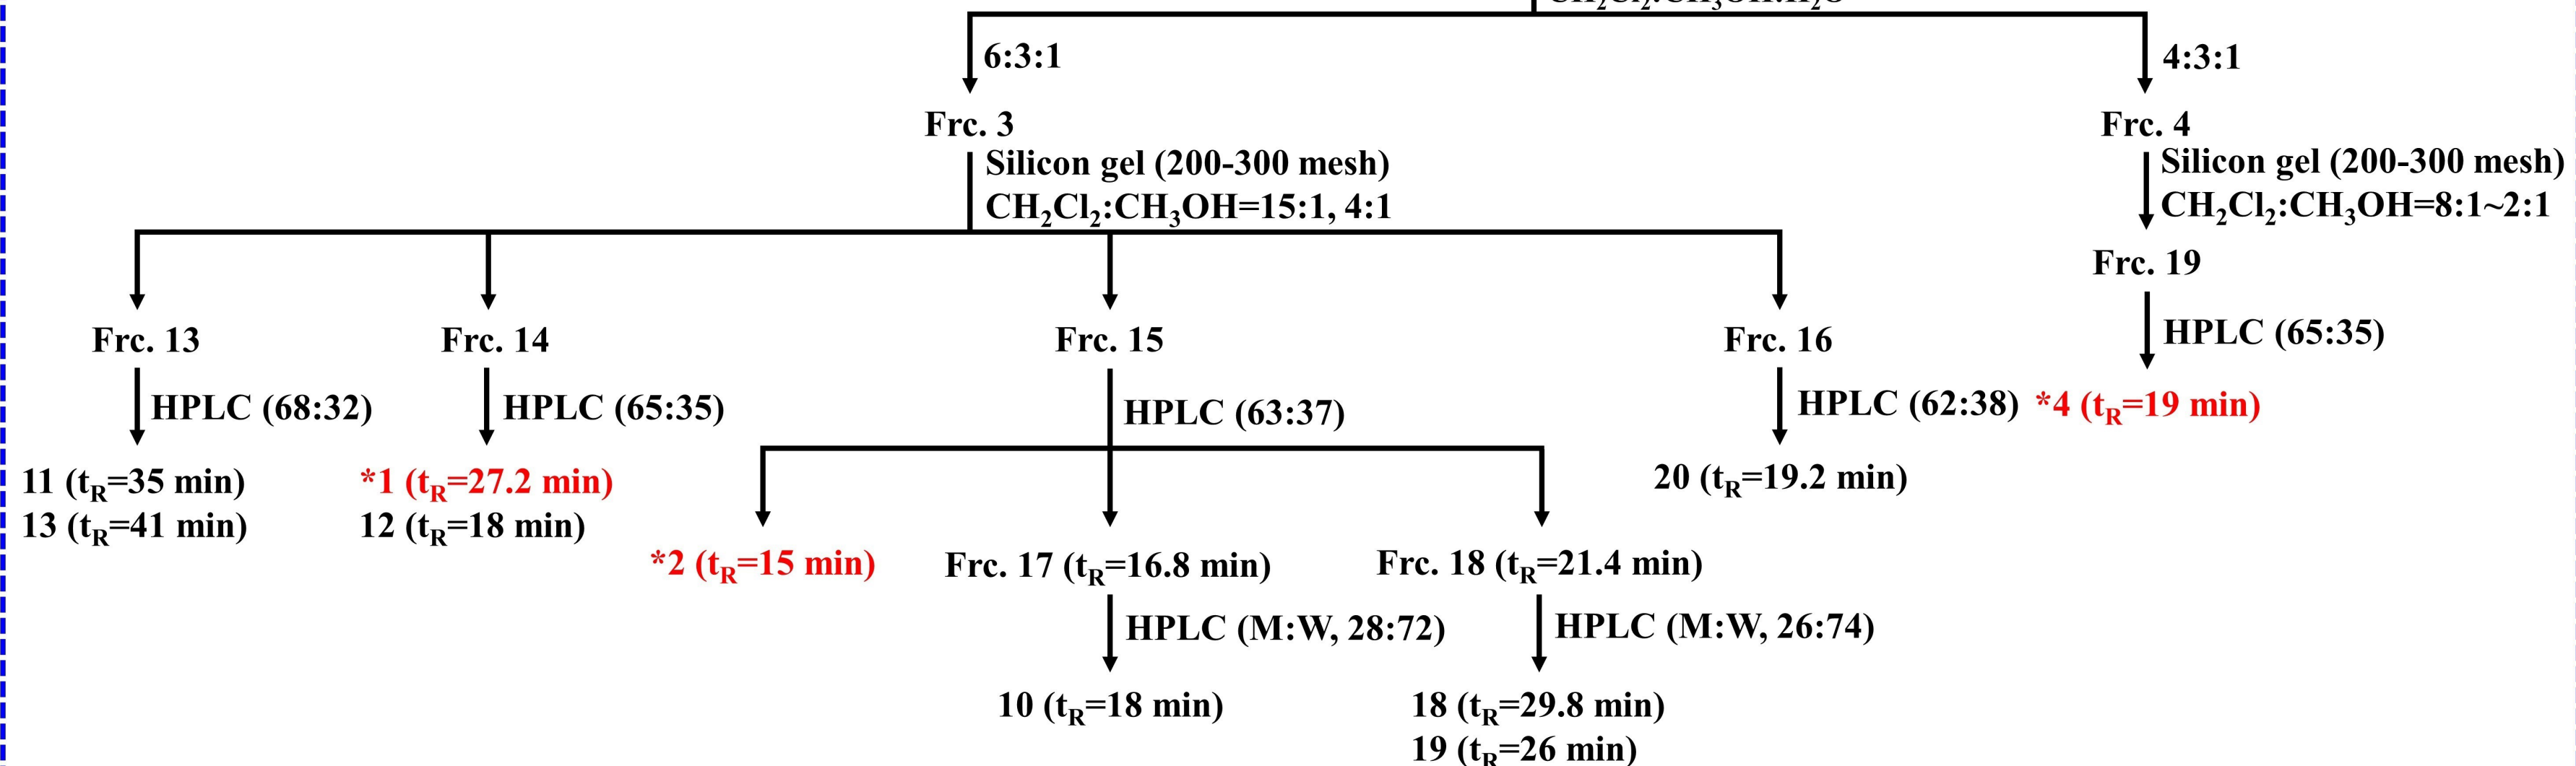

Supplement: d1fo01301g2.pdf [file d1fo01301g2.pdf]
