# Supplementary material for: New steroid saponins from Dioscorea zingiberensis yam and their medicinal use against I/R via anti-inflammatory effect
Source: Royal Society of Chemistry journal article supplement (doi:10.1039/d1fo01301g), 2021-01-01
Supplement: d1fo01301g13.pdf [file d1fo01301g13.pdf]

The chemical shift assignments of carbon and proton signals of **Dioscin A**  
 (Compound **1**) in Pyridine-*d*<sub>5</sub>.

| Carbon NO.        | Dioscin A        |                                                                                                  |
|-------------------|------------------|--------------------------------------------------------------------------------------------------|
|                   | $\delta_C$ (ppm) | $\delta_C$ (ppm, <i>J</i> in Hz)                                                                 |
| 1                 | 37.36            | 1.67 (H <sub>2</sub> -1, m)                                                                      |
| 2                 | 30.11            | 2.07 (H <sub>2</sub> -2, m)                                                                      |
| 3                 | 78.18            | 3.87 (H <sub>1</sub> -3, m)                                                                      |
| 4                 | 39.21            | 2.44 (H <sub>1</sub> -4a, t, <i>J</i> =12.2 Hz), 2.68 (H <sub>1</sub> -4b, d, <i>J</i> =13.4 Hz) |
| 5                 | 140.81           |                                                                                                  |
| 6                 | 121.66           | 5.30 (H <sub>1</sub> -6, d, <i>J</i> =4.18 Hz)                                                   |
| 7                 | 32.17            | 1.84 (H <sub>1</sub> -7a, m), 1.94 (H <sub>1</sub> -7b, m)                                       |
| 8                 | 31.52            | 1.50 (H <sub>1</sub> -8, m)                                                                      |
| 9                 | 50.18            | 0.86 (H <sub>1</sub> -9, m)                                                                      |
| 10                | 39.65            |                                                                                                  |
| 11                | 20.96            | 1.41 (H <sub>2</sub> -11, m)                                                                     |
| 12                | 36.95            | 1.69 (H <sub>2</sub> -12, m)                                                                     |
| 13                | 40.42            |                                                                                                  |
| 14                | 56.48            | 1.35 (H <sub>1</sub> -14, m)                                                                     |
| 15                | 32.07            | 1.36 (H <sub>1</sub> -15a, m), 1.94 (H <sub>1</sub> -15b, m)                                     |
| 16                | 81.22            | 4.43 (H <sub>1</sub> -16, m)                                                                     |
| 17                | 64.11            | 1.73 (H <sub>1</sub> -17, m)                                                                     |
| 18                | 19.31            | 0.89 (H <sub>3</sub> -18, s)                                                                     |
| 19                | 16.24            | 0.8 (H <sub>3</sub> -19, s)                                                                      |
| 20                | 40.7             | 2.20 (H <sub>1</sub> -20, dd, <i>J</i> =6.2, 12.7 Hz)                                            |
| 21                | 16.20            | 1.18 (H <sub>3</sub> -21, d, <i>J</i> =6.8 Hz)                                                   |
| 22                | 112.58           |                                                                                                  |
| 23                | 30.73            | 1.73 (H <sub>1</sub> -23a, m), 1.99 (H <sub>1</sub> -23b, m)                                     |
| 24                | 28.11            | 1.32 (H <sub>1</sub> -24a, m), 1.79 (H <sub>1</sub> -24b, m)                                     |
| 25                | 34.14            | 1.88 (H <sub>1</sub> -25, m)                                                                     |
| 26                | 75.13            | 3.96 (H <sub>1</sub> -26a, m), 3.59 (H <sub>1</sub> -26b, m)                                     |
| 27                | 17.06            | 0.99 (H <sub>3</sub> -27, d, <i>J</i> =6.6 Hz)                                                   |
| -OCH <sub>3</sub> | 47.2             | 3.25 (3H, s)                                                                                     |
| 3-O-Glc-1'        | 102.22           | 4.99 (1H, d, <i>J</i> =7.7 Hz)                                                                   |
| 2'                | 74.79            | 4.04 (1H, m)                                                                                     |
| 3'                | 76.77            | 3.93 (1H, m)                                                                                     |
| 4'                | 81.22            | 4.37 (1H, m)                                                                                     |
| 5'                | 76.79            | 4.32 (1H, m)                                                                                     |
| 6'                | 62.82            | 4.39 (1H, m), 4.55 (1H, m)                                                                       |
| Glc(1→4)1''       | 104.94           | 5.22 (1H, d, <i>J</i> =7.8 Hz)                                                                   |
| 2''               | 71.67            | 4.21 (1H, m)                                                                                     |
| 3''               | 75.13            | 4.04 (1H, m)                                                                                     |
| 4''               | 74.72            | 4.12 (1H, m)                                                                                     |
| 5''               | 78.58            | 4.23 (1H, m)                                                                                     |
| 6''               | 62.1             | 4.48 (1H, m), 4.55 (1H, m)                                                                       |

|               |        |                            |
|---------------|--------|----------------------------|
| 26-O-Glc-1''' | 104.94 | 4.84 (1H, d, $J=7.7$ Hz)   |
| 2'''          | 74.72  | 4.12 (1H, m)               |
| 3'''          | 78.18  | 4.23 (1H, m)               |
| 4'''          | 71.67  | 4.21 (1H, m)               |
| 5'''          | 78.48  | 4.01 (1H, m)               |
| 6'''          | 62.38  | 4.30 (1H, m), 4.55 (1H, m) |

The chemical shift assignments of carbon and proton signals of **Dioscin B** (Compound **2**) in Pyridine- $d_5$ .

| Carbon NO.        | Dioscin B        |                                                                                    |
|-------------------|------------------|------------------------------------------------------------------------------------|
|                   | $\delta_C$ (ppm) | $\delta_C$ (ppm, $J$ in Hz)                                                        |
| 1                 | 37.36            | 1.67 (H <sub>2</sub> -1, m)                                                        |
| 2                 | 30.12            | 2.07 (H <sub>2</sub> -2, m)                                                        |
| 3                 | 78.42            | 3.87 (H <sub>1</sub> -3, m)                                                        |
| 4                 | 39.22            | 2.44 (H <sub>1</sub> -4a, t, $J=12.2$ ), 2.68 (H <sub>1</sub> -4b, d, $J=13.4$ Hz) |
| 5                 | 140.82           |                                                                                    |
| 6                 | 121.67           | 5.30 (H <sub>1</sub> -6, d, $J=4.18$ Hz)                                           |
| 7                 | 32.17            | 1.84 (H <sub>1</sub> -7a, m), 1.94 (H <sub>1</sub> -7b, m)                         |
| 8                 | 31.52            | 1.50 (H <sub>1</sub> -8, m)                                                        |
| 9                 | 50.19            | 0.86 (H <sub>1</sub> -9, m)                                                        |
| 10                | 39.66            |                                                                                    |
| 11                | 20.97            | 1.41 (H <sub>2</sub> -11, m)                                                       |
| 12                | 36.96            | 1.72 (H <sub>2</sub> -12, m)                                                       |
| 13                | 40.43            |                                                                                    |
| 14                | 56.48            | 1.35 (H <sub>1</sub> -14, m)                                                       |
| 15                | 32.07            | 1.36 (H <sub>1</sub> -15a, m), 1.94 (H <sub>1</sub> -15b, m)                       |
| 16                | 81.22            | 4.43 (H <sub>1</sub> -16, m)                                                       |
| 17                | 64.11            | 1.73 (H <sub>1</sub> -17, m)                                                       |
| 18                | 16.2             | 0.8 (H <sub>3</sub> -18, s)                                                        |
| 19                | 19.31            | 0.89 (H <sub>3</sub> -19, s)                                                       |
| 20                | 40.71            | 2.20 (H <sub>1</sub> -20, dd, $J=6.2$ Hz, 12.7 Hz)                                 |
| 21                | 16.25            | 1.18 (H <sub>3</sub> -21, d, $J=6.8$ Hz)                                           |
| 22                | 112.58           |                                                                                    |
| 23                | 30.74            | 1.73 (H <sub>1</sub> -23a, m), 1.99 (H <sub>1</sub> -23b, m)                       |
| 24                | 28.11            | 1.32 (H <sub>1</sub> -24a, m), 1.79 (H <sub>1</sub> -24b, m)                       |
| 25                | 34.15            | 1.88 (H <sub>1</sub> -25, m)                                                       |
| 26                | 76.4             | 3.94 (H <sub>1</sub> -26a, m), 4.04 (H <sub>1</sub> -26b, m)                       |
| 27                | 17.06            | 0.99 (H <sub>3</sub> -27, d, $J=6.6$ Hz)                                           |
| -OCH <sub>3</sub> | 47.2             | 3.25 (3H, s)                                                                       |
| 3-O-Glu-1'        | 102.23           | 4.99 (1H, d, $J=7.7$ Hz)                                                           |
| 2'                | 78.59            | 4.37 (1H, m)                                                                       |
| 3'                | 76.8             | 3.93 (1H, m)                                                                       |
| 4'                | 75.14            | 4.04 (1H, m)                                                                       |

|               |        |                            |
|---------------|--------|----------------------------|
| 5'            | 78.18  | 4.32 (1H, m)               |
| 6'            | 62.82  | 4.39 (1H, m), 4.55 (1H, m) |
| Glu(1→2)1''   | 104.95 | 5.22 (1H, d, $J=7.8$ Hz)   |
| 2''           | 71.68  | 4.21 (1H, m)               |
| 3''           | 75.14  | 4.04 (1H, m)               |
| 4''           | 74.81  | 4.12 (1H, m)               |
| 5''           | 78.59  | 4.23 (1H, m)               |
| 6''           | 62.1   | 4.48 (1H, m), 4.55 (1H, m) |
| 26-O-Glu-1''' | 104.95 | 4.84 (1H, d, $J=7.7$ Hz)   |
| 2'''          | 74.73  | 4.12 (1H, m)               |
| 3'''          | 78.18  | 4.23 (1H, m)               |
| 4'''          | 71.45  | 4.21 (1H, m)               |
| 5'''          | 78.49  | 4.01 (1H, m)               |
| 6'''          | 62.38  | 4.30 (1H, m), 4.55 (1H, m) |

The chemical shift assignments of carbon and proton signals of **Dioscin C** (Compound **3**) in Pyridine- $d_5$ .

| Carbon NO. | Dioscin C        |                                                              |
|------------|------------------|--------------------------------------------------------------|
|            | $\delta_C$ (ppm) | $\delta_C$ (ppm, $J$ in Hz)                                  |
| 1          | 37.37            | 1.68 (H <sub>2</sub> -1, m)                                  |
| 2          | 30.07            | 2.09 (H <sub>2</sub> -2, m)                                  |
| 3          | 78.05            | 4.26 (H <sub>1</sub> -3, m)                                  |
| 4          | 38.85            | 2.72 (H <sub>2</sub> -4, m)                                  |
| 5          | 140.66           |                                                              |
| 6          | 121.76           | 5.27 (H <sub>1</sub> -6, br.s)                               |
| 7          | 32.4             | 1.86 (H <sub>1</sub> -7a, m), 2.02 (H <sub>1</sub> -7b, m)   |
| 8          | 31.6             | 1.45 (H <sub>1</sub> -8, m)                                  |
| 9          | 50.25            | 0.90 (H <sub>1</sub> -9, m)                                  |
| 10         | 39.85            |                                                              |
| 11         | 21.02            | 1.45 (H <sub>2</sub> -11, m)                                 |
| 12         | 37.13            | 2.02 (H <sub>2</sub> -12, m)                                 |
| 13         | 40.7             |                                                              |
| 14         | 57.28            | 1.11 (H <sub>1</sub> -14, m)                                 |
| 15         | 32.24            | 1.45 (H <sub>1</sub> -15a, m), 2.02 (H <sub>1</sub> -15b, m) |
| 16         | 81.03            | 4.95 (H <sub>1</sub> -16, m)                                 |
| 17         | 63.77            | 1.92 (H <sub>1</sub> -17, m)                                 |
| 18         | 17.39            | 0.89 (H <sub>3</sub> -18, s)                                 |
| 19         | 19.13            | 1.03 (H <sub>3</sub> -19, s)                                 |
| 20         | 40.6             | 2.23 (H <sub>1</sub> -20, m)                                 |
| 21         | 16.38            | 1.31 (H <sub>3</sub> -21, d, $J=6.4$ Hz)                     |
| 22         | 110.57           |                                                              |
| 23         | 37.04            | 1.75 (H <sub>1</sub> -23a, m), 2.02 (H <sub>1</sub> -23b, m) |
| 24         | 28.28            | 1.67 (H <sub>1</sub> -24a, m), 2.02 (H <sub>1</sub> -24b, m) |

|                |        |                                                              |
|----------------|--------|--------------------------------------------------------------|
| 25             | 34.21  | 1.92 (H <sub>1</sub> -25, m)                                 |
| 26             | 75.19  | 3.61 (H <sub>1</sub> -26a, m), 3.95 (H <sub>1</sub> -26b, m) |
| 27             | 18.59  | 0.98 (H <sub>3</sub> -27, d, <i>J</i> =6.5 Hz)               |
| 3-O-Glc-1'     | 99.91  | 4.95 (1H, d, <i>J</i> =7.2 Hz)                               |
| 2'             | 77.66  | 4.26 (1H, m)                                                 |
| 3'             | 76.12  | 4.26 (1H, m)                                                 |
| 4'             | 81.97  | 4.26 (1H, m)                                                 |
| 5'             | 77.18  | 4.26 (1H, m)                                                 |
| 6'             | 61.99  | 4.35 (1H, m), 4.56 (1H, m)                                   |
| Glc(1→4)1''    | 105.15 | 6.4 (1H, d, <i>J</i> =7.3 Hz)                                |
| 2''            | 74.89  | 4.04 (1H, m)                                                 |
| 3''            | 78.42  | 4.26 (1H, m)                                                 |
| 4''            | 81.96  | 4.26 (1H, m)                                                 |
| 5''            | 78.24  | 3.95 (1H, m)                                                 |
| 6''            | 61.84  | 4.46 (1H, m), 4.56 (1H, m)                                   |
| Rha(1→4)1'''   | 101.74 | 6.26 (1H, br.s)                                              |
| 2'''           | 72.39  | 4.74 (1H, m)                                                 |
| 3'''           | 72.7   | 4.56 (1H, m)                                                 |
| 4'''           | 74.05  | 4.35 (1H, m)                                                 |
| 5'''           | 69.4   | 4.95 (1H, m)                                                 |
| 6'''           | 19.31  | 1.75 (3H, d, <i>J</i> =5.67 Hz)                              |
| 26-O-Glc-1'''' | 104.87 | 4.82 (1H, d, <i>J</i> =7.6 Hz)                               |
| 2''''          | 75.12  | 4.04 (1H, m)                                                 |
| 3''''          | 78.53  | 4.26 (1H, m)                                                 |
| 4''''          | 71.6   | 4.26 (1H, m)                                                 |
| 5''''          | 78.21  | 4.26 (1H, m)                                                 |
| 6''''          | 62.73  | 4.35 (1H, m), 4.56 (1H, m)                                   |
