# Supplementary material for: New steroid saponins from Dioscorea zingiberensis yam and their medicinal use against I/R via anti-inflammatory effect
Source: Royal Society of Chemistry journal article supplement (doi:10.1039/d1fo01301g), 2021-01-01
Supplement: d1fo01301g14.pdf [file d1fo01301g14.pdf]

The chemical shift assignments of carbon and proton signals of **Dioscin D**  
 (Compound **4**) in Pyridine-*d*<sub>5</sub>.

| Carbon NO.    | Dioscin D        |                                                              |
|---------------|------------------|--------------------------------------------------------------|
|               | $\delta_C$ (ppm) | $\delta_C$ (ppm)                                             |
| 1             | 37.42            | 1.73 (H <sub>2</sub> -1, m)                                  |
| 2             | 30.08            | 2.09 (H <sub>2</sub> -2, m)                                  |
| 3             | 78.04            | 3.87 (H <sub>1</sub> -3, m)                                  |
| 4             | 38.86            | 2.73 (H <sub>1</sub> -4, m)                                  |
| 5             | 140.67           |                                                              |
| 6             | 121.77           | 5.27 (H <sub>1</sub> -6, br.s)                               |
| 7             | 32.26            | 1.86 (H <sub>1</sub> -7a, m), 2.03 (H <sub>1</sub> -7b, m)   |
| 8             | 31.59            | 1.55 (H <sub>1</sub> -8, m)                                  |
| 9             | 50.26            | 0.91 (H <sub>1</sub> -9, m)                                  |
| 10            | 40.62            |                                                              |
| 11            | 21.03            | 1.46 (H <sub>2</sub> -11, m)                                 |
| 12            | 37.05            | 2.03 (H <sub>2</sub> -12, m)                                 |
| 13            | 39.84            |                                                              |
| 14            | 56.5             | 1.11 (H <sub>1</sub> -14, m)                                 |
| 15            | 32.41            | 2.03 (H <sub>2</sub> -15, m)                                 |
| 16            | 81.98            | 4.23 (H <sub>1</sub> -16, m)                                 |
| 17            | 63.79            | 1.92 (H <sub>1</sub> -17, m)                                 |
| 18            | 16.4             | 0.89 (H <sub>3</sub> -18, s)                                 |
| 19            | 19.32            | 1.05 (H <sub>3</sub> -19, s)                                 |
| 20            | 40.71            | 2.23 (H <sub>1</sub> -20, dd, <i>J</i> =6.8 Hz, 13.4 Hz)     |
| 21            | 16.4             | 1.34 (H <sub>3</sub> -21, d, <i>J</i> =6.8 Hz)               |
| 22            | 110.58           |                                                              |
| 23            | 37.15            | 1.73 (H <sub>1</sub> -23a, m), 2.03 (H <sub>1</sub> -23b, m) |
| 24            | 28.30            | 1.68 (H-24a, m), 2.03 (H-24b, m)                             |
| 25            | 34.22            | 1.92 (H <sub>1</sub> -25, m)                                 |
| 26            | 75.21            | 3.61 (H <sub>1</sub> -26a, m), 4.23 (H <sub>1</sub> -26b, m) |
| 27            | 17.41            | 0.98 (H <sub>3</sub> -27, d, <i>J</i> =6.7 Hz)               |
| 3-O-Glu-1'    | 99.91            | 4.96 (1H, d, <i>J</i> =7.2 Hz)                               |
| 2'            | 74.91            | 4.35 (1H, m)                                                 |
| 3'            | 77.18            | 4.23 (1H, m)                                                 |
| 4'            | 81.03            | 4.94 (1H, m)                                                 |
| 5'            | 78.23            | 4.29 (1H, m)                                                 |
| 6'            | 61.84            | 4.35 (1H, m), 4.56 (1H, m)                                   |
| Glu(1→4)1''   | 105.19           | 5.14 (1H, d, <i>J</i> =7.9 Hz)                               |
| 2''           | 78.56            | 4.23 (1H, m)                                                 |
| 3''           | 77.68            | 4.23 (1H, m)                                                 |
| 4''           | 72.7             | 4.56 (1H, m)                                                 |
| 5''           | 78.44            | 4.23 (1H, m)                                                 |
| 6''           | 61.99            | 4.35 (1H, m), 4.40 (1H, m)                                   |
| Rha(1→2) 1''' | 101.75           | 6.27 (1H, br.s)                                              |

|                |        |                            |
|----------------|--------|----------------------------|
| 2'''           | 71.12  | 4.29 (1H, m)               |
| 3'''           | 71.61  | 4.23 (1H, m)               |
| 4'''           | 74.07  | 4.05 (1H, m)               |
| 5'''           | 69.42  | 4.94 (1H, m)               |
| 6'''           | 18.61  | 1.77 (1H, d, $J=6.2$ Hz)   |
| 26-O-Glu-1'''' | 104.90 | 4.82 (1H, d, $J=7.8$ Hz)   |
| 2''''          | 75.15  | 4.05 (1H, m)               |
| 3''''          | 76.14  | 3.87 (1H, m)               |
| 4''''          | 72.41  | 4.56 (1H, m)               |
| 5''''          | 78.46  | 4.23 (1H, m)               |
| 6''''          | 62.74  | 4.40 (1H, m), 4.56 (1H, m) |

The chemical shift assignments of carbon and proton signals of **Dioscin E** (Compound **5**) in Pyridine- $d_5$ .

| Carbon NO. | Dioscin E        |                                                              |
|------------|------------------|--------------------------------------------------------------|
|            | $\delta_C$ (ppm) | $\delta_C$ (ppm, $J$ in Hz)                                  |
| 1          | 37.35            | 1.68 (H <sub>2</sub> -1, m)                                  |
| 2          | 29.99            | 2.09 (H <sub>2</sub> -2, m)                                  |
| 3          | 78.1             | 4.24 (H <sub>1</sub> -3, m)                                  |
| 4          | 38.76            | 2.73 (H <sub>2</sub> -4, m)                                  |
| 5          | 140.61           |                                                              |
| 6          | 121.69           | 5.27 (H <sub>1</sub> -6, br.s)                               |
| 7          | 32.31            | 1.86 (H <sub>1</sub> -7a, m), 2.03 (H <sub>1</sub> -7b, m)   |
| 8          | 31.51            | 1.55 (H <sub>1</sub> -8, m)                                  |
| 9          | 50.19            | 0.93 (H <sub>1</sub> -9, m)                                  |
| 10         | 39.77            |                                                              |
| 11         | 20.95            | 1.46 (H <sub>2</sub> -11, m)                                 |
| 12         | 36.96            | 2.03 (H <sub>2</sub> -12, m)                                 |
| 13         | 40.51            |                                                              |
| 14         | 56.42            | 1.11 (H <sub>1</sub> -14, m)                                 |
| 15         | 32.18            | 1.46 (H <sub>1</sub> -15a, m), 2.09 (H <sub>1</sub> -15b, m) |
| 16         | 80.96            | 4.94 (H <sub>1</sub> -16, m)                                 |
| 17         | 63.63            | 1.93 (H <sub>1</sub> -17, m)                                 |
| 18         | 16.3             | 0.89 (H <sub>3</sub> -18, s)                                 |
| 19         | 19.24            | 1.05 (H <sub>3</sub> -19, s)                                 |
| 20         | 40.64            | 2.23 (H <sub>1</sub> -20, m)                                 |
| 21         | 16.29            | 1.34 (H <sub>3</sub> -21, d, $J=6.8$ Hz)                     |
| 22         | 110.55           |                                                              |
| 23         | 36.96            | 1.73 (H <sub>1</sub> -23a, m), 2.03 (H <sub>1</sub> -23b, m) |
| 24         | 28.18            | 1.68 (H <sub>1</sub> -24a, m), 2.03 (H <sub>1</sub> -24b, m) |
| 25         | 34.12            | 1.93 (H <sub>1</sub> -25, m)                                 |
| 26         | 75.12            | 3.62 (H <sub>1</sub> -26a, m), 4.07 (H <sub>1</sub> -26b, m) |
| 27         | 17.3             | 0.99 (H <sub>3</sub> -27, d, $J=6.6$ Hz)                     |

|                 |        |                            |
|-----------------|--------|----------------------------|
| 3-O-Glu-1'      | 99.81  | 4.94 (1H, d, $J=7.8$ Hz)   |
| 2'              | 75.39  | 4.06 (1H, m)               |
| 3'              | 76.07  | 3.86 (1H, m)               |
| 4'              | 81.27  | 4.24 (1H, m)               |
| 5'              | 77.15  | 4.24 (1H, m)               |
| 6'              | 61.3   | 4.39 (1H, m), 4.55 (1H, m) |
| Glu(1→4) 1''    | 104.31 | 5.1 (1H, d, $J=7.8$ Hz)    |
| 2''             | 73.91  | 4.39 (1H, m)               |
| 3''             | 87.94  | 4.17 (1H, m)               |
| 4''             | 69.17  | 4.17 (1H, m)               |
| 5''             | 77.42  | 3.86 (1H, m)               |
| 6''             | 61.59  | 4.24 (1H, m), 4.39 (1H, m) |
| Glu(1→3) 1'''   | 105.62 | 5.30 (1H, d, $J=7.9$ Hz)   |
| 2'''            | 78.01  | 4.24 (1H, m)               |
| 3'''            | 77.8   | 3.86 (1H, m)               |
| 4'''            | 71.44  | 4.24 (1H, m)               |
| 5'''            | 78.5   | 4.06 (1H, m)               |
| 6'''            | 62.34  | 4.39 (1H, m), 4.55 (1H, m) |
| Rha(1→2)1''''   | 101.65 | 6.25 (1H, br.s)            |
| 2''''           | 72.25  | 4.74 (1H, br.s)            |
| 3''''           | 72.58  | 4.55 (1H, m)               |
| 4''''           | 73.65  | 4.06 (1H, m)               |
| 5''''           | 69.33  | 4.94 (1H, m)               |
| 6''''           | 18.48  | 1.77 (3H, d, $J=6.1$ Hz)   |
| 26-O-Glu-1''''' | 104.72 | 4.82 (1H, d, $J=7.7$ Hz)   |
| 2'''''          | 75.01  | 4.06 (1H, m)               |
| 3'''''          | 78.4   | 4.24 (1H, m)               |
| 4'''''          | 71.51  | 4.24 (1H, m)               |
| 5'''''          | 78.27  | 4.06 (1H, m)               |
| 6'''''          | 62.63  | 4.39 (1H, m), 4.55 (1H, m) |

The chemical shift assignments of carbon and proton signals of **Dioscin F** (Compound **6**) in Pyridine- $d_5$ .

| Carbon NO. | Dioscin F        |                                                            |
|------------|------------------|------------------------------------------------------------|
|            | $\delta_C$ (ppm) | $\delta_C$ (ppm)                                           |
| 1          | 37.39            | 1.64 (H <sub>2</sub> -1, m)                                |
| 2          | 30.02            | 2.05 (H <sub>2</sub> -2, m)                                |
| 3          | 78.02            | 4.21 (H <sub>1</sub> -3, m)                                |
| 4          | 38.81            | 2.71 (H <sub>2</sub> -4, m)                                |
| 5          | 140.64           |                                                            |
| 6          | 121.74           | 5.27 (H <sub>1</sub> -6, br.s)                             |
| 7          | 32.36            | 1.89 (H <sub>1</sub> -7a, m), 2.01 (H <sub>1</sub> -7b, m) |
| 8          | 31.55            | 1.47 (H <sub>1</sub> -8, m)                                |

|                 |        |                                                              |
|-----------------|--------|--------------------------------------------------------------|
| 9               | 50.22  | 0.92 (H <sub>1</sub> -9, m)                                  |
| 10              | 39.81  |                                                              |
| 11              | 20.99  | 1.47 (H <sub>2</sub> -11, m)                                 |
| 12              | 37.01  | 2.05 (H <sub>2</sub> -12, m)                                 |
| 13              | 40.57  |                                                              |
| 14              | 56.47  | 1.09 (H <sub>1</sub> -14, m)                                 |
| 15              | 32.23  | 1.46 (H <sub>1</sub> -15a, m), 2.09 (H <sub>1</sub> -15b, m) |
| 16              | 81     | 4.96 (H <sub>1</sub> -16, m)                                 |
| 17              | 63.71  | 1.89 (H <sub>1</sub> -17, m)                                 |
| 18              | 16.36  | 0.88 (H <sub>3</sub> -18, s)                                 |
| 19              | 19.29  | 1.03 (H <sub>3</sub> -19, s)                                 |
| 20              | 40.67  | 2.22 (H <sub>1</sub> -20, m)                                 |
| 21              | 16.36  | 1.32 (H <sub>3</sub> -21, d, <i>J</i> =6.87 Hz)              |
| 22              | 110.57 |                                                              |
| 23              | 37.09  | 1.74 (H <sub>1</sub> -23a, m), 2.01 (H <sub>1</sub> -23b, m) |
| 24              | 28.25  | 1.68 (H <sub>1</sub> -24a, m), 2.01 (H <sub>1</sub> -24b, m) |
| 25              | 34.18  | 1.89 (H <sub>1</sub> -25, m)                                 |
| 26              | 75.17  | 3.61 (H <sub>1</sub> -26a, m), 3.9 (H <sub>1</sub> -26b, m)  |
| 27              | 17.36  | 0.97 (H <sub>3</sub> -27, d, <i>J</i> =6.6 Hz)               |
| 3-O-Glu-1'      | 100.11 | 4.93 (1H, d, <i>J</i> =7.54 Hz)                              |
| 2'              | 77.88  | 4.21 (1H, m)                                                 |
| 3'              | 76.14  | 3.90 (1H, m)                                                 |
| 4'              | 81.35  | 4.21 (1H, m)                                                 |
| 5'              | 77.14  | 4.21 (1H, m)                                                 |
| 6'              | 61.33  | 4.45 (1H, m), 4.55 (1H, m)                                   |
| Glu(1→4)1''     | 104.43 | 5.09 (1H, d, <i>J</i> =6.87 Hz)                              |
| 2''             | 73.99  | 4.36 (1H, m)                                                 |
| 3''             | 88.12  | 4.21 (1H, m)                                                 |
| 4''             | 69.19  | 4.21 (1H, m)                                                 |
| 5''             | 77.18  | 3.90 (1H, m)                                                 |
| 6''             | 61.61  | 4.21 (1H, m), 4.36 (1H, m)                                   |
| Glu(1→3)1'''    | 105.76 | 5.29 (1H, d, <i>J</i> =7.9 Hz)                               |
| 2'''            | 76.09  | 4.21 (1H, m)                                                 |
| 3'''            | 77.51  | 3.90 (1H, m)                                                 |
| 4'''            | 71.56  | 4.21 (1H, m)                                                 |
| 5'''            | 78.59  | 4.05 (1H, m)                                                 |
| 6'''            | 62.39  | 4.36 (1H, m), 4.55 (1H, m)                                   |
| Glu(1→2)1''''   | 99.84  | 4.92 (1H, d, <i>J</i> =6.87 Hz)                              |
| 2''''           | 75.46  | 4.05 (1H, m)                                                 |
| 3''''           | 78.49  | 4.21 (1H, m)                                                 |
| 4''''           | 71.48  | 4.21 (1H, m)                                                 |
| 5''''           | 78.38  | 4.05 (1H, m)                                                 |
| 6''''           | 62.69  | 4.45 (1H, m), 4.55 (1H, m)                                   |
| Rha(1→2) 1''''' | 101.71 | 6.23 (1H, s)                                                 |

---

|                |        |                            |
|----------------|--------|----------------------------|
| 2''''          | 72.34  | 4.55 (1H, m)               |
| 3''''          | 72.66  | 4.45 (1H, m)               |
| 4''''          | 73.65  | 4.05 (1H, m)               |
| 5''''          | 69.38  | 4.93 (1H, m)               |
| 6''''          | 18.55  | 1.78 (1H, d, $J=6.45$ Hz)  |
| 26-O-Glu-1'''' | 104.82 | 4.81 (1H, d, $J=7.7$ Hz)   |
| 2''''          | 75.08  | 4.05 (1H, m)               |
| 3''''          | 78.42  | 4.21 (1H, m)               |
| 4''''          | 71.62  | 4.21 (1H, m)               |
| 5''''          | 78.19  | 4.05 (1H, m)               |
| 6''''          | 62.39  | 4.36 (1H, m), 4.55 (1H, m) |

---
