# Supplementary material for: New steroid saponins from Dioscorea zingiberensis yam and their medicinal use against I/R via anti-inflammatory effect
Source: Royal Society of Chemistry journal article supplement (doi:10.1039/d1fo01301g), 2021-01-01
Supplement: d1fo01301g15.pdf [file d1fo01301g15.pdf]

The chemical shift assignments of carbon and proton signals of **Dioscin G**  
 (Compound 7) in Pyridine-*d*<sub>5</sub>.

| Carbon NO.    | Dioscin G        |                                                                                                        |
|---------------|------------------|--------------------------------------------------------------------------------------------------------|
|               | $\delta_C$ (ppm) | $\delta_C$ (ppm, <i>J</i> in Hz)                                                                       |
| 1             | 37.07            | 0.92 (H <sub>2</sub> -1, m)                                                                            |
| 2             | 30.14            | 1.91 (H <sub>1</sub> -2a, m), 2.14 (H <sub>1</sub> -2b, m)                                             |
| 3             | 78.55            | 3.93 (H <sub>1</sub> -3, m)                                                                            |
| 4             | 38.92            | 2.75 (H <sub>1</sub> -4a, t, <i>J</i> =11.5 Hz), 2.81 (H <sub>1</sub> -4b, dd, <i>J</i> =12.4, 3.8 Hz) |
| 5             | 140.73           |                                                                                                        |
| 6             | 121.72           | 5.29 (H <sub>1</sub> -6, d, <i>J</i> =4.6 Hz)                                                          |
| 7             | 32.27            | 1.91 (H <sub>1</sub> -7a, m), 2.03 (H <sub>1</sub> -7b, m)                                             |
| 8             | 31.61            | 1.45 (H <sub>1</sub> -8, m)                                                                            |
| 9             | 50.25            | 0.92 (H <sub>1</sub> -9, m)                                                                            |
| 10            | 39.86            |                                                                                                        |
| 11            | 21.03            | 1.45 (H <sub>2</sub> -11, m)                                                                           |
| 12            | 37.45            | 2.03 (H <sub>2</sub> -12, m)                                                                           |
| 13            | 40.71            |                                                                                                        |
| 14            | 56.52            | 1.13 (H <sub>1</sub> -14, m)                                                                           |
| 15            | 32.41            | 1.45 (H <sub>1</sub> -15a, m), 2.03 (H <sub>1</sub> -15b, m)                                           |
| 16            | 81.03            | 4.98 (H <sub>1</sub> -16, m)                                                                           |
| 17            | 63.77            | 1.91 (H <sub>1</sub> -17, m)                                                                           |
| 18            | 16.4             | 0.9 (H <sub>3</sub> -18, s)                                                                            |
| 19            | 19.35            | 1.05 (H <sub>3</sub> -19, s)                                                                           |
| 20            | 40.62            | 2.22 (H <sub>1</sub> -20, m)                                                                           |
| 21            | 16.4             | 1.33 (H <sub>3</sub> -21, d, <i>J</i> =6.9 Hz)                                                         |
| 22            | 110.57           |                                                                                                        |
| 23            | 37.15            | 1.72 (H <sub>1</sub> -23a, m), 2.03 (H <sub>1</sub> -23b, m)                                           |
| 24            | 28.29            | 1.67 (H <sub>1</sub> -24a, m), 2.03 (H <sub>1</sub> -24b, m)                                           |
| 25            | 34.22            | 1.91 (H <sub>1</sub> -25, m)                                                                           |
| 26            | 75.14            | 3.62 (H <sub>1</sub> -26a, m), 4.29 (H <sub>1</sub> -26b, m)                                           |
| 27            | 17.41            | 0.98 (H <sub>3</sub> -27, d, <i>J</i> =6.7 Hz)                                                         |
| 3-O-Glc-1'    | 100.28           | 5.05 (1H, d, <i>J</i> =7.7 Hz)                                                                         |
| 2'            | 77.71            | 4.29 (1H, m)                                                                                           |
| 3'            | 78.24            | 4.29 (1H, m)                                                                                           |
| 4'            | 71.6             | 4.24 (1H, m)                                                                                           |
| 5'            | 78.44            | 4.19 (1H, m)                                                                                           |
| 6'            | 62.57            | 4.38 (1H, m), 4.64 (1H, m)                                                                             |
| Rha(1→2) 1''  | 102.01           | 6.4 (1H, s)                                                                                            |
| 2''           | 71.72            | 4.24 (1H, m)                                                                                           |
| 3''           | 72.54            | 4.64 (1H, m)                                                                                           |
| 4''           | 72.78            | 4.64 (1H, m)                                                                                           |
| 5''           | 69.44            | 4.98 (1H, m)                                                                                           |
| 6''           | 18.63            | 1.78 (d, <i>J</i> =6.2 Hz)                                                                             |
| 26-O-Glc-1''' | 104.89           | 4.81 (1H, d, <i>J</i> =7.7 Hz)                                                                         |

|      |       |                            |
|------|-------|----------------------------|
| 2''' | 75.2  | 4.24 (1H, m)               |
| 3''' | 79.61 | 4.29 (1H, m)               |
| 4''' | 74.1  | 4.03 (1H, m)               |
| 5''' | 77.84 | 4.29 (1H, m)               |
| 6''' | 62.73 | 4.53 (1H, m), 4.64 (1H, m) |

The chemical shift assignments of carbon and proton signals of **Dioscin H** (Compound **8**) in Pyridine-*d*<sub>5</sub>.

| <b>Dioscin H</b>  |                  |                                                                                                        |
|-------------------|------------------|--------------------------------------------------------------------------------------------------------|
|                   | $\delta_C$ (ppm) | $\delta_C$ (ppm)                                                                                       |
| 1                 | 37.07            | 0.92 (H <sub>2</sub> -1, m)                                                                            |
| 2                 | 30.14            | 1.91 (H <sub>1</sub> -2a, m), 2.14 (H <sub>1</sub> -2b, m)                                             |
| 3                 | 78.55            | 3.93 (H <sub>1</sub> -3, m)                                                                            |
| 4                 | 38.92            | 2.75 (H <sub>1</sub> -4a, t, <i>J</i> =11.5 Hz), 2.81 (H <sub>1</sub> -4b, dd, <i>J</i> =12.4, 3.8 Hz) |
| 5                 | 140.73           |                                                                                                        |
| 6                 | 121.72           | 5.29 (H <sub>1</sub> -6, d, <i>J</i> =4.6 Hz)                                                          |
| 7                 | 32.27            | 1.91 (H <sub>1</sub> -7a, m), 2.03 (H <sub>1</sub> -7b, m)                                             |
| 8                 | 31.61            | 1.45 (H <sub>1</sub> -8, m)                                                                            |
| 9                 | 50.25            | 0.92 (H <sub>1</sub> -9, m)                                                                            |
| 10                | 39.86            |                                                                                                        |
| 11                | 21.03            | 1.45 (H <sub>2</sub> -11, m)                                                                           |
| 12                | 37.45            | 2.03 (H <sub>2</sub> -12, m)                                                                           |
| 13                | 40.71            |                                                                                                        |
| 14                | 56.52            | 1.13 (H <sub>1</sub> -14, m)                                                                           |
| 15                | 32.41            | 1.45 (H <sub>1</sub> -7a, m), 2.03 (H <sub>1</sub> -7b, m)                                             |
| 16                | 81.03            | 4.98 (H <sub>1</sub> -16, m)                                                                           |
| 17                | 63.77            | 1.91 (H <sub>1</sub> -17, m)                                                                           |
| 18                | 16.4             | 0.9 (H <sub>3</sub> -18, s)                                                                            |
| 19                | 19.35            | 1.05 (H <sub>3</sub> -19, s)                                                                           |
| 20                | 40.62            | 2.22 (H <sub>1</sub> -20, m)                                                                           |
| 21                | 16.4             | 1.33 (H <sub>3</sub> -21, d, <i>J</i> =6.9 Hz)                                                         |
| 22                | 110.57           |                                                                                                        |
| 23                | 37.15            | 1.72 (H <sub>1</sub> -23a, m), 2.03 (H <sub>1</sub> -23b, m)                                           |
| 24                | 28.29            | 1.67 (H <sub>1</sub> -28a, m), 2.03 (H <sub>1</sub> -28b, m)                                           |
| 25                | 34.22            | 1.91 (H <sub>1</sub> -25, m)                                                                           |
| 26                | 75.14            | 3.62 (H <sub>1</sub> -26a, m), 4.29 (H <sub>1</sub> -26b, m)                                           |
| 27                | 17.41            | 0.98 (H <sub>3</sub> -27, d, <i>J</i> =6.7 Hz)                                                         |
| <b>3-O-Glu-1'</b> | 100.28           | 5.05 (1H, d, <i>J</i> =7.7 Hz)                                                                         |
| 2'                | 77.71            | 4.29 (1H, m)                                                                                           |
| 3'                | 78.24            | 4.29 (1H, m)                                                                                           |
| 4'                | 71.6             | 4.24 (1H, m)                                                                                           |
| 5'                | 78.44            | 4.19 (1H, m)                                                                                           |
| 6'                | 62.57            | 4.38 (1H, m), 4.64 (1H, m)                                                                             |

|                      |        |                            |
|----------------------|--------|----------------------------|
| <b>Rha(1→2) 1''</b>  | 102.01 | 6.4 (1H, s)                |
| 2''                  | 71.72  | 4.24 (1H, m)               |
| 3''                  | 72.54  | 4.64 (1H, m)               |
| 4''                  | 72.78  | 4.64 (1H, m)               |
| 5''                  | 69.44  | 4.98 (1H, m)               |
| 6''                  | 18.63  | 1.78 (d, $J=6.2$ Hz)       |
| <b>26-O-Glu-1'''</b> | 104.89 | 4.81 (1H, d, $J=7.7$ Hz)   |
| 2'''                 | 75.2   | 4.24 (1H, m)               |
| 3'''                 | 79.61  | 4.29 (1H, m)               |
| 4'''                 | 74.1   | 4.03 (1H, m)               |
| 5'''                 | 77.84  | 4.29 (1H, m)               |
| 6'''                 | 62.73  | 4.53 (1H, m), 4.64 (1H, m) |

The chemical shift assignments of carbon and proton signals of **Dioscin I** (Compound **9**) in Pyridine- $d_5$ .

| Carbon NO. | Dioscin I        |                                                              |
|------------|------------------|--------------------------------------------------------------|
|            | $\delta_C$ (ppm) | $\delta_C$ (ppm)                                             |
| 1          | 37.38            | 1.69 (H <sub>2</sub> -1, m)                                  |
| 2          | 30.02            | 2.08 (H <sub>2</sub> -2, m)                                  |
| 3          | 78.14            | 4.25 (H <sub>1</sub> -3, m)                                  |
| 4          | 38.8             | 2.73 (H <sub>2</sub> -4, m)                                  |
| 5          | 140.63           |                                                              |
| 6          | 121.72           | 5.27 (H <sub>1</sub> -6, br.s)                               |
| 7          | 32.35            | 1.86 (H <sub>1</sub> -7a, m), 2.03 (H <sub>1</sub> -7b, m)   |
| 8          | 31.55            | 1.55 (H <sub>1</sub> -8, m)                                  |
| 9          | 50.22            | 0.93 (H <sub>1</sub> -9, m)                                  |
| 10         | 39.8             |                                                              |
| 11         | 20.98            | 1.45 (H <sub>2</sub> -11, m)                                 |
| 12         | 37               | 2.03 (H <sub>2</sub> -12, m)                                 |
| 13         | 40.55            |                                                              |
| 14         | 56.46            | 1.11 (H <sub>1</sub> -14, m)                                 |
| 15         | 32.21            | 1.45 (H <sub>1</sub> -15a, m), 2.03 (H <sub>1</sub> -15b, m) |
| 16         | 80.98            | 4.95 (H <sub>1</sub> -16, m)                                 |
| 17         | 63.7             | 1.93 (H <sub>1</sub> -17, m)                                 |
| 18         | 16.34            | 0.89 (H <sub>3</sub> -18, s)                                 |
| 19         | 19.28            | 1.05 (H <sub>3</sub> -19, s)                                 |
| 20         | 40.67            | 2.23 (H <sub>1</sub> -20, m)                                 |
| 21         | 16.34            | 1.34 (H <sub>3</sub> -21, d, $J=6.8$ Hz)                     |
| 22         | 110.56           |                                                              |
| 23         | 37.06            | 1.74 (H <sub>1</sub> -23a, m), 2.03 (H <sub>1</sub> -23b, m) |
| 24         | 28.23            | 1.69 (H <sub>1</sub> -24a, m), 2.03 (H <sub>1</sub> -24b, m) |
| 25         | 34.15            | 1.93 (H <sub>1</sub> -25, m)                                 |
| 26         | 75.15            | 3.62 (H <sub>1</sub> -26a, m), 4.25 (H <sub>1</sub> -26b, m) |

|                 |        |                                                |
|-----------------|--------|------------------------------------------------|
| 27              | 17.35  | 0.99 (H <sub>3</sub> -27, d, <i>J</i> =6.6 Hz) |
| 3-O-Glu-1'      | 99.83  | 4.95 (1H, d, <i>J</i> =6.54 Hz)                |
| 2'              | 78.02  | 4.06 (1H, m)                                   |
| 3'              | 76.11  | 3.86 (1H, m)                                   |
| 4'              | 81.32  | 4.25 (1H, m)                                   |
| 5'              | 77.13  | 4.25 (1H, m)                                   |
| 6'              | 61.34  | 4.39 (1H, m), 4.56 (1H, m)                     |
| Glu(1→4) 1''    | 104.4  | 5.10 (1H, d, <i>J</i> =7.8 Hz)                 |
| 2''             | 73.96  | 4.39 (1H, m)                                   |
| 3''             | 88.07  | 4.17 (1H, m)                                   |
| 4''             | 69.18  | 4.17 (1H, m)                                   |
| 5''             | 77.47  | 3.86 (1H, m)                                   |
| 6''             | 61.6   | 4.39 (1H, m), 4.56 (1H, m)                     |
| Glu(1→3) 1'''   | 105.72 | 5.30 (1H, d, <i>J</i> =7.2 Hz)                 |
| 2'''            | 75.42  | 4.24 (1H, m)                                   |
| 3'''            | 77.84  | 3.86 (1H, m)                                   |
| 4'''            | 71.46  | 4.25 (1H, m)                                   |
| 5'''            | 78.54  | 4.06 (1H, m)                                   |
| 6'''            | 62.36  | 4.39 (1H, m), 4.56 (1H, m)                     |
| Rha(1→2)1''''   | 101.67 | 6.25 (1H, br.s)                                |
| 2''''           | 72.3   | 4.74 (1H, br.s)                                |
| 3''''           | 72.62  | 4.56 (1H, m)                                   |
| 4''''           | 73.65  | 4.06 (1H, m)                                   |
| 5''''           | 69.36  | 4.95 (1H, m)                                   |
| 6''''           | 18.53  | 1.77 (3H, d, <i>J</i> =6.1 Hz)                 |
| 26-O-Glu-1''''' | 104.78 | 4.82 (1H, d, <i>J</i> =7.6 Hz)                 |
| 2'''''          | 75.05  | 4.06 (1H, m)                                   |
| 3'''''          | 78.45  | 4.25 (1H, m)                                   |
| 4'''''          | 71.55  | 4.25 (1H, m)                                   |
| 5'''''          | 78.33  | 4.06 (1H, m)                                   |
| 6'''''          | 62.67  | 4.39 (1H, m), 4.56 (1H, m)                     |
