# Supplementary figures and images for: New steroid saponins from Dioscorea zingiberensis yam and their medicinal use against I/R via anti-inflammatory effect
Source: Royal Society of Chemistry journal article supplement (doi:10.1039/d1fo01301g), 2021-01-01

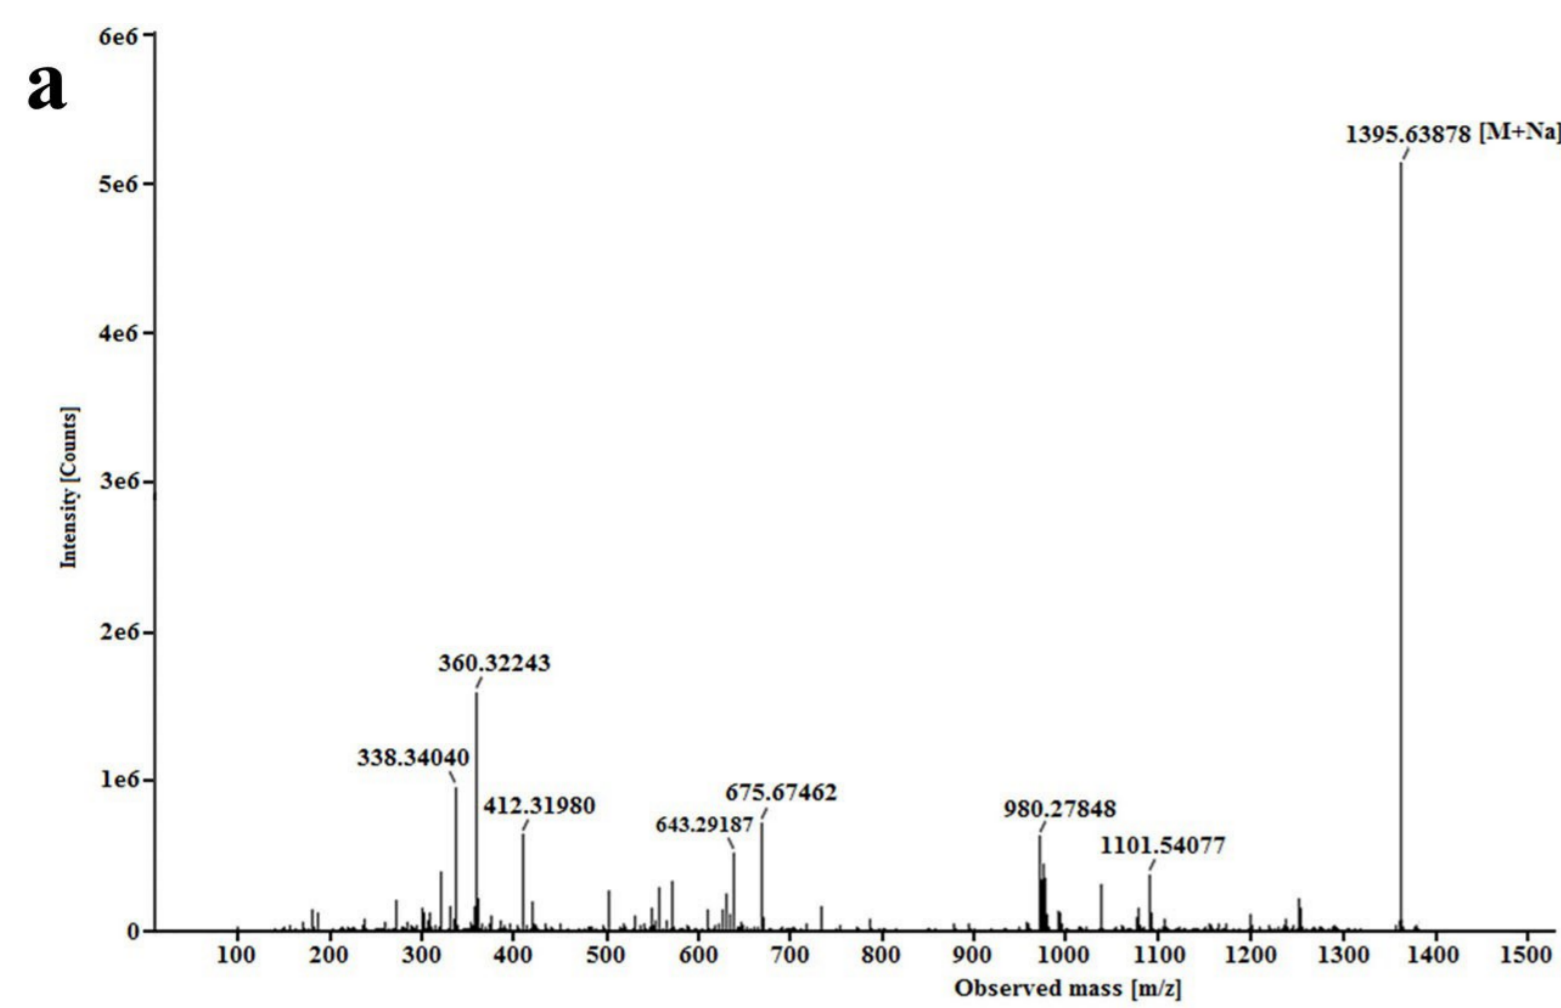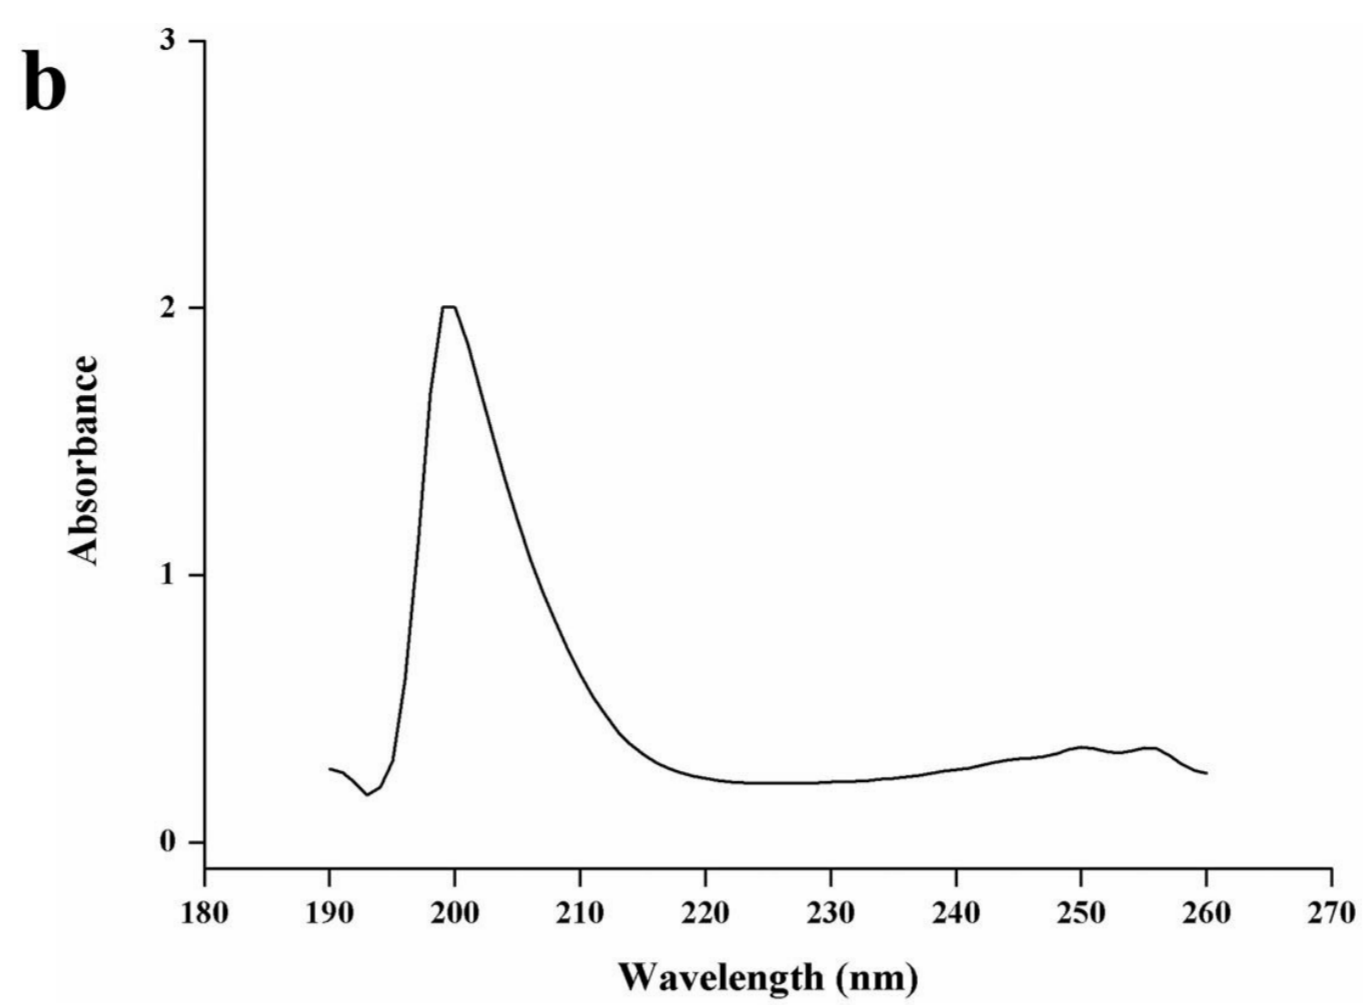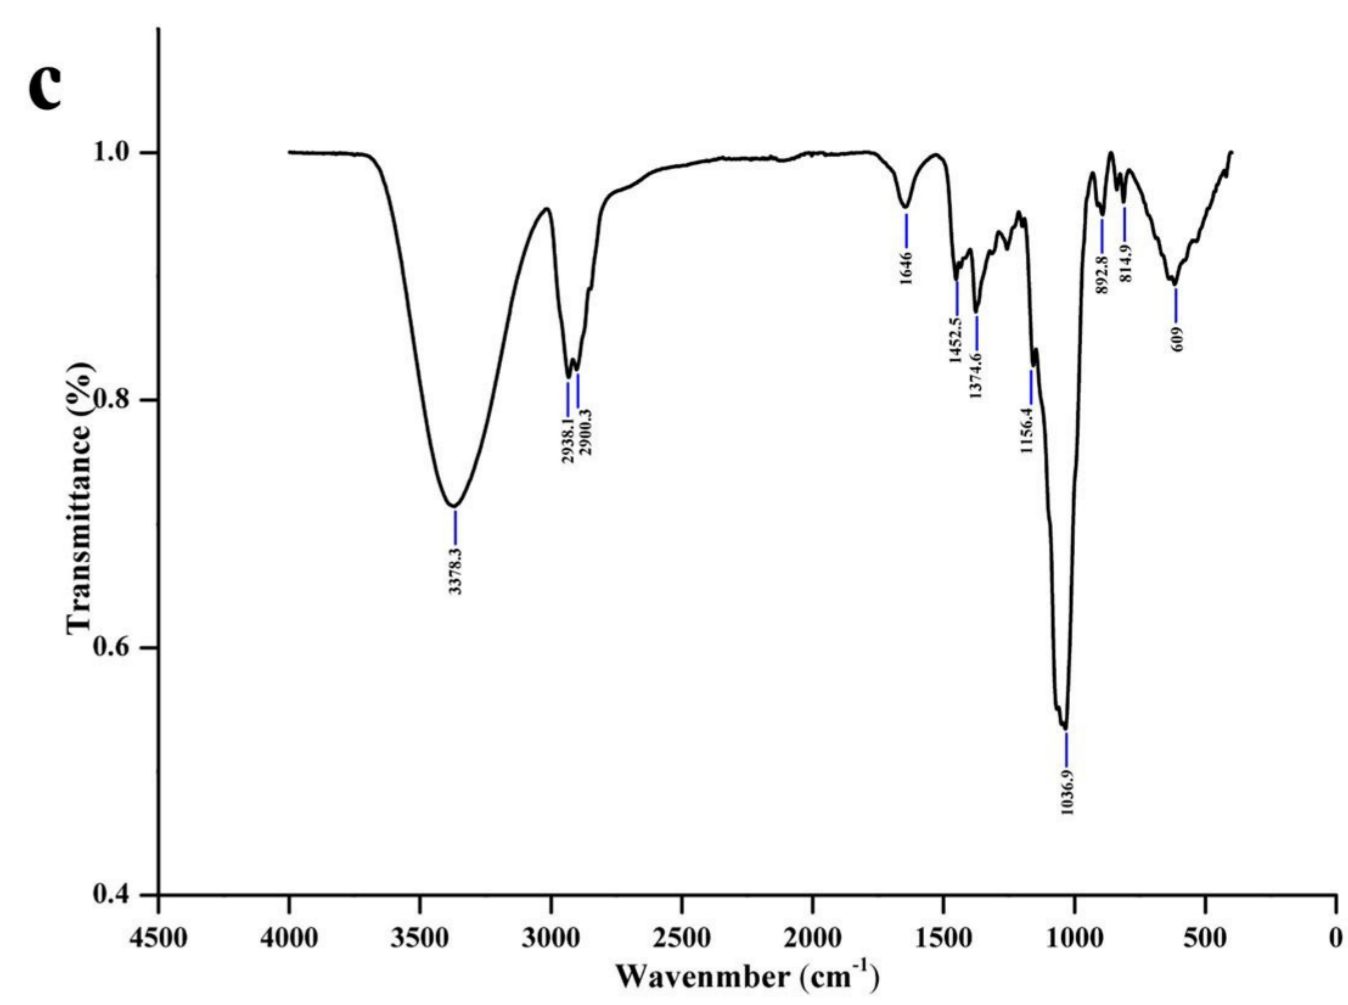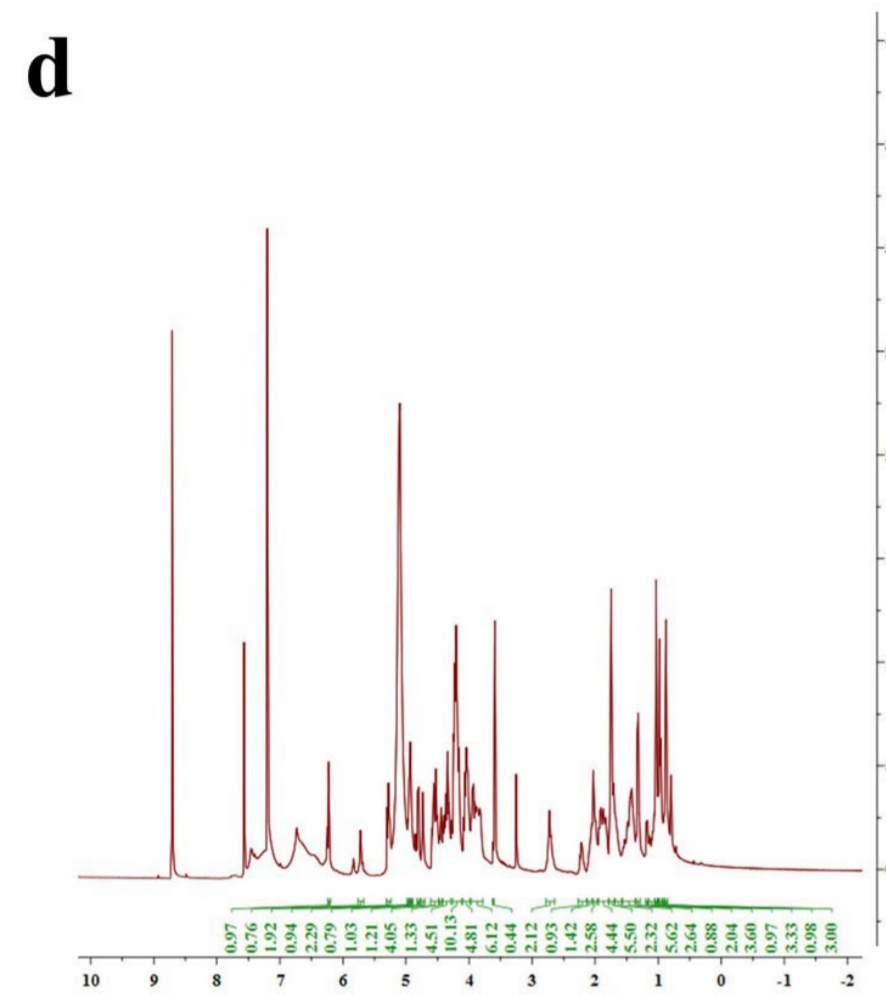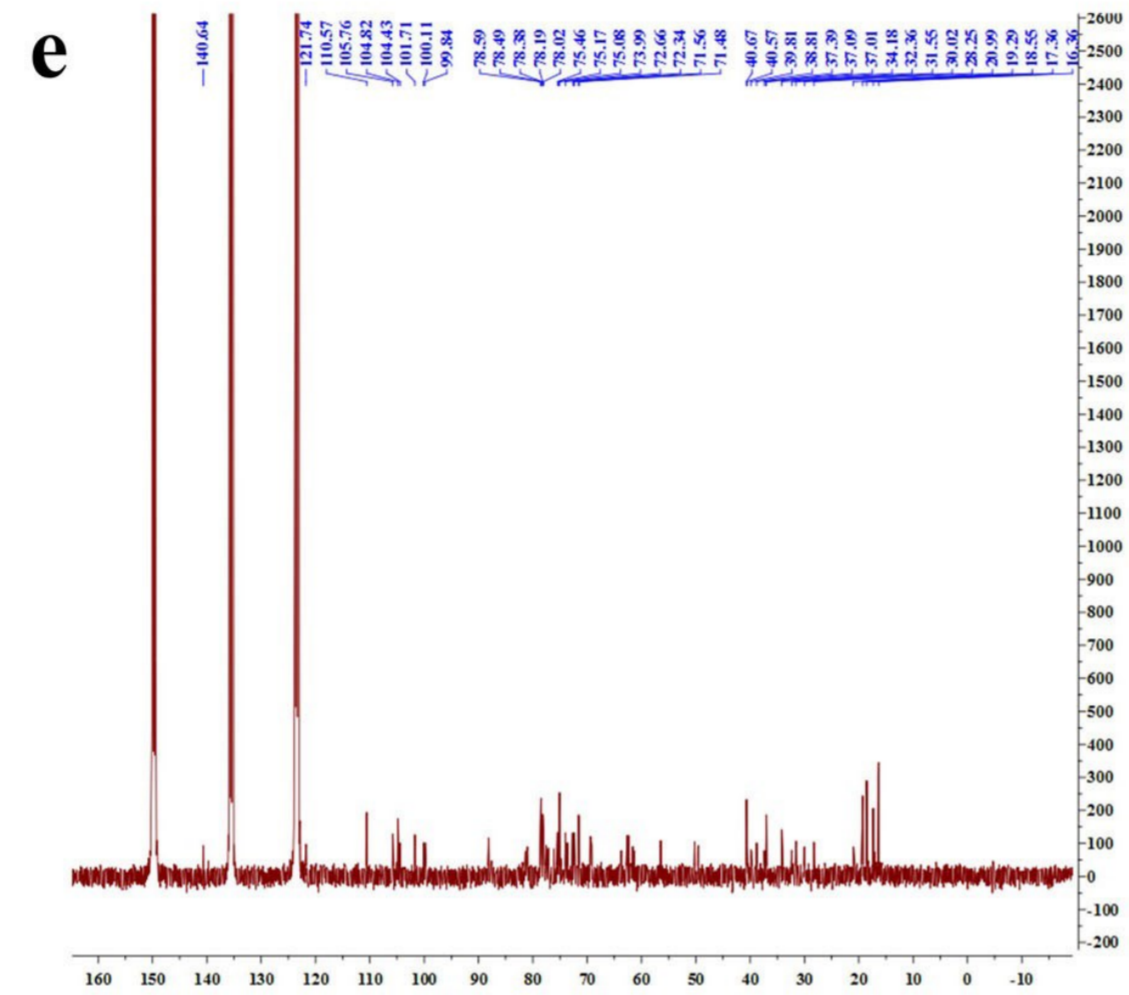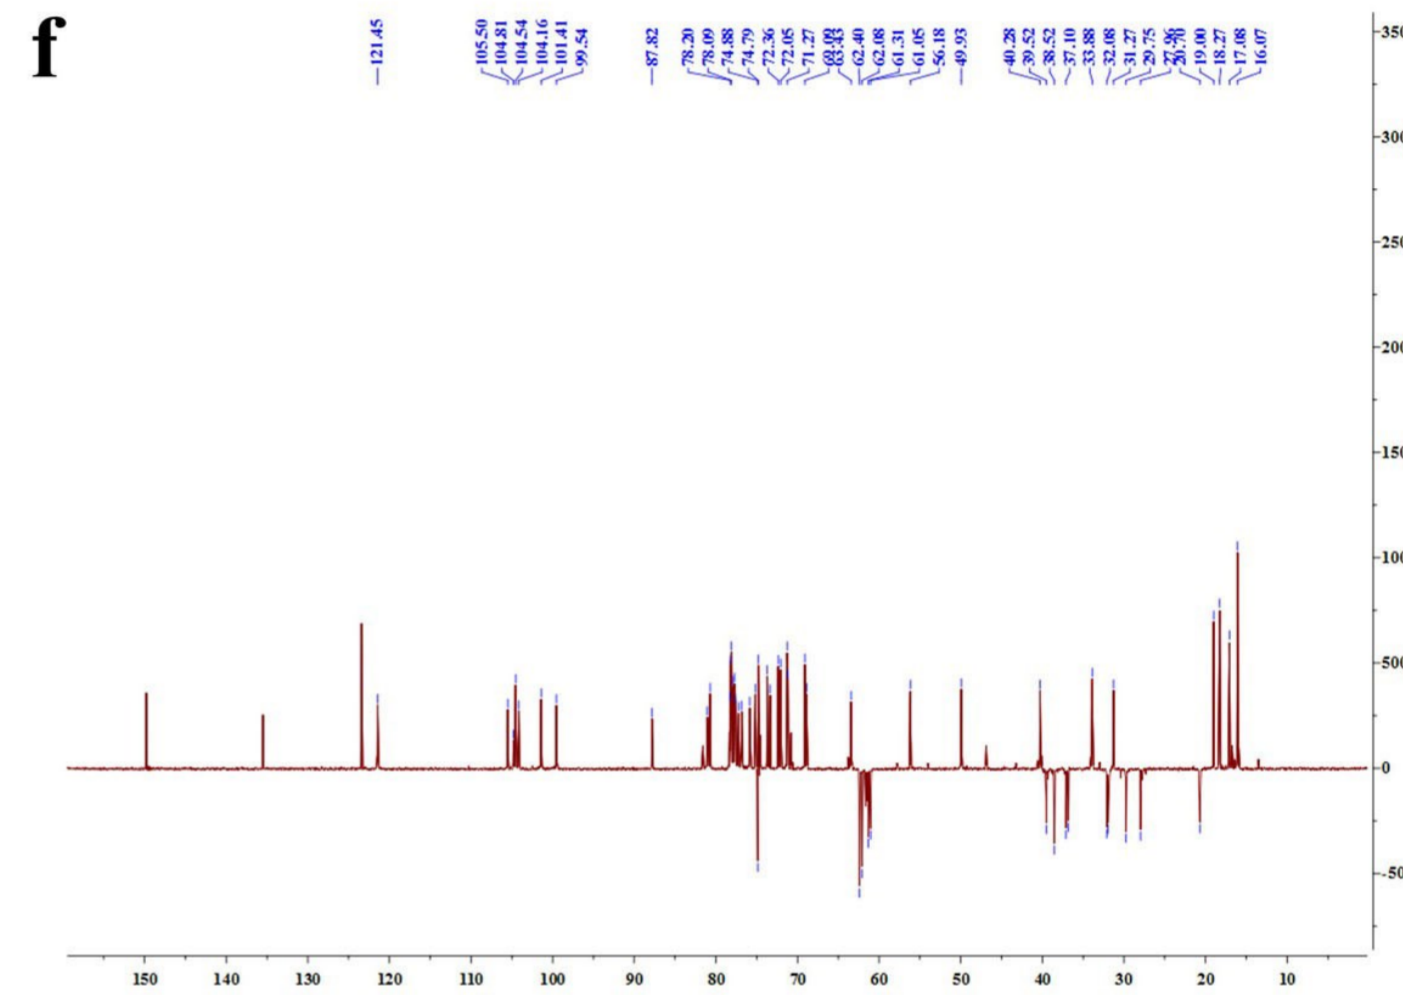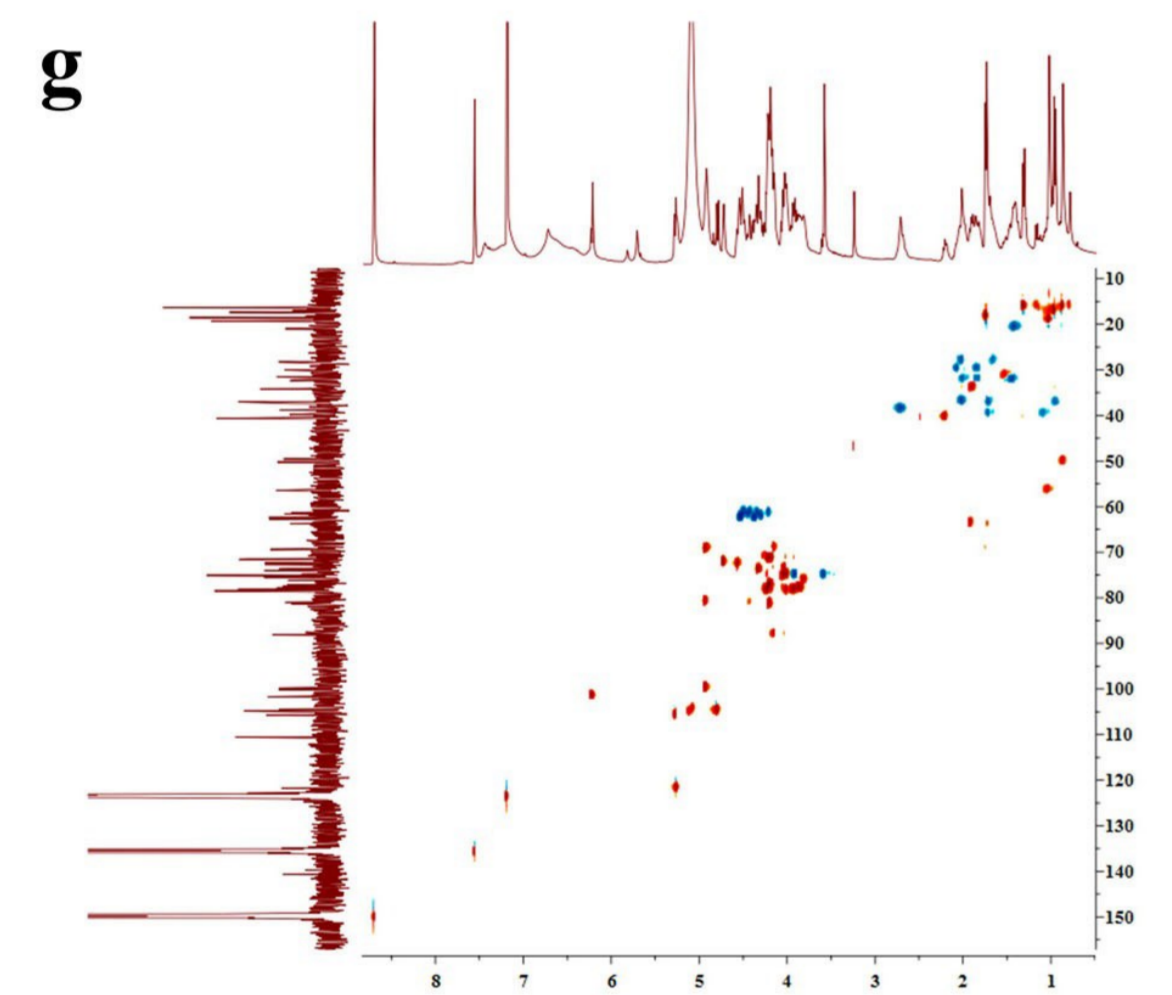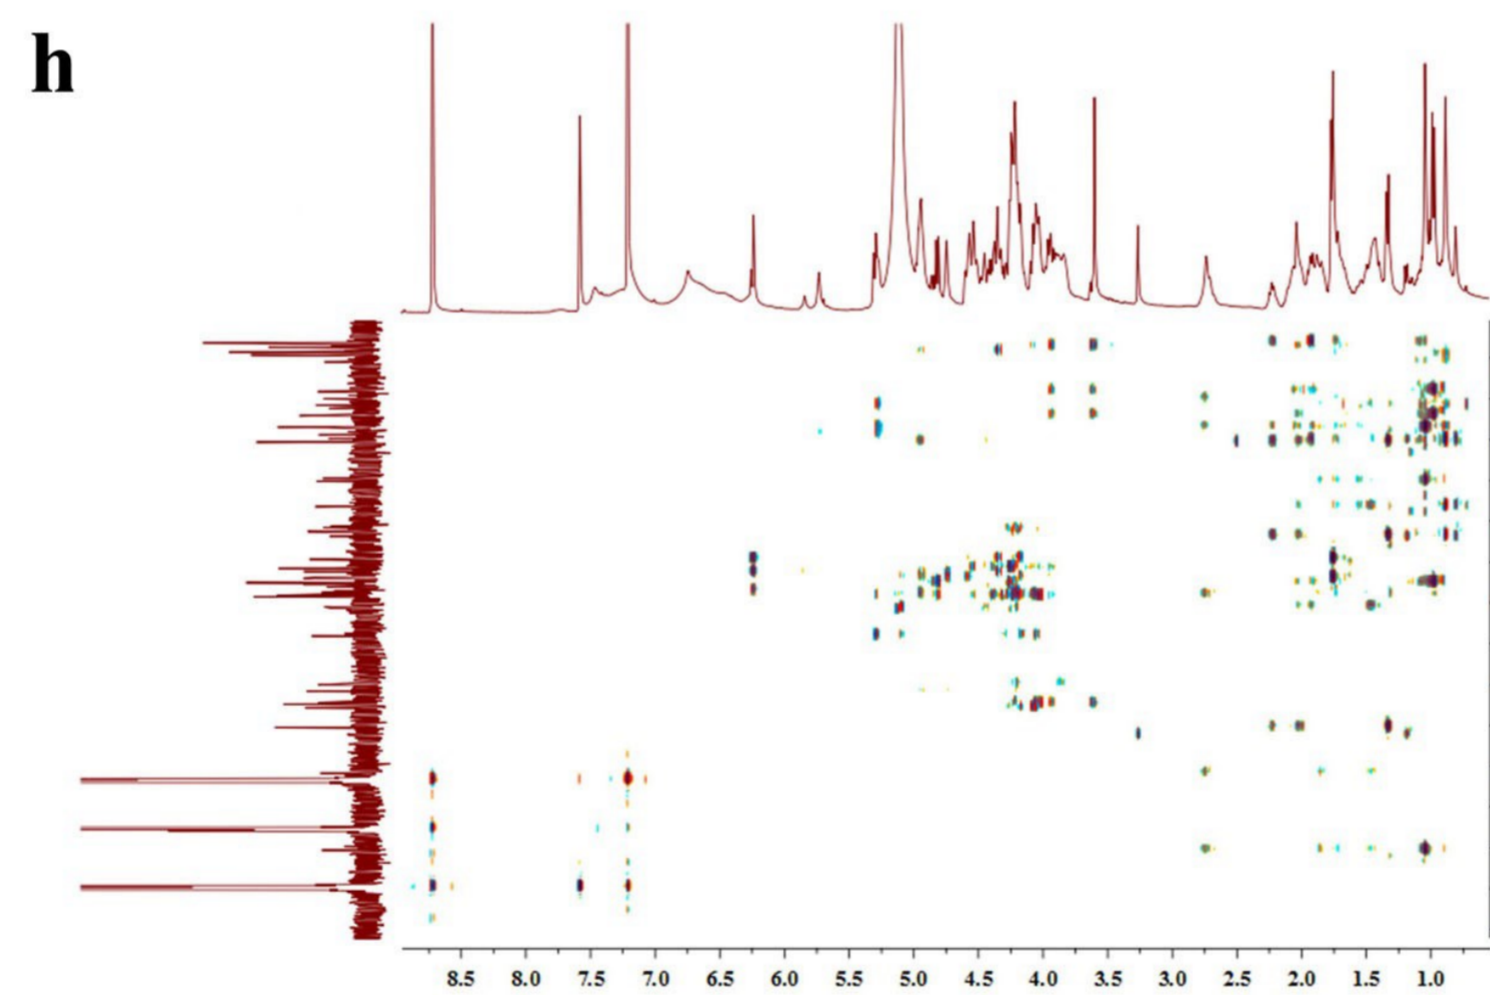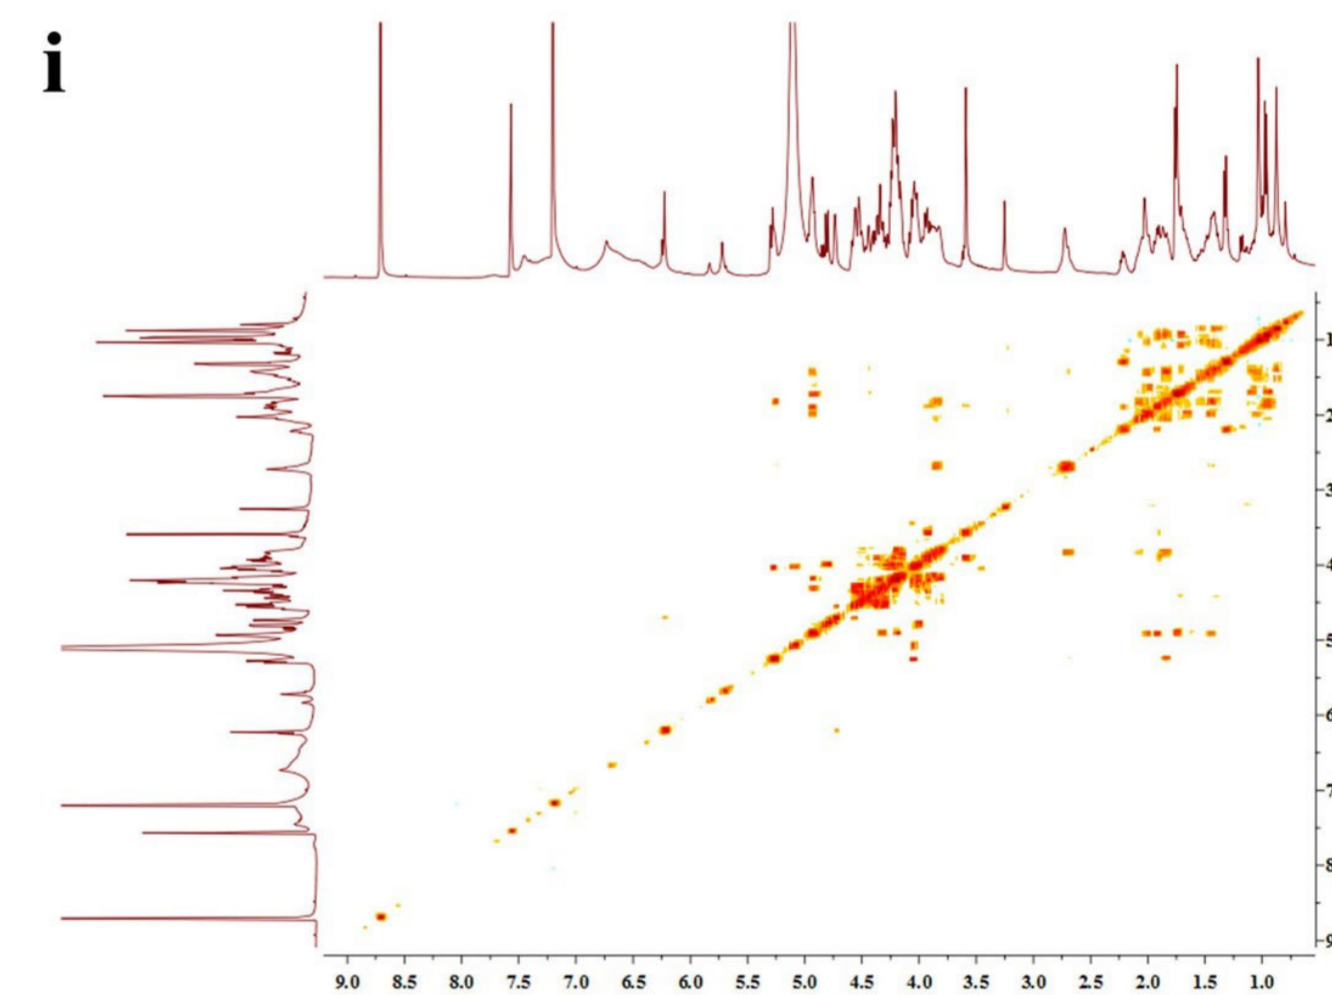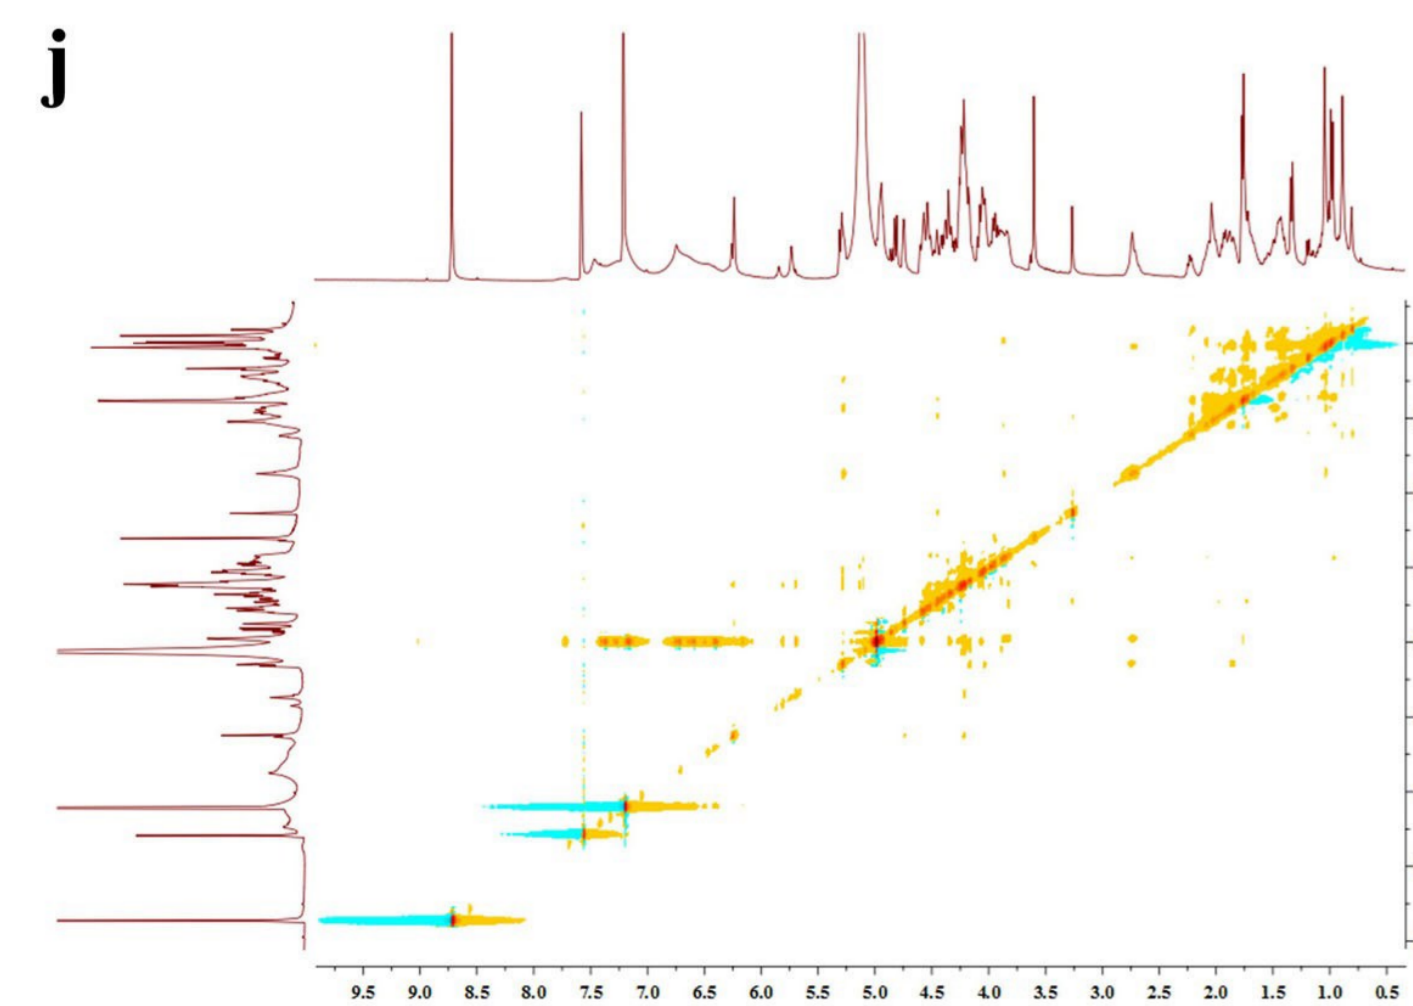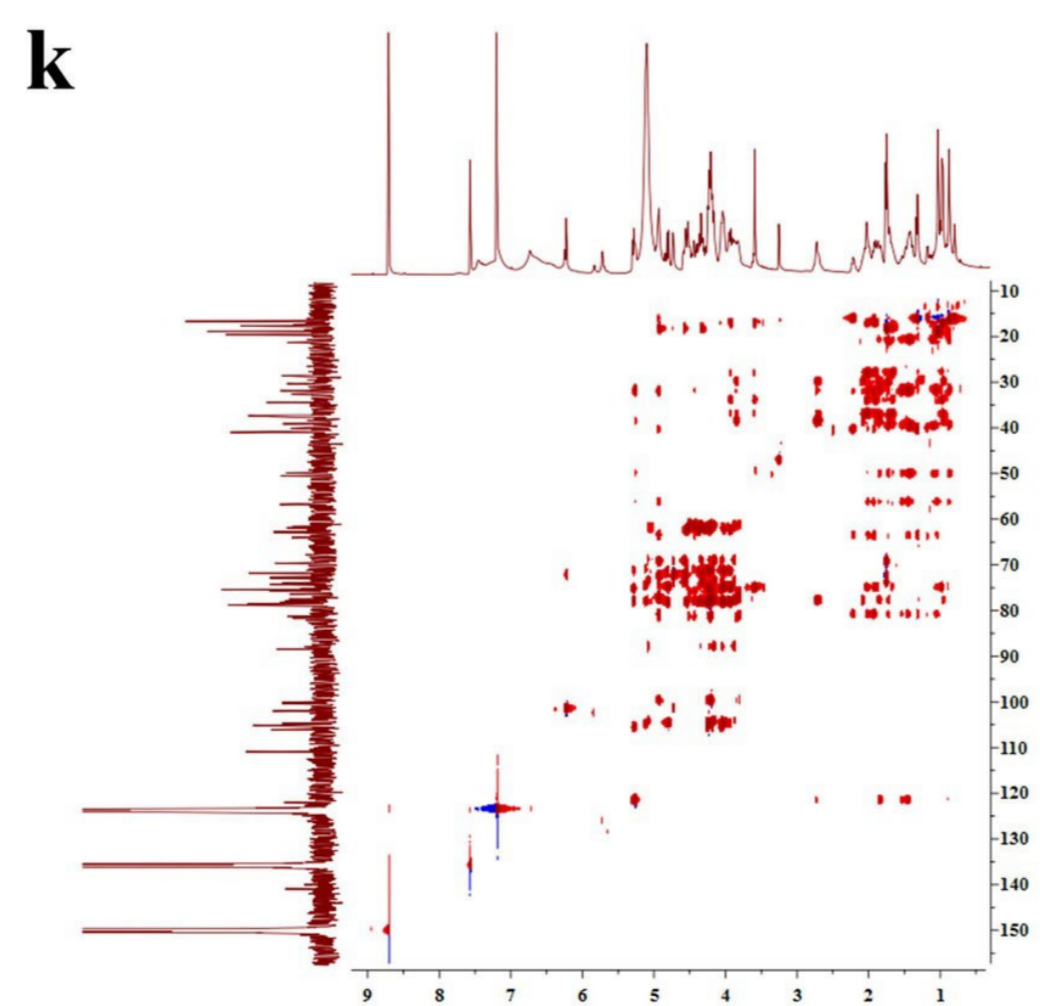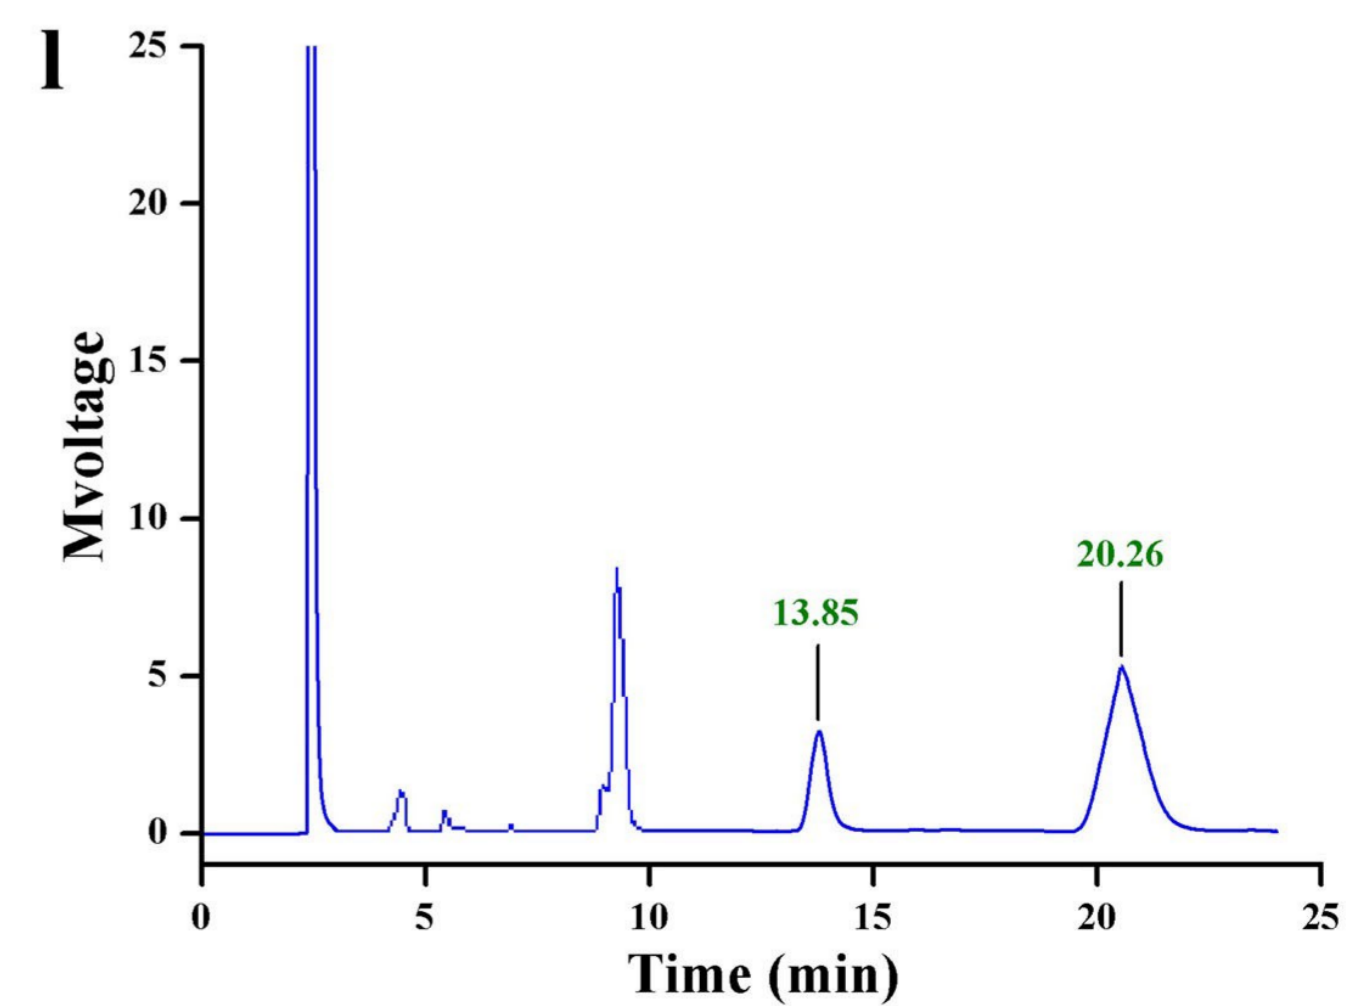

Supplement: d1fo01301g10.pdf [file d1fo01301g10.pdf]

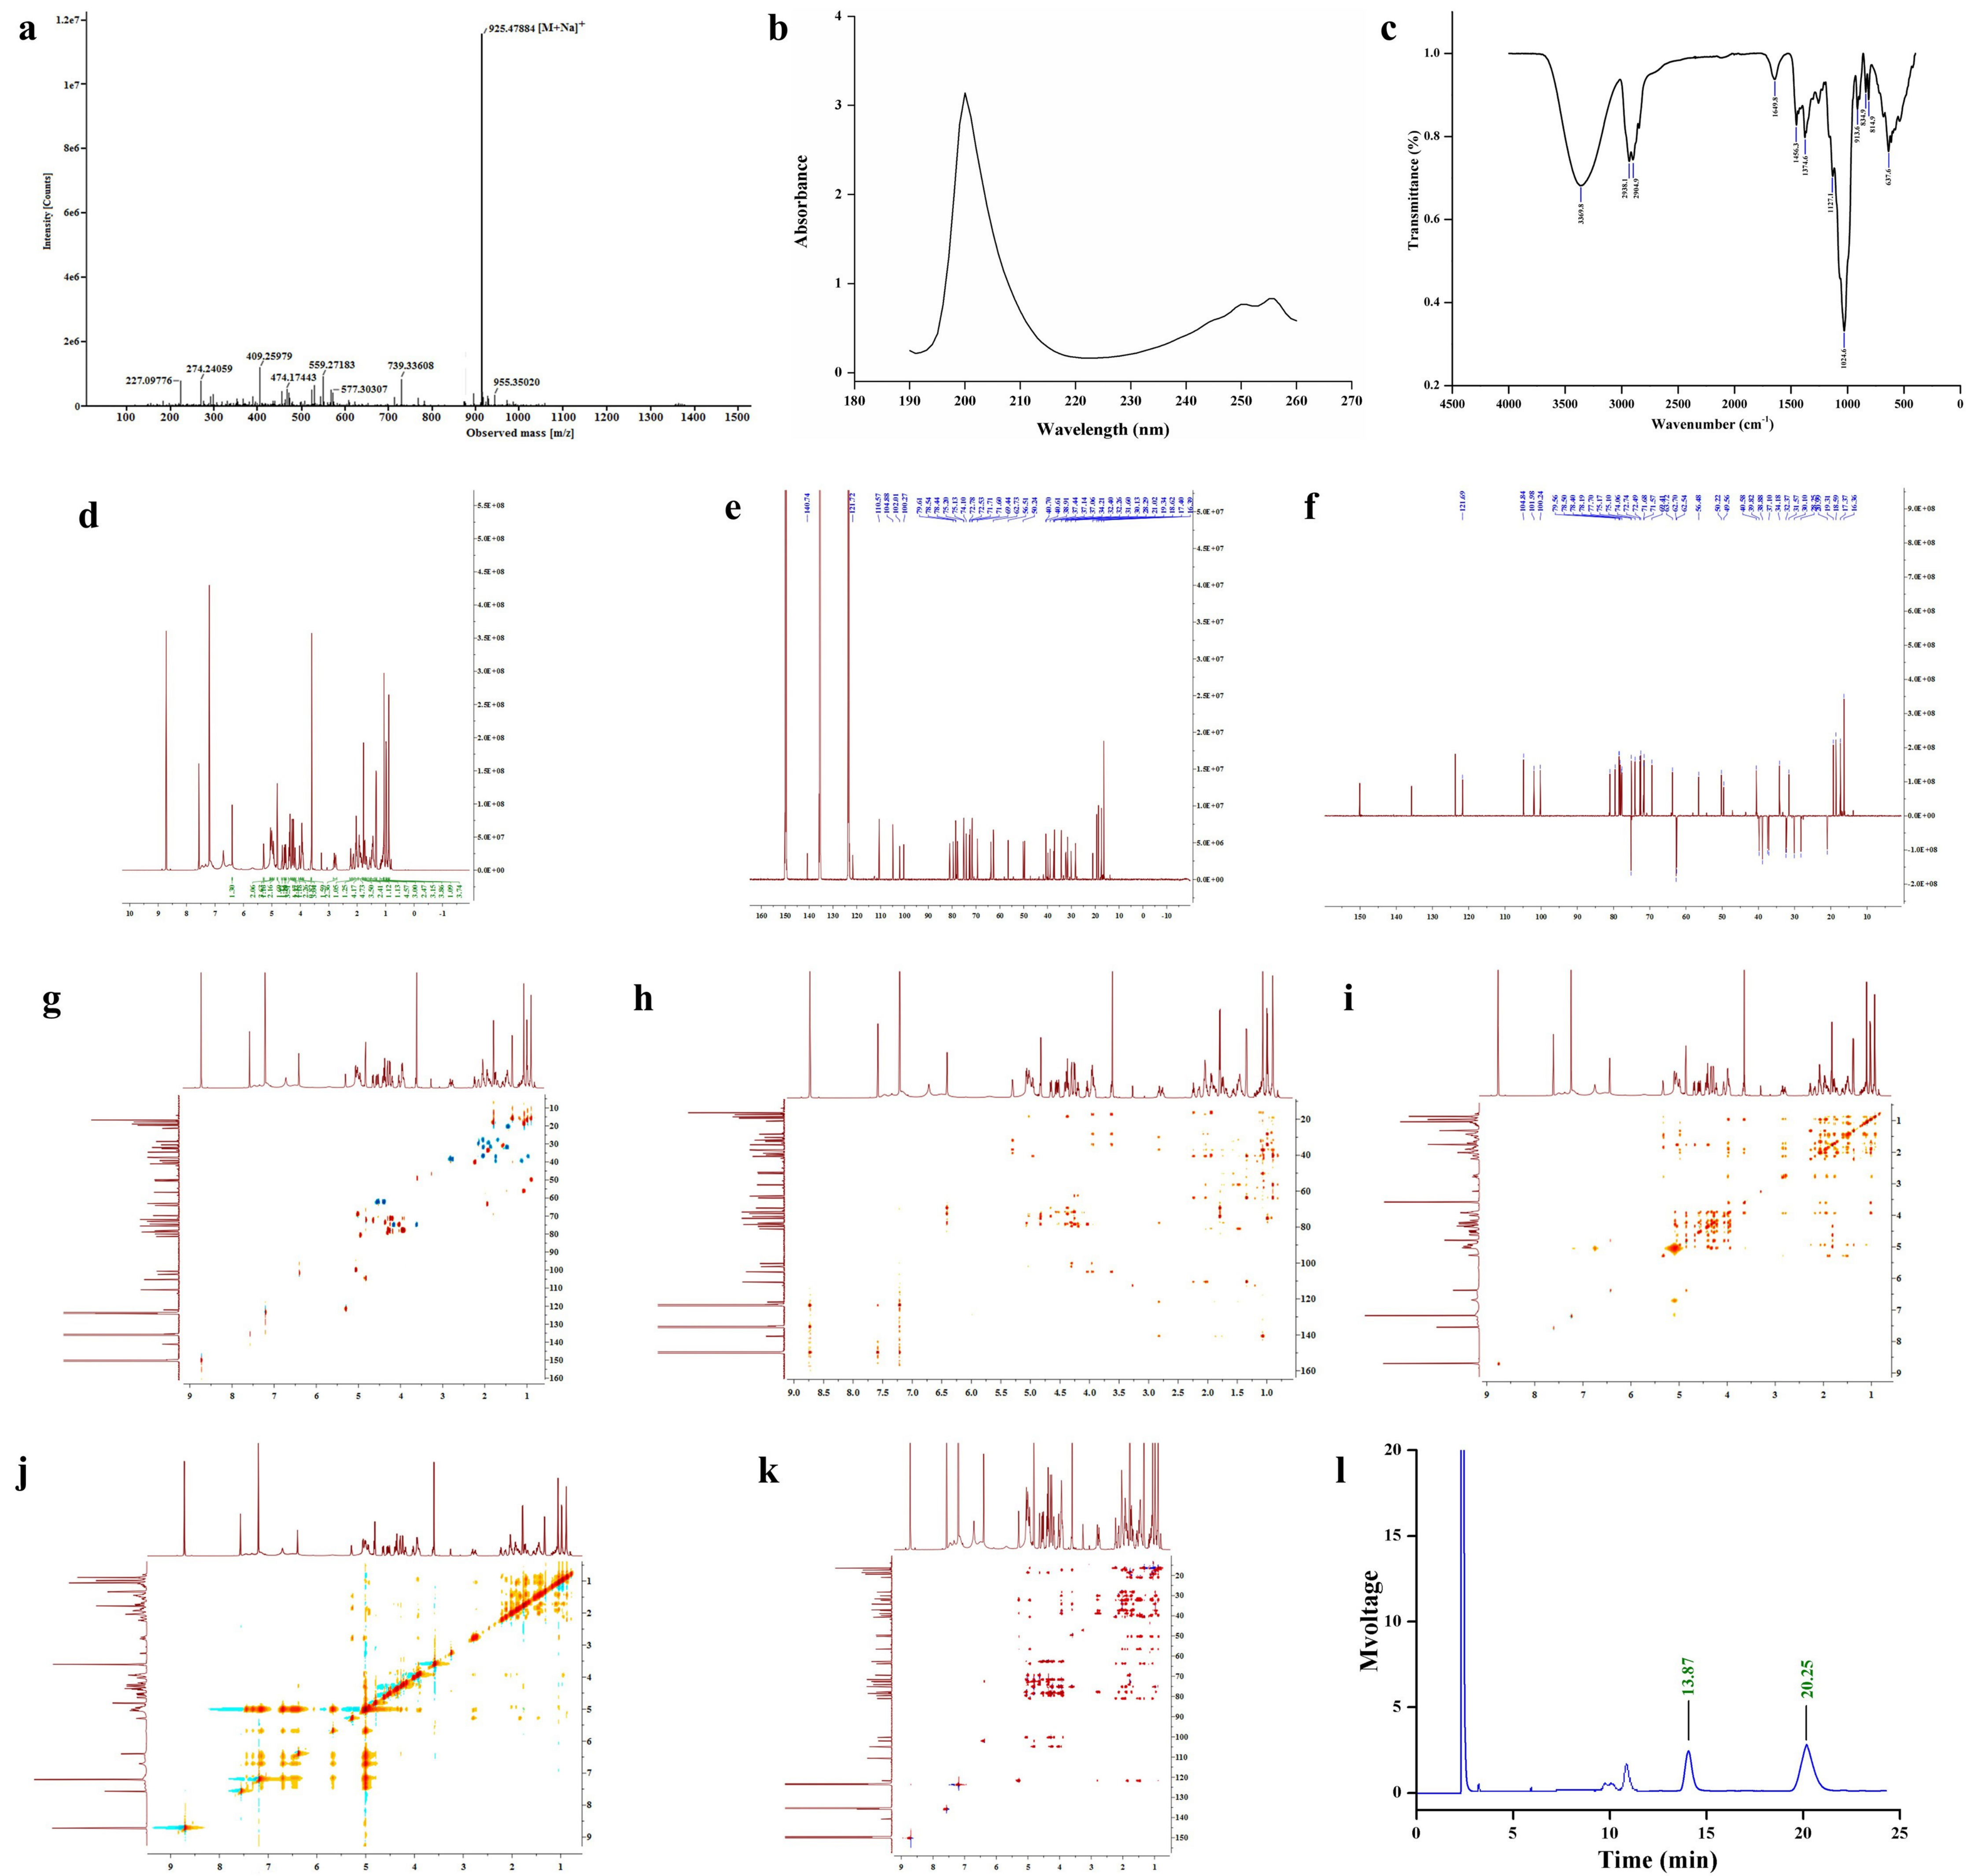

Supplement: d1fo01301g11.pdf [file d1fo01301g11.pdf]

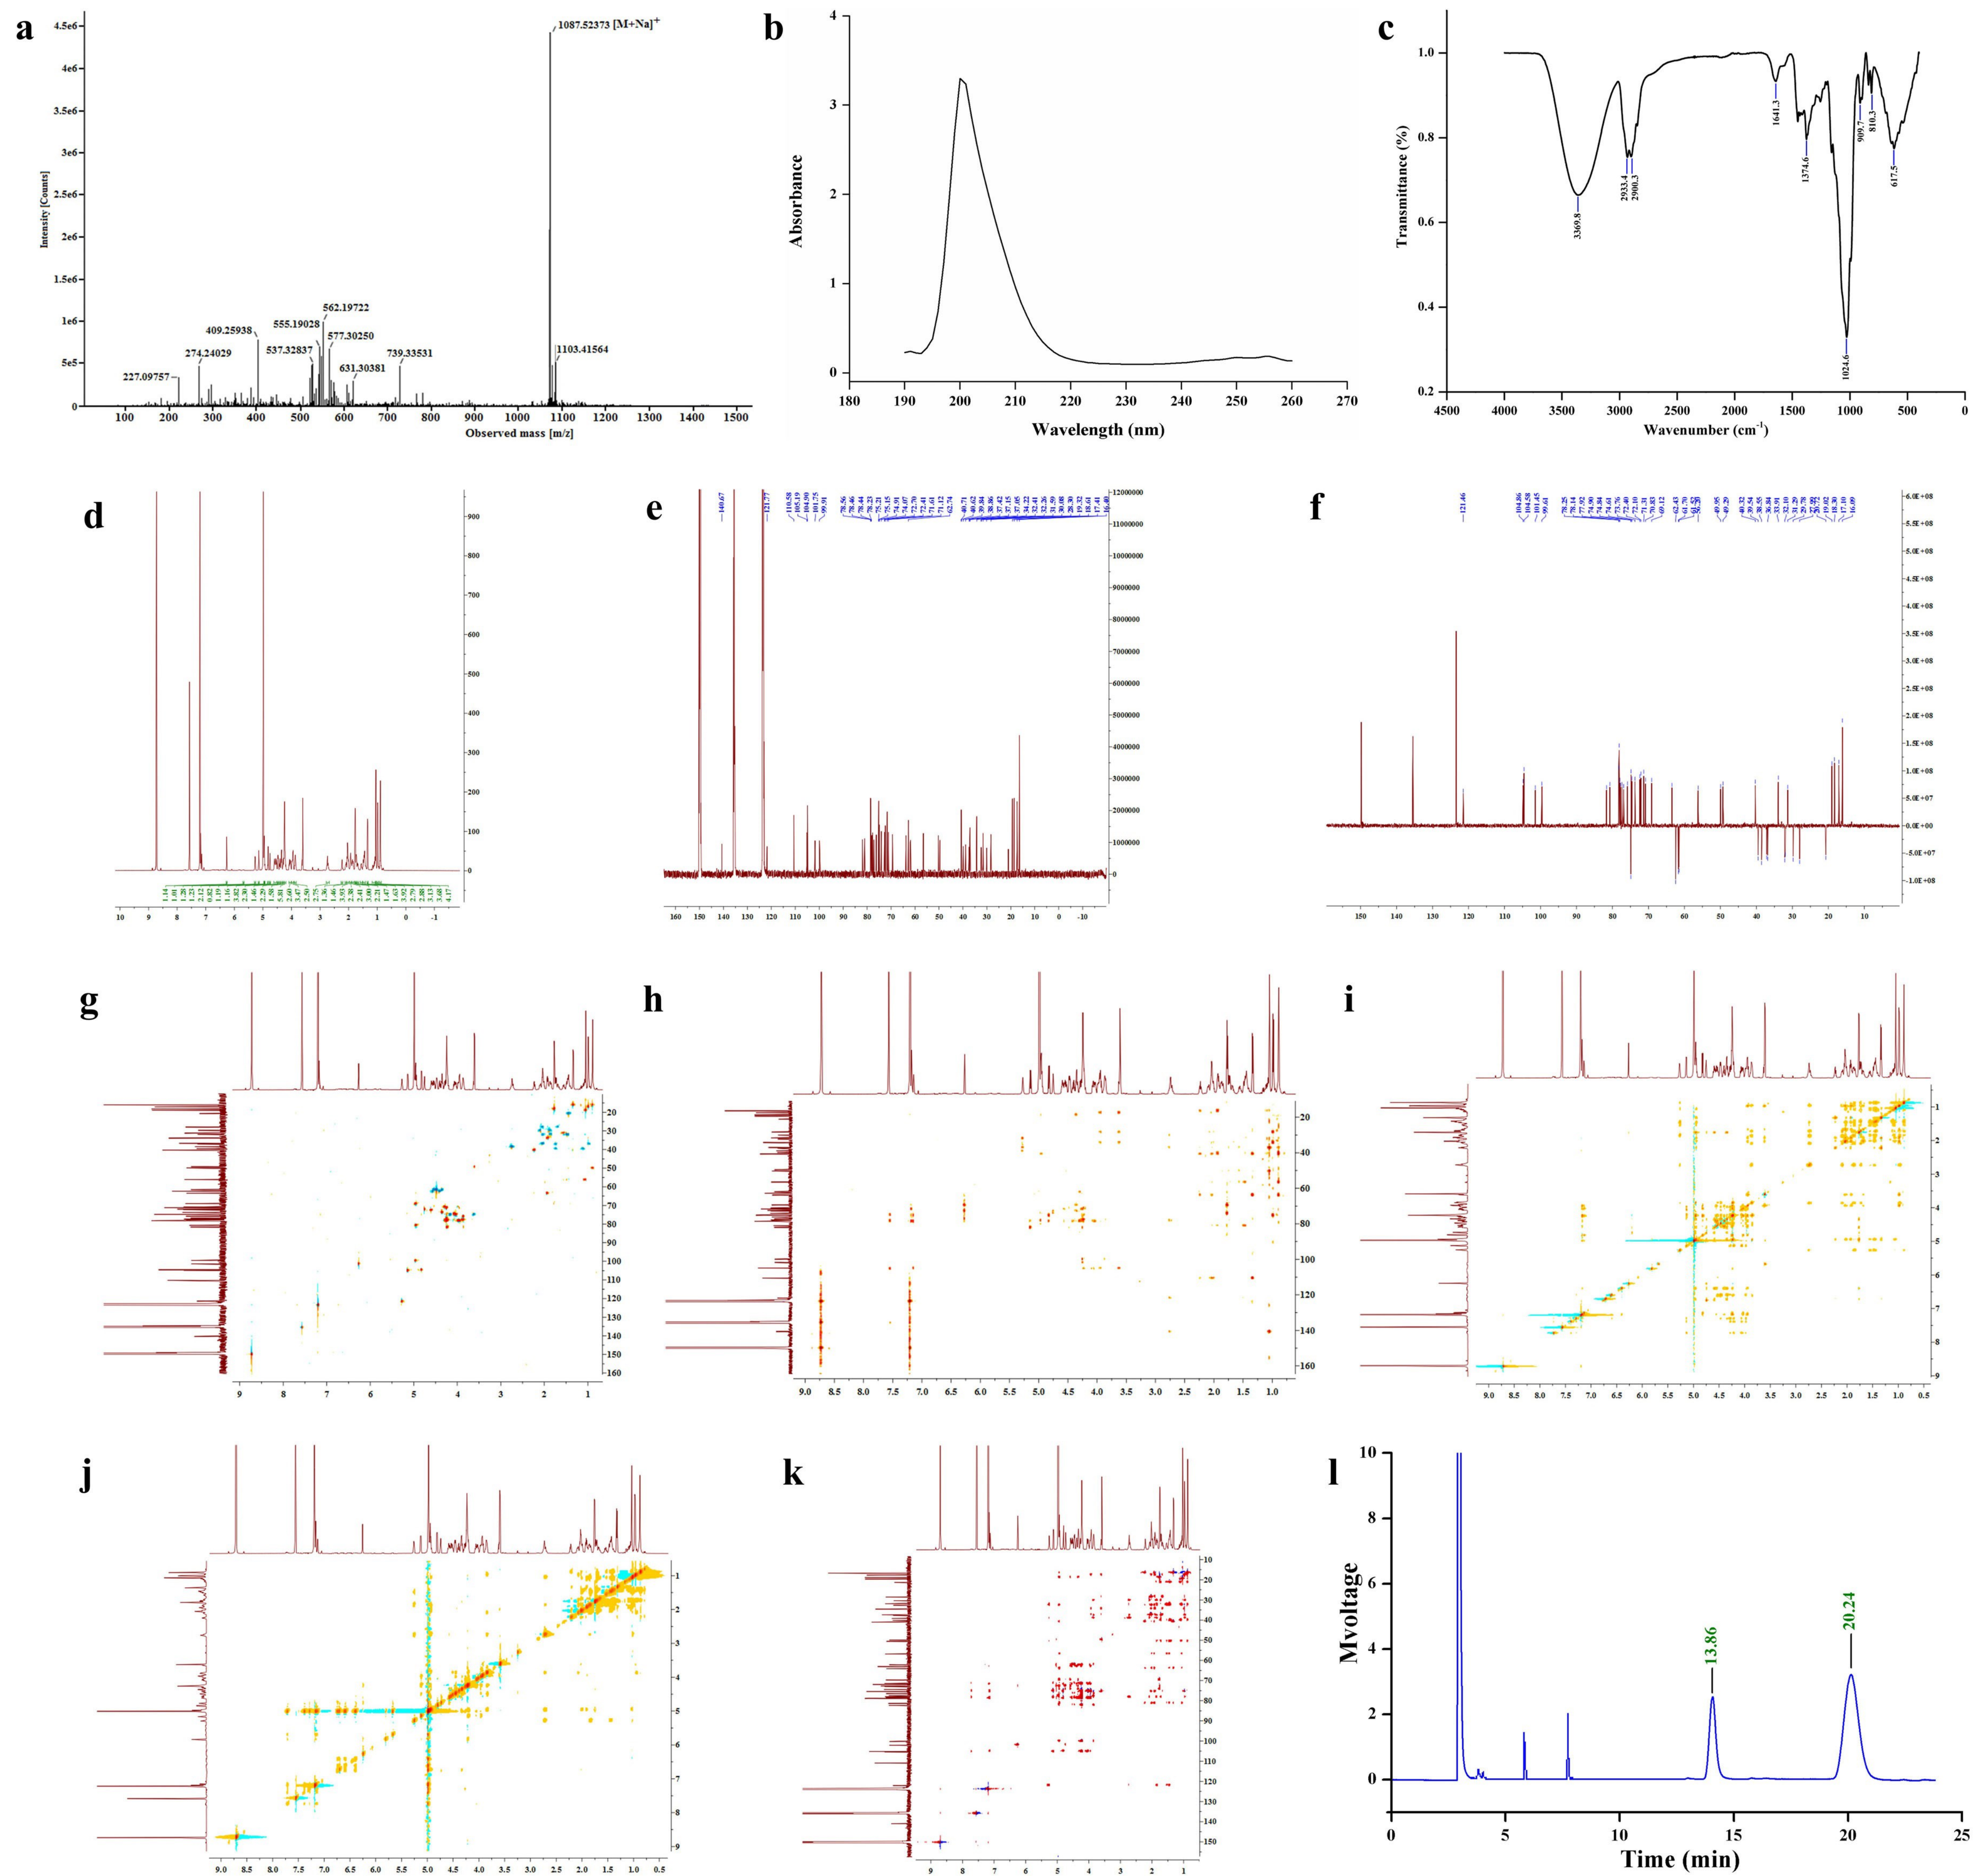

Supplement: d1fo01301g12.pdf [file d1fo01301g12.pdf]

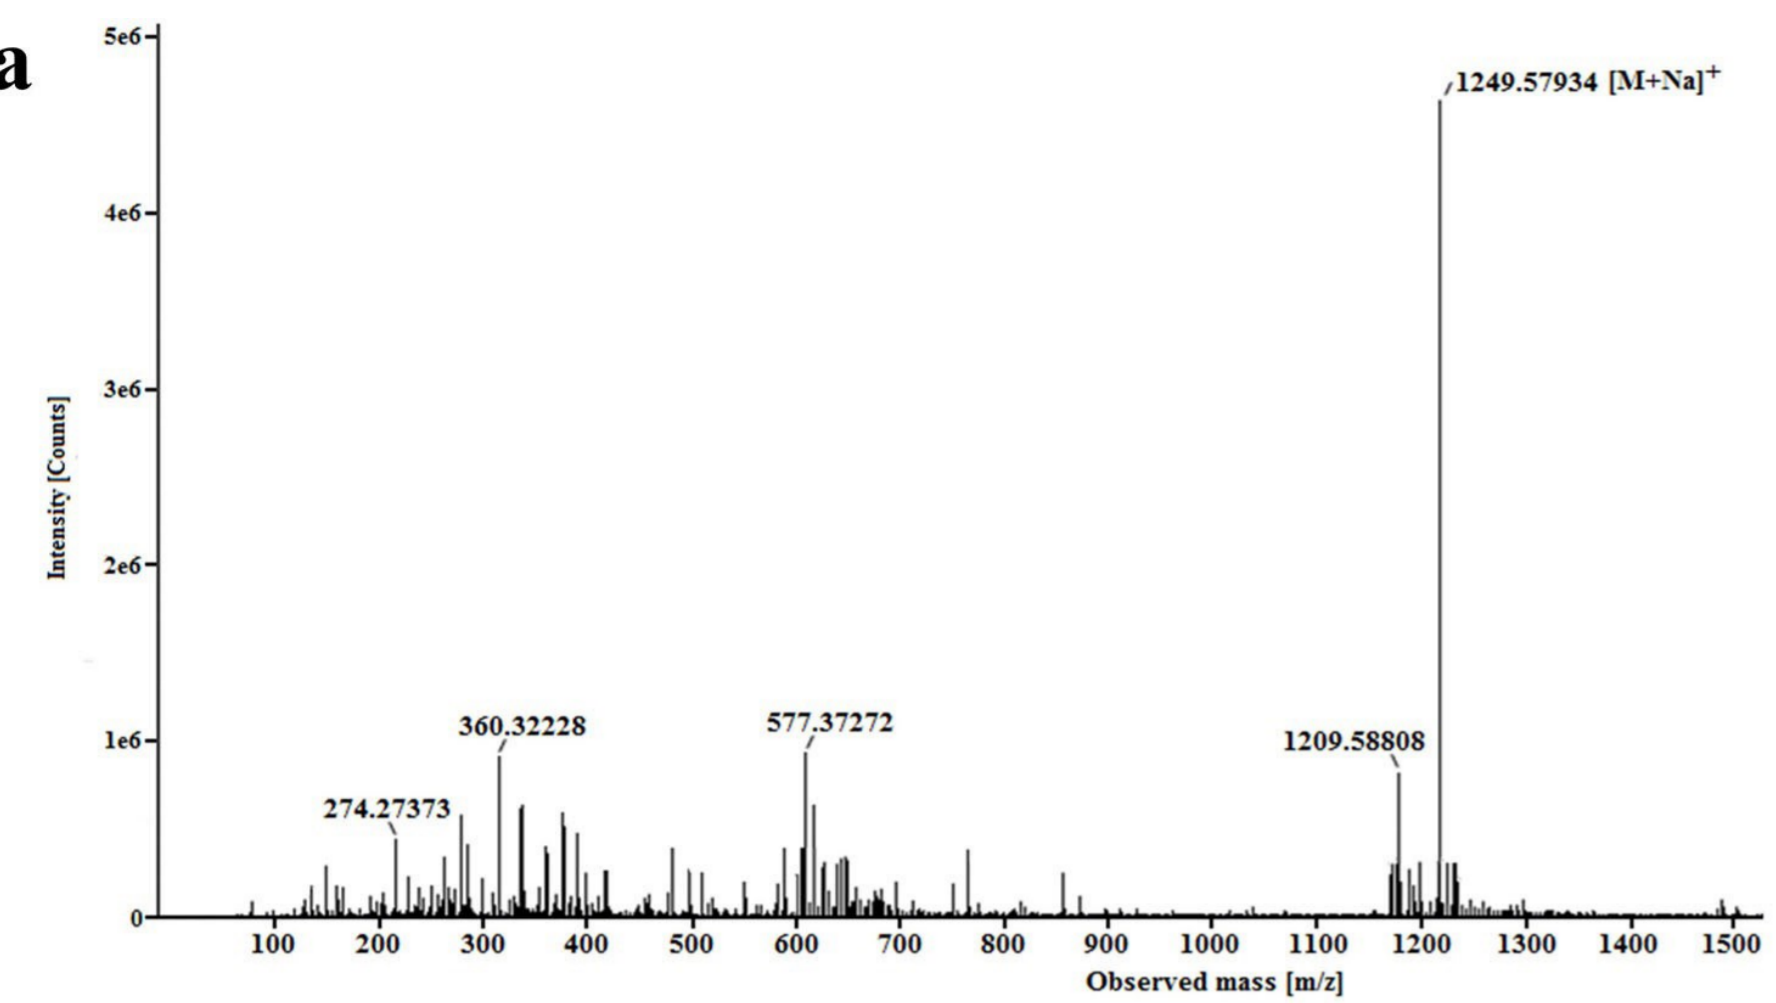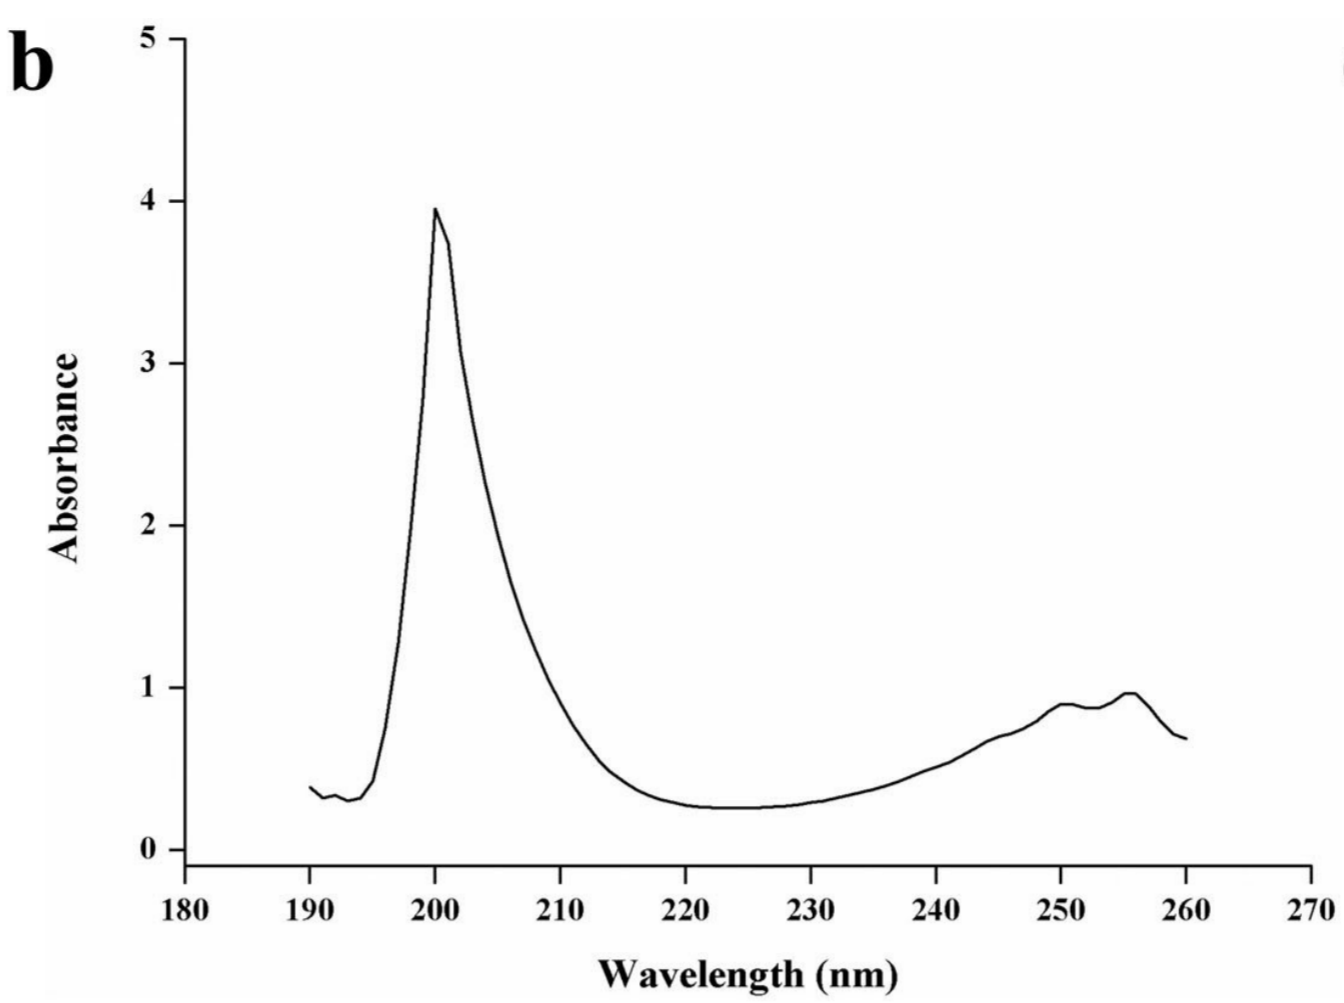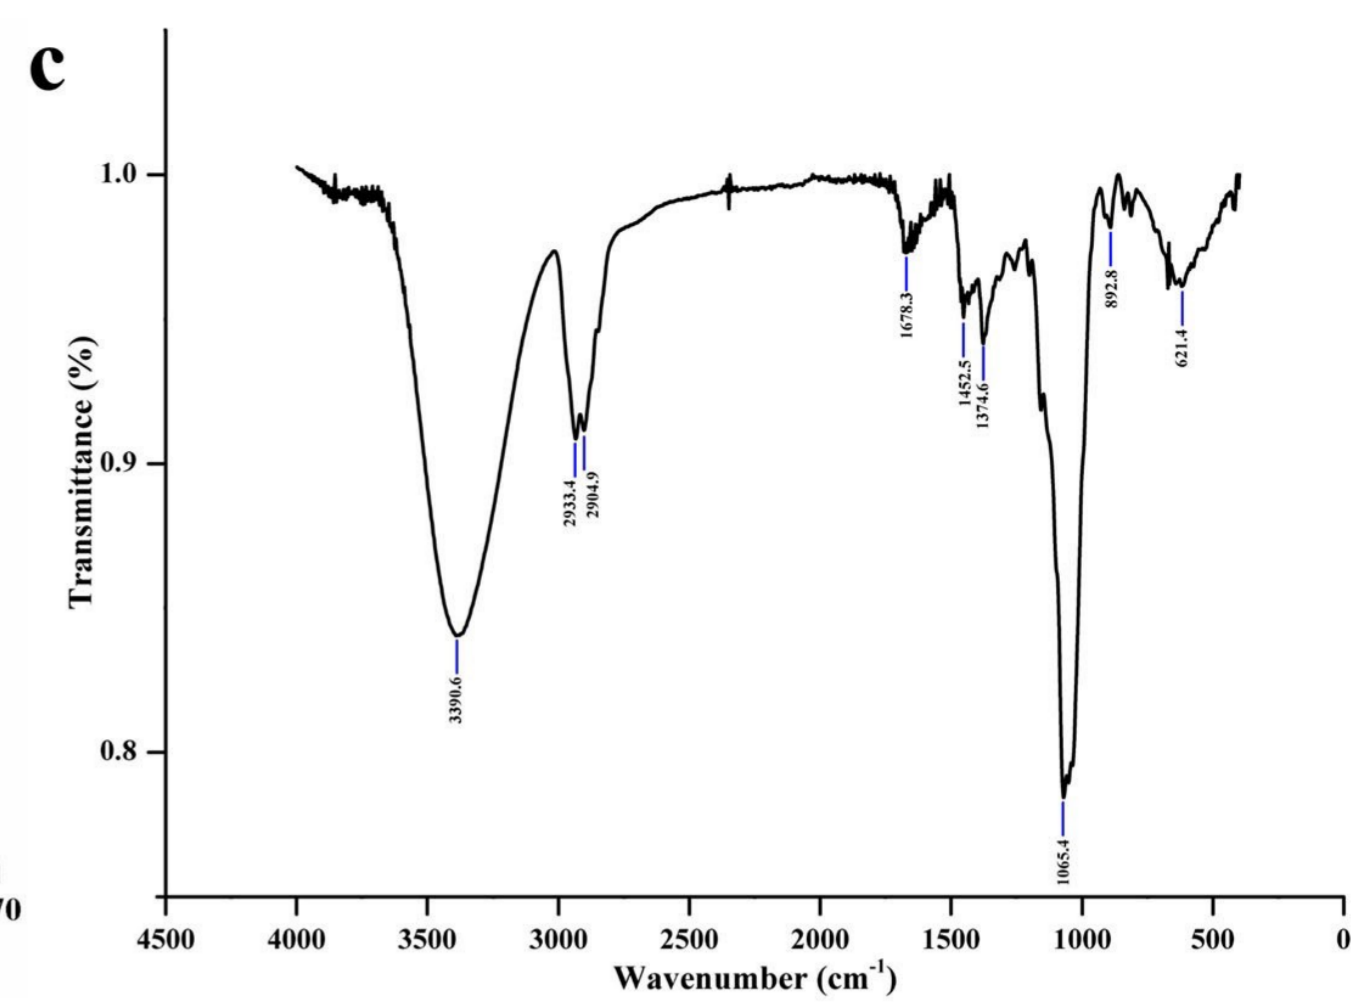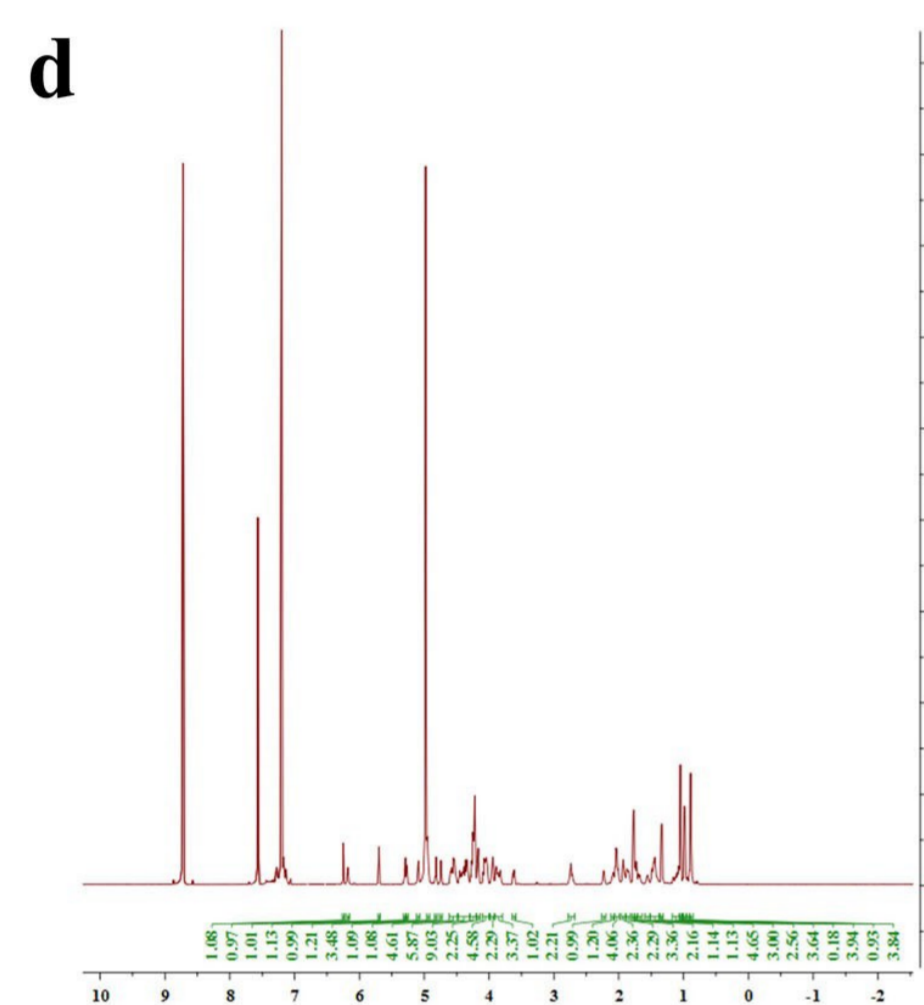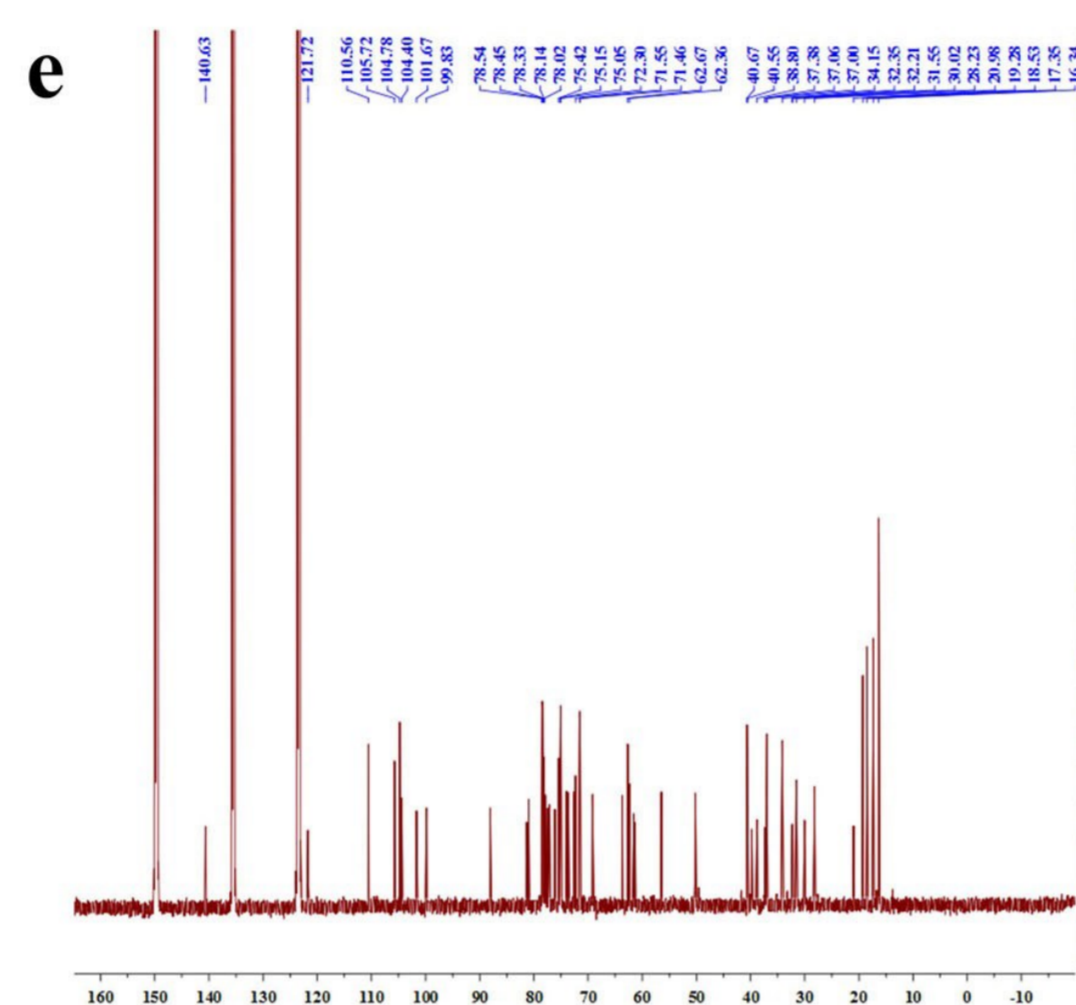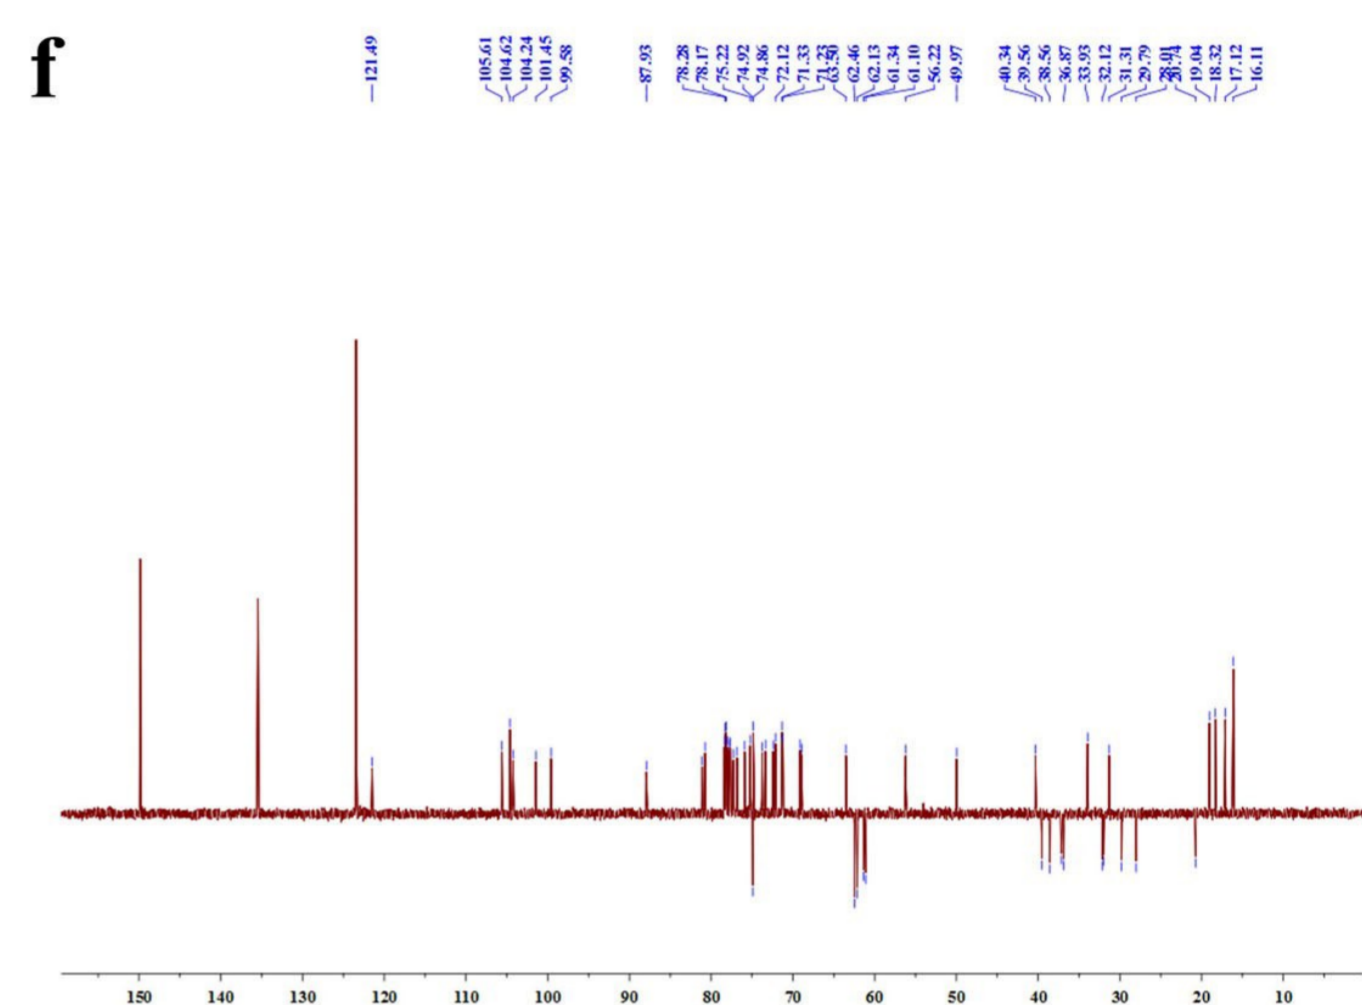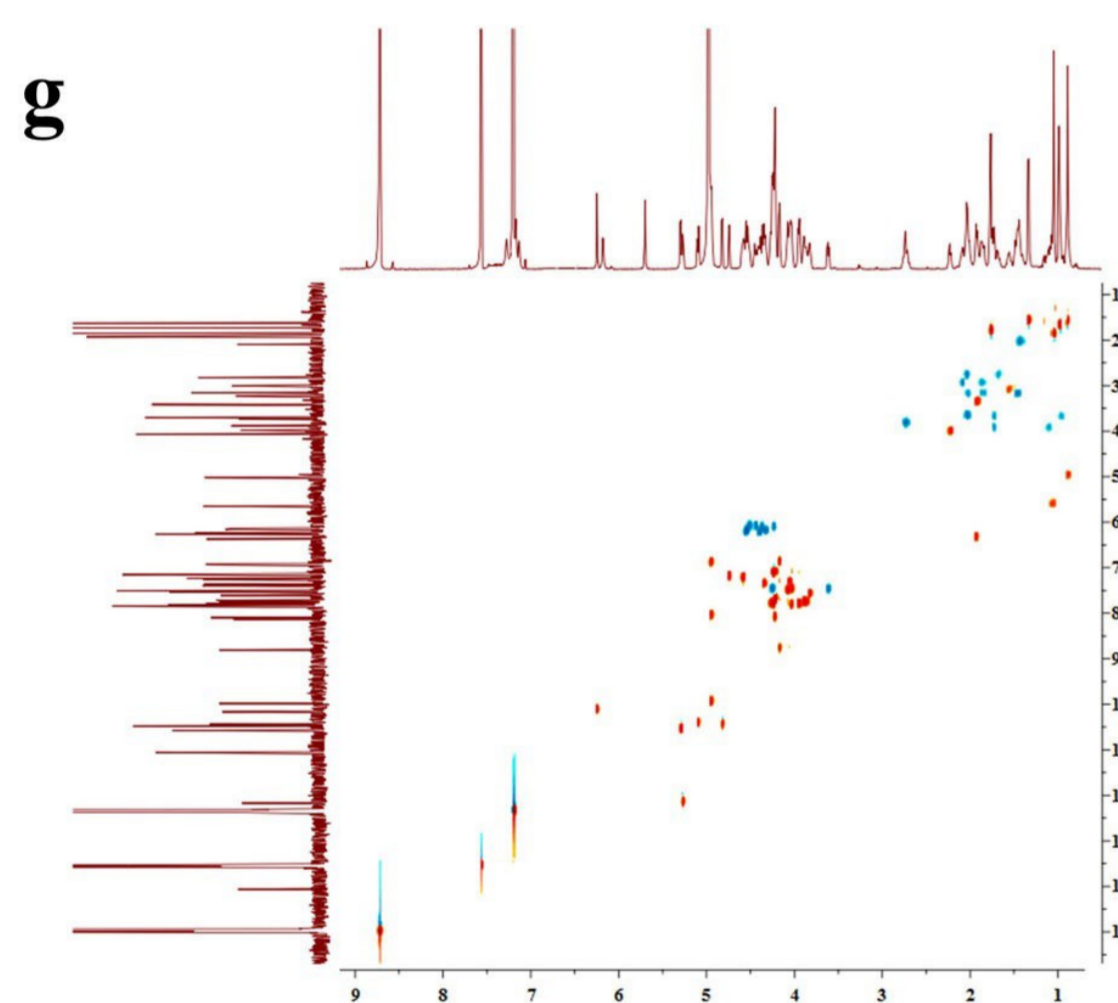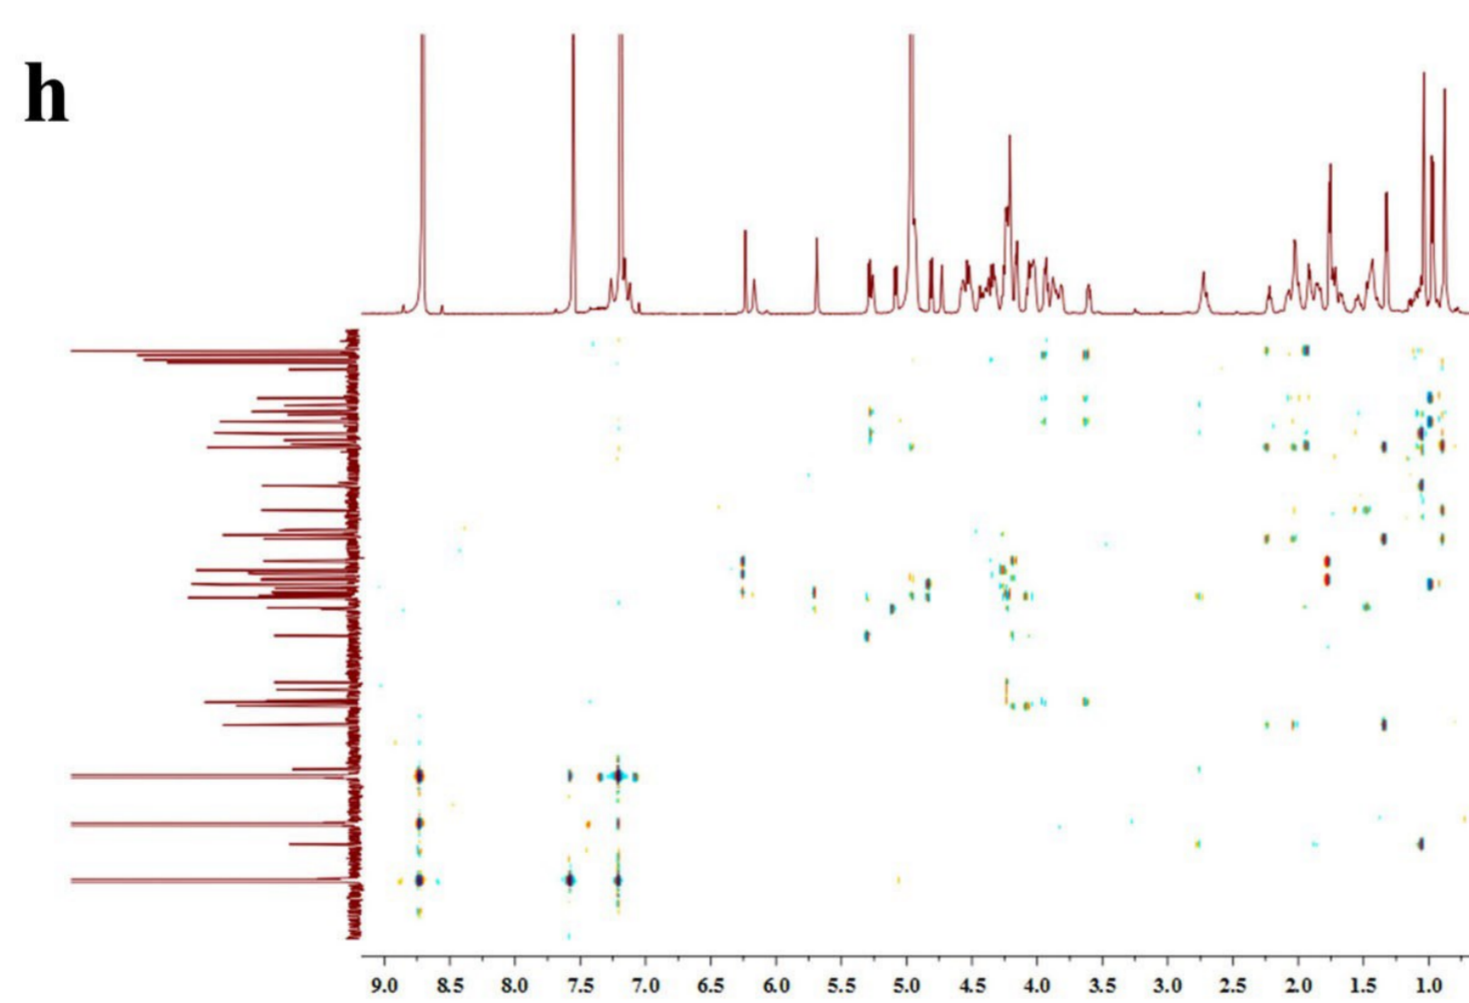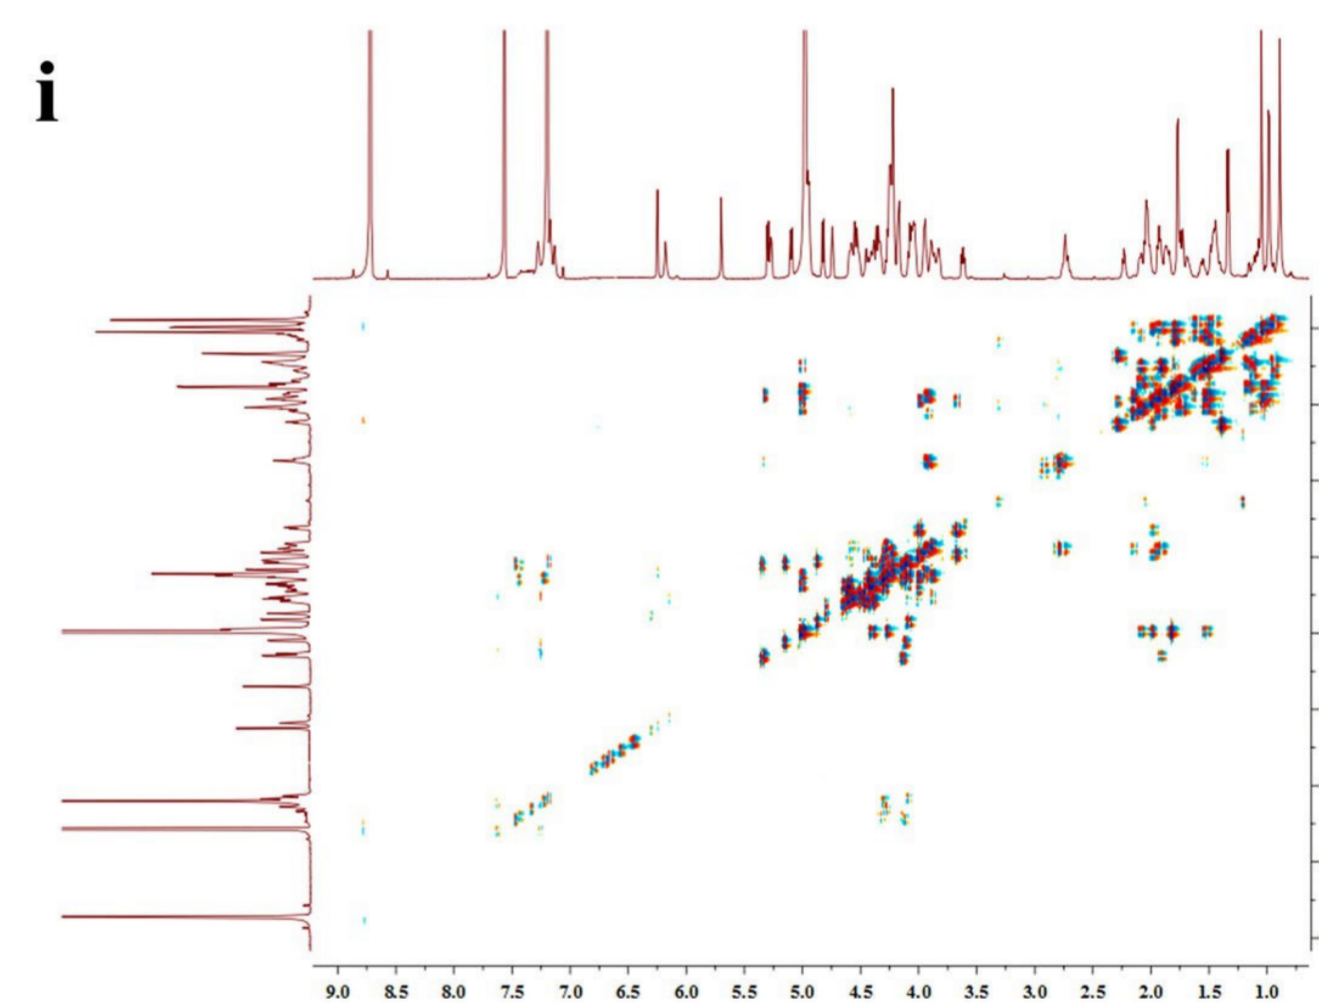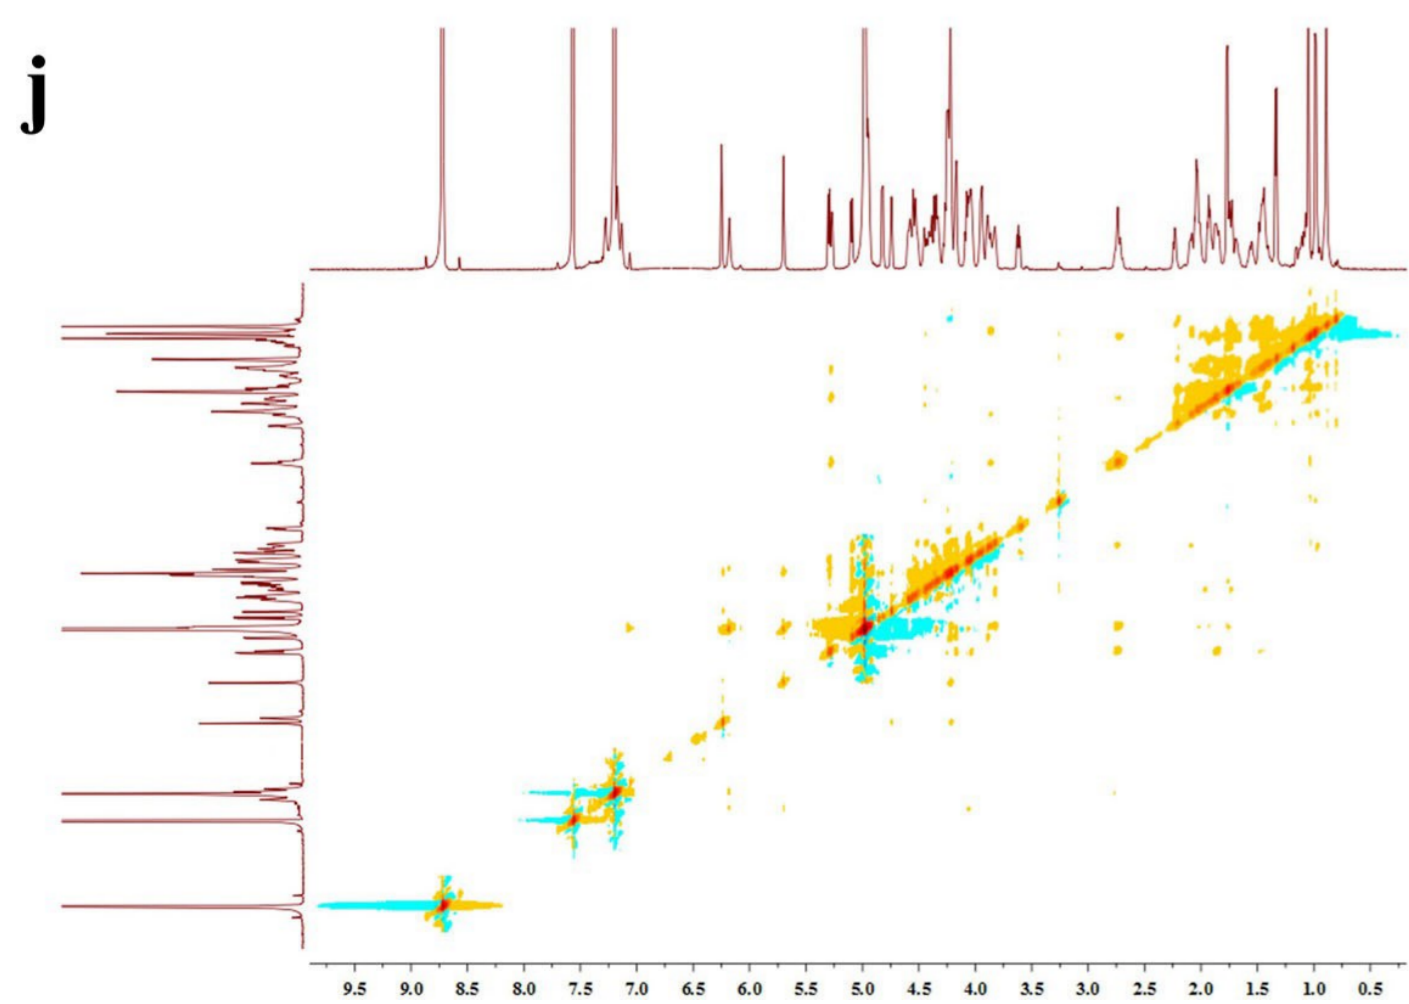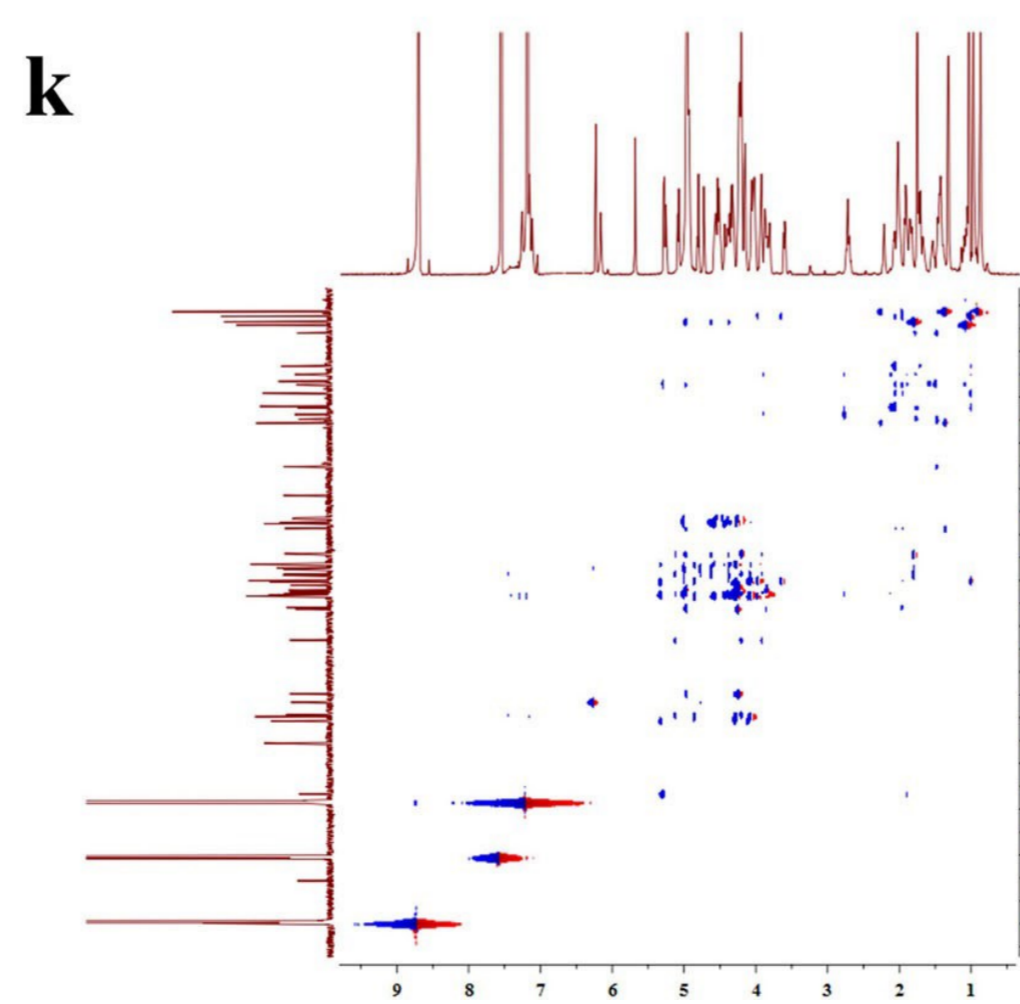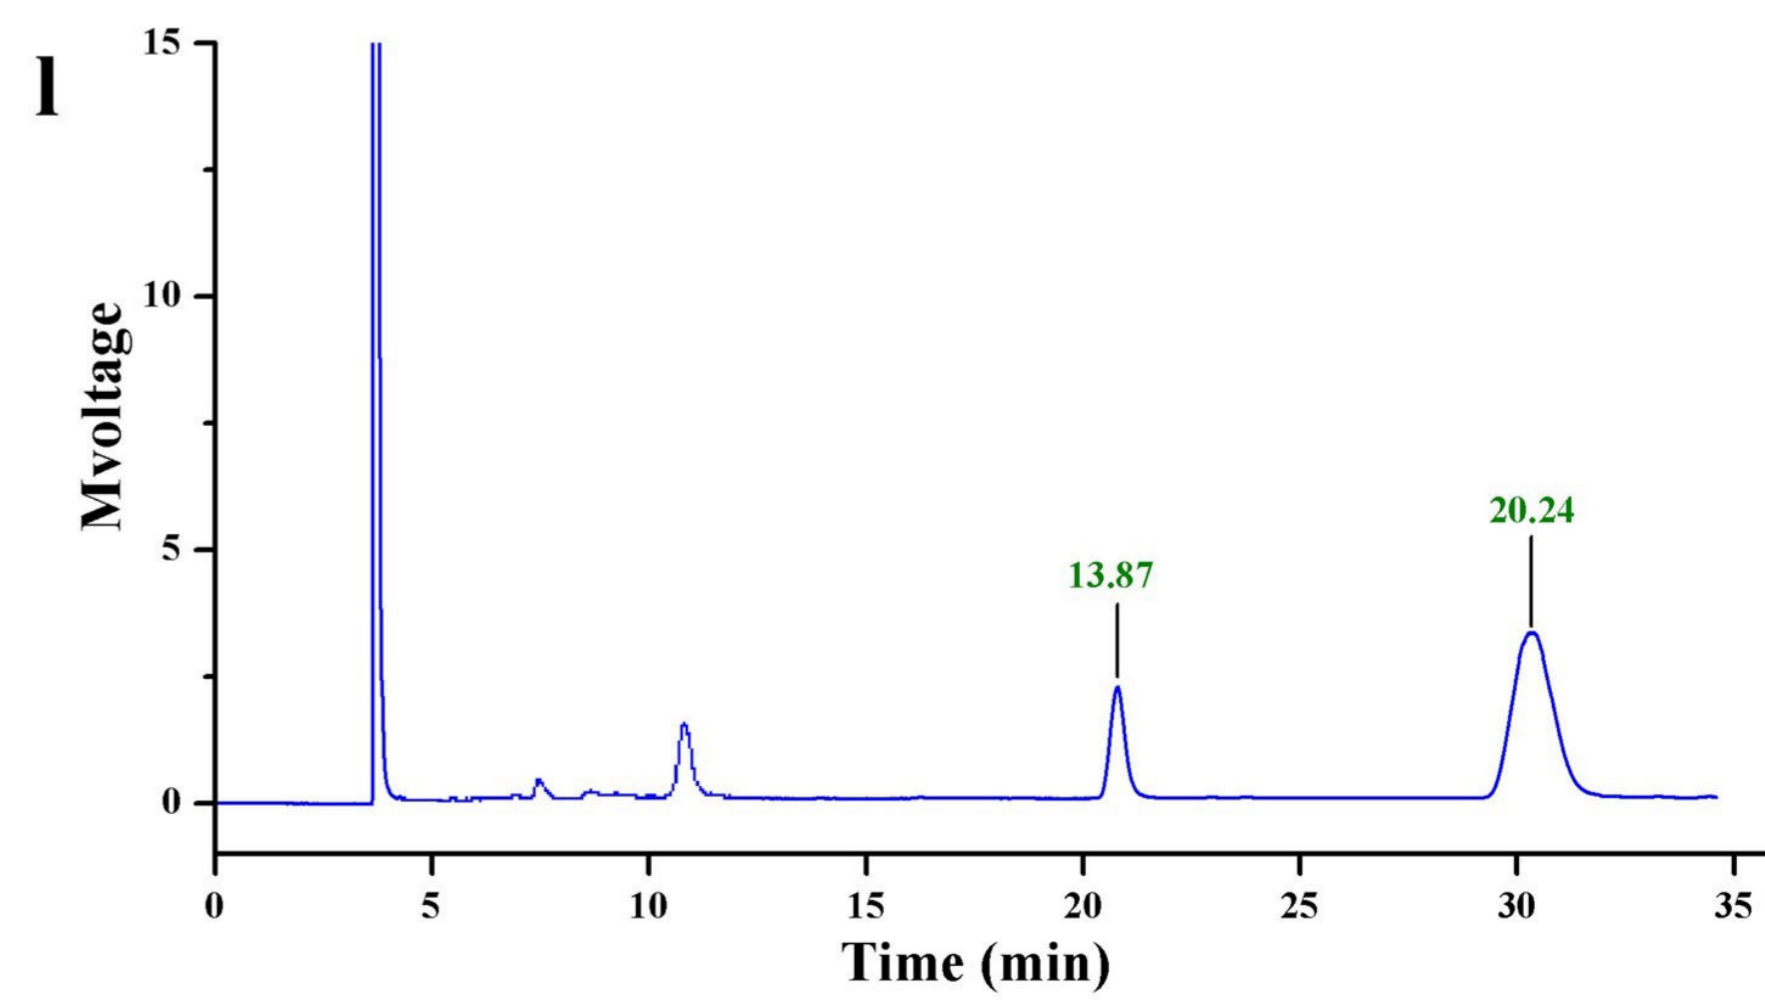

Supplement: d1fo01301g3.pdf [file d1fo01301g3.pdf]

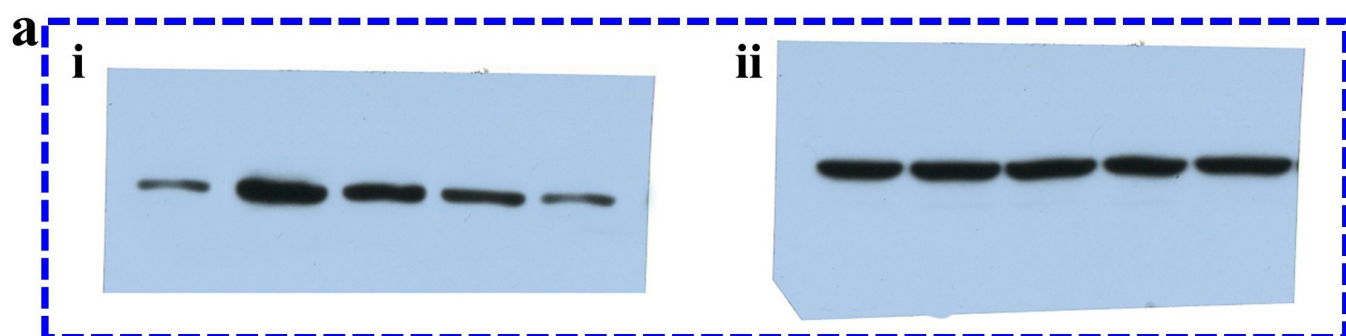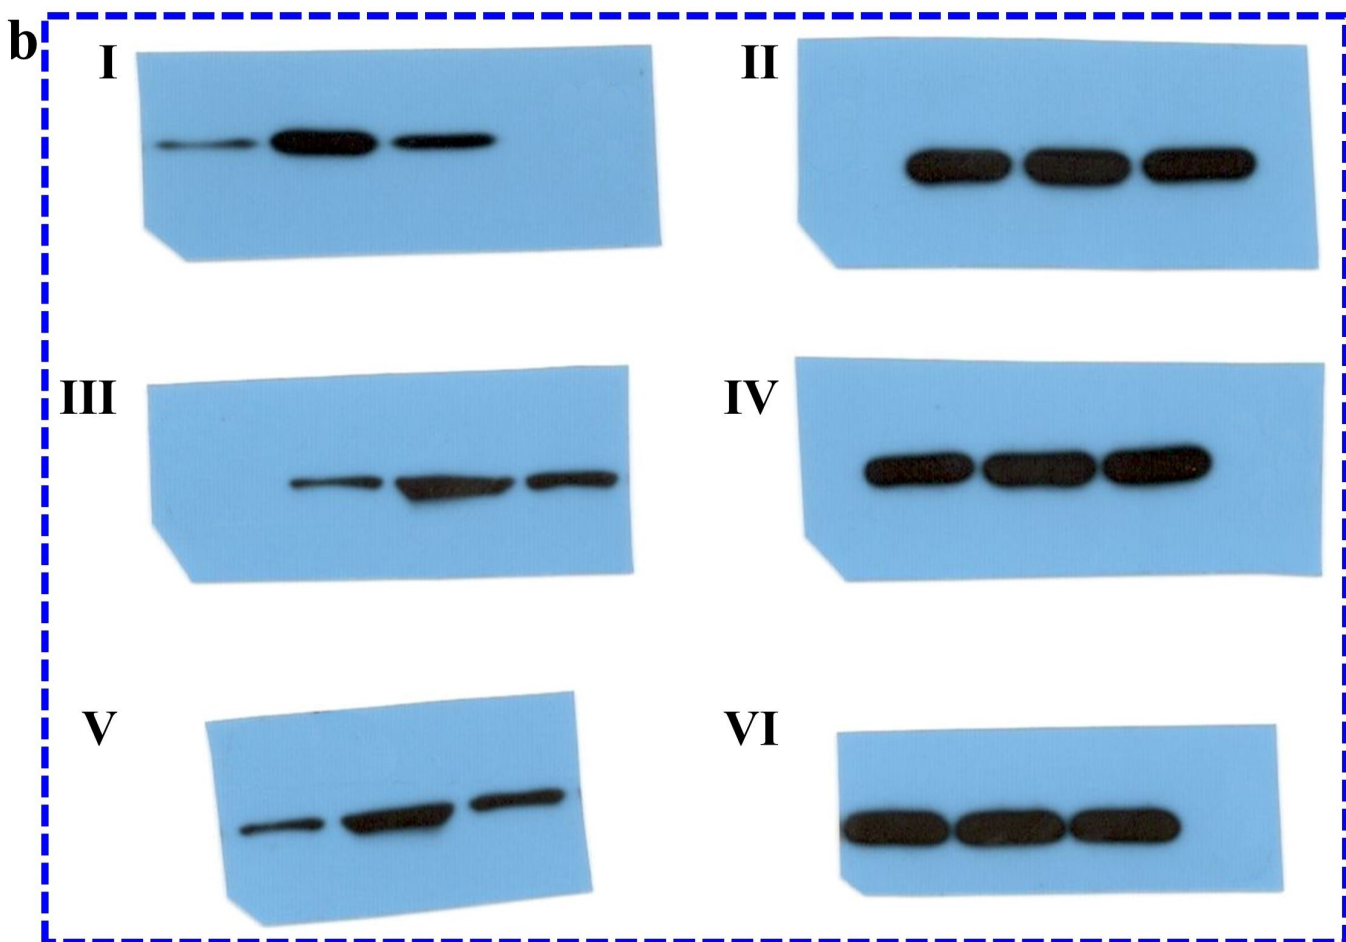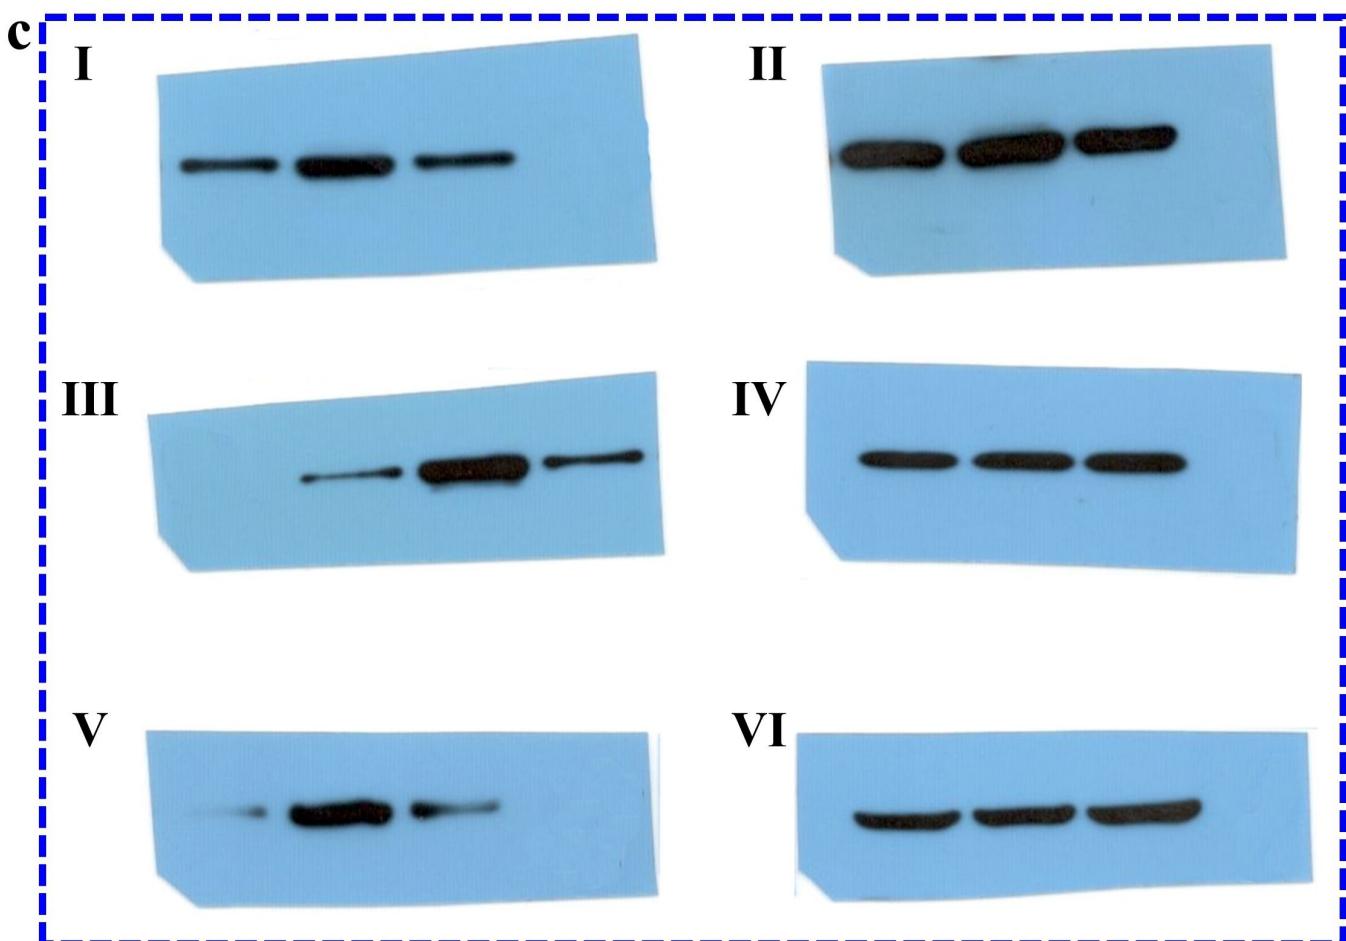

Supplement: d1fo01301g4.pdf [file d1fo01301g4.pdf]

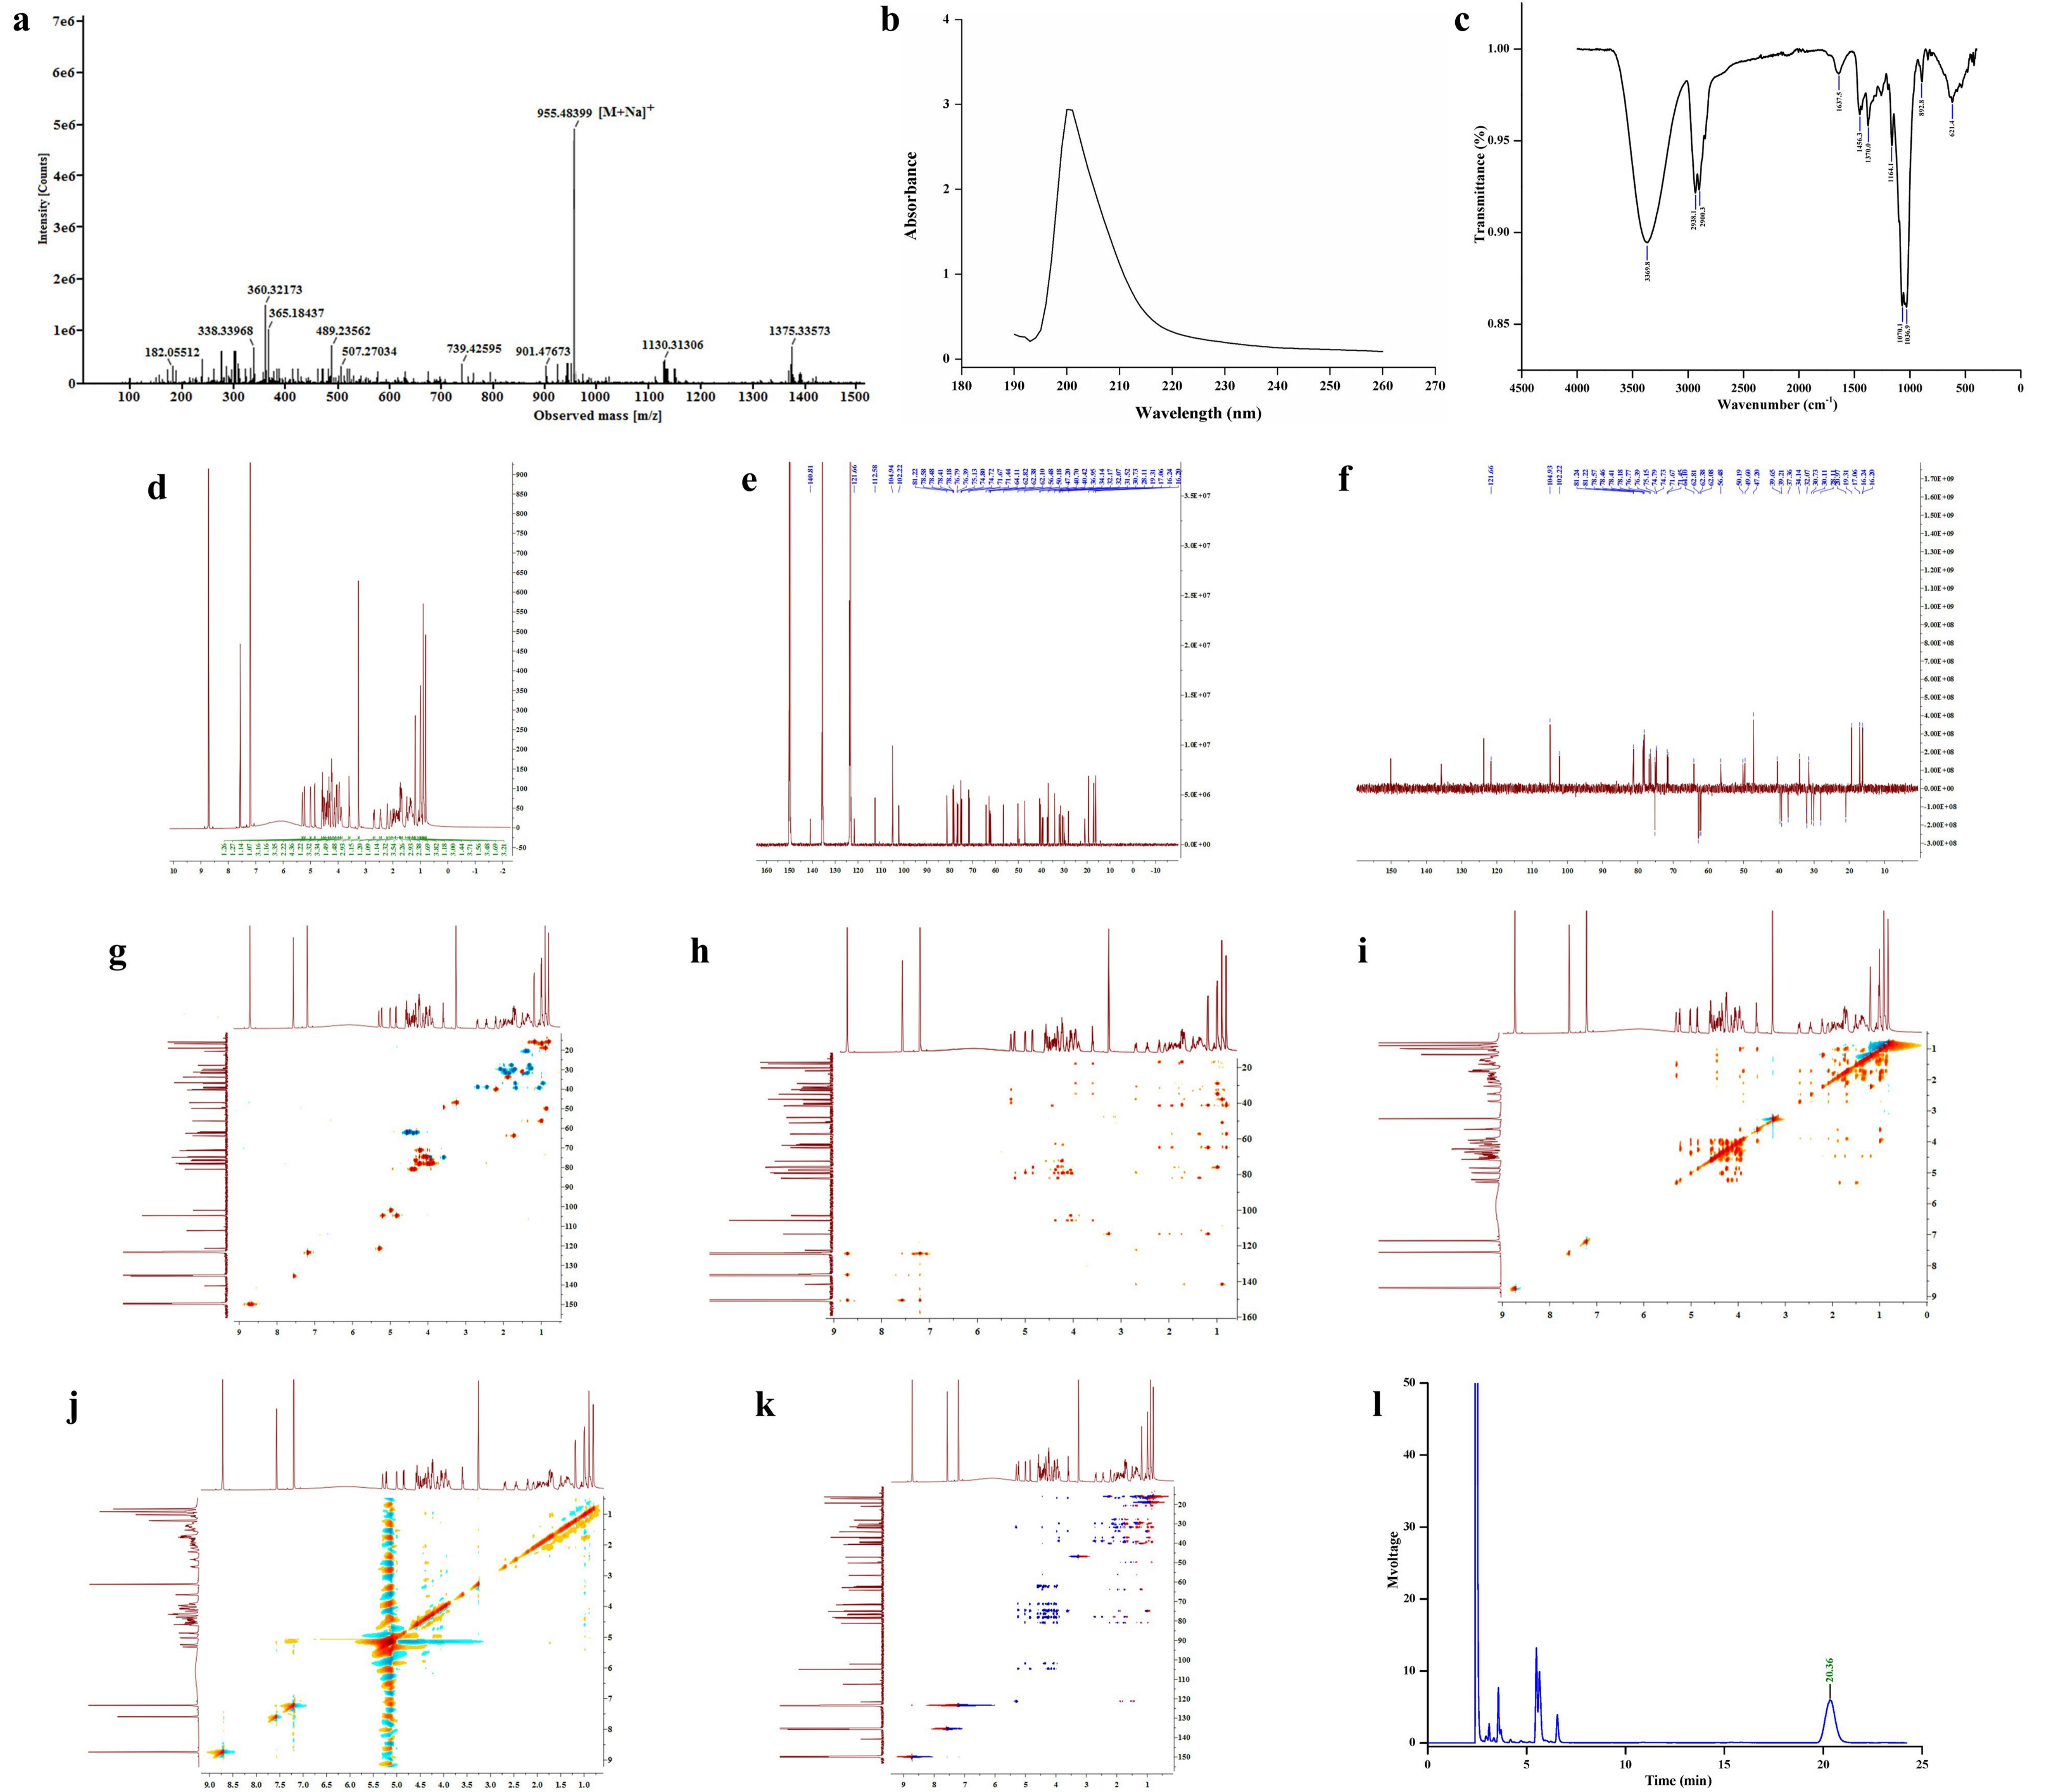

Supplement: d1fo01301g5.pdf [file d1fo01301g5.pdf]

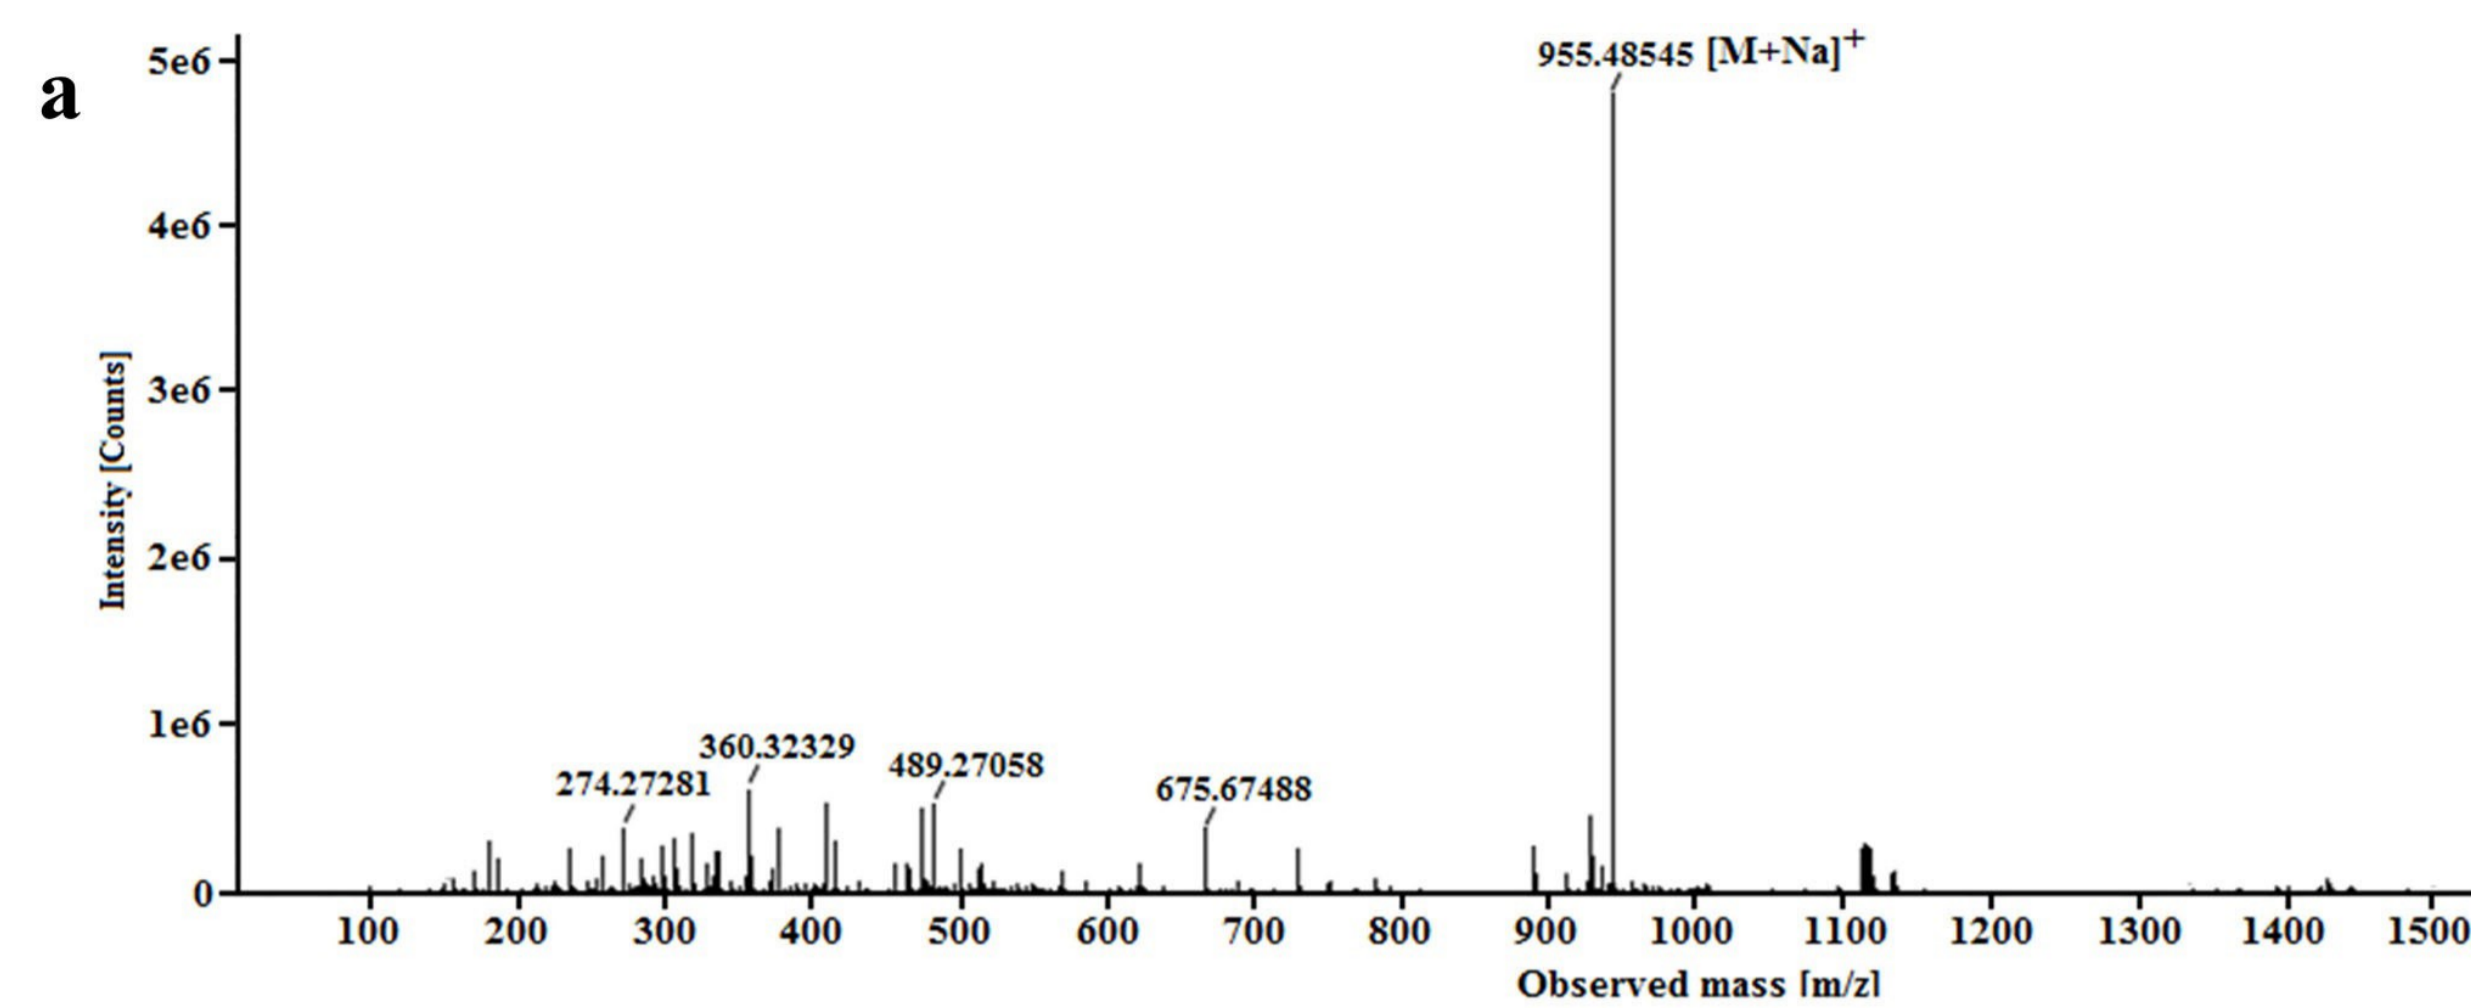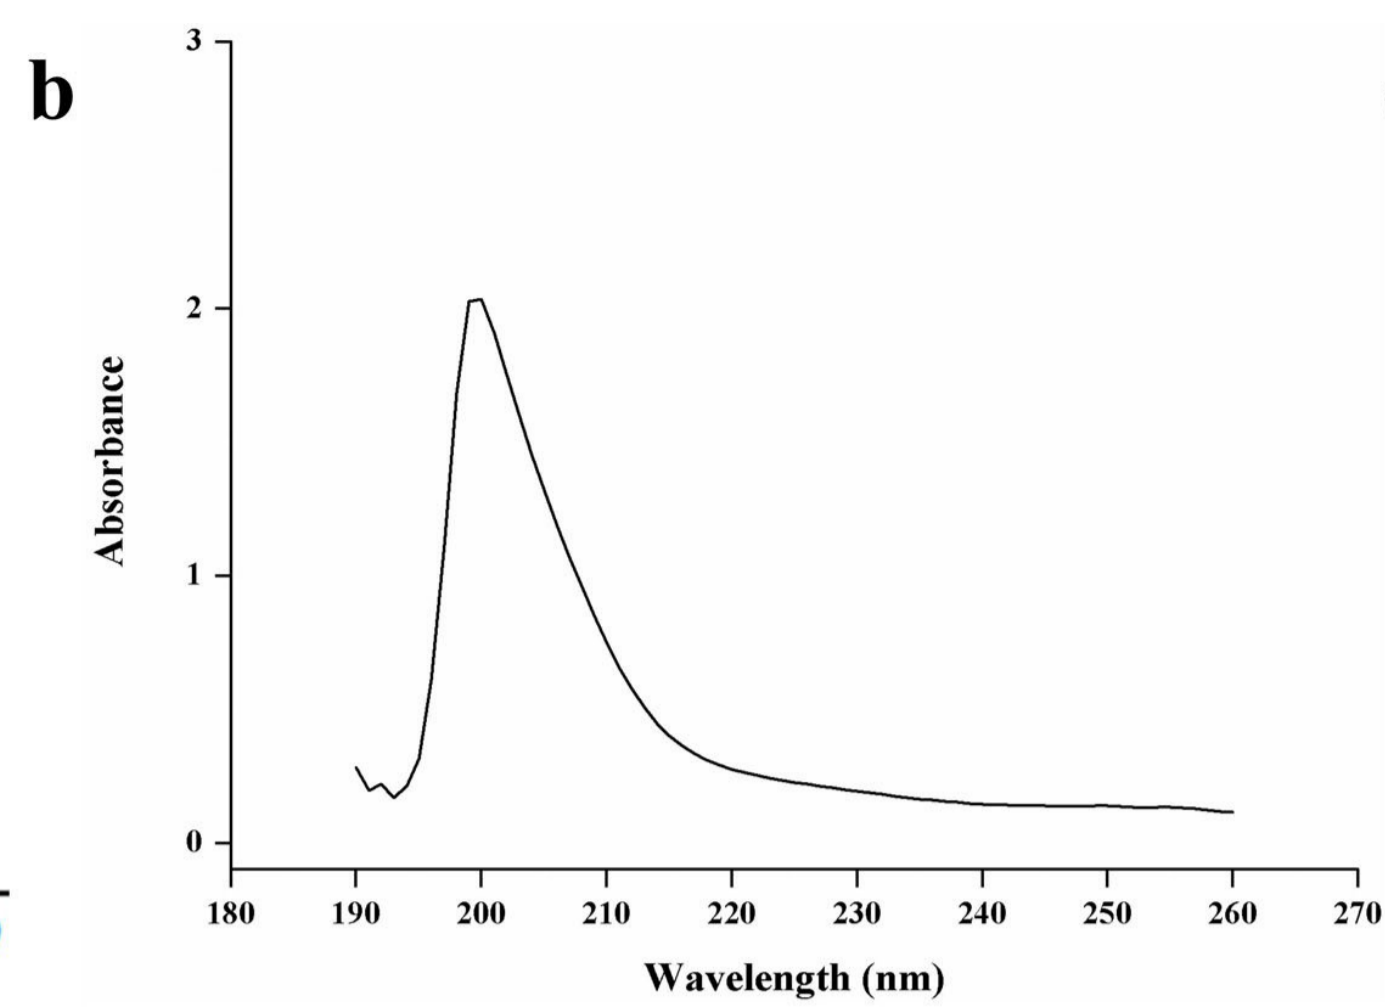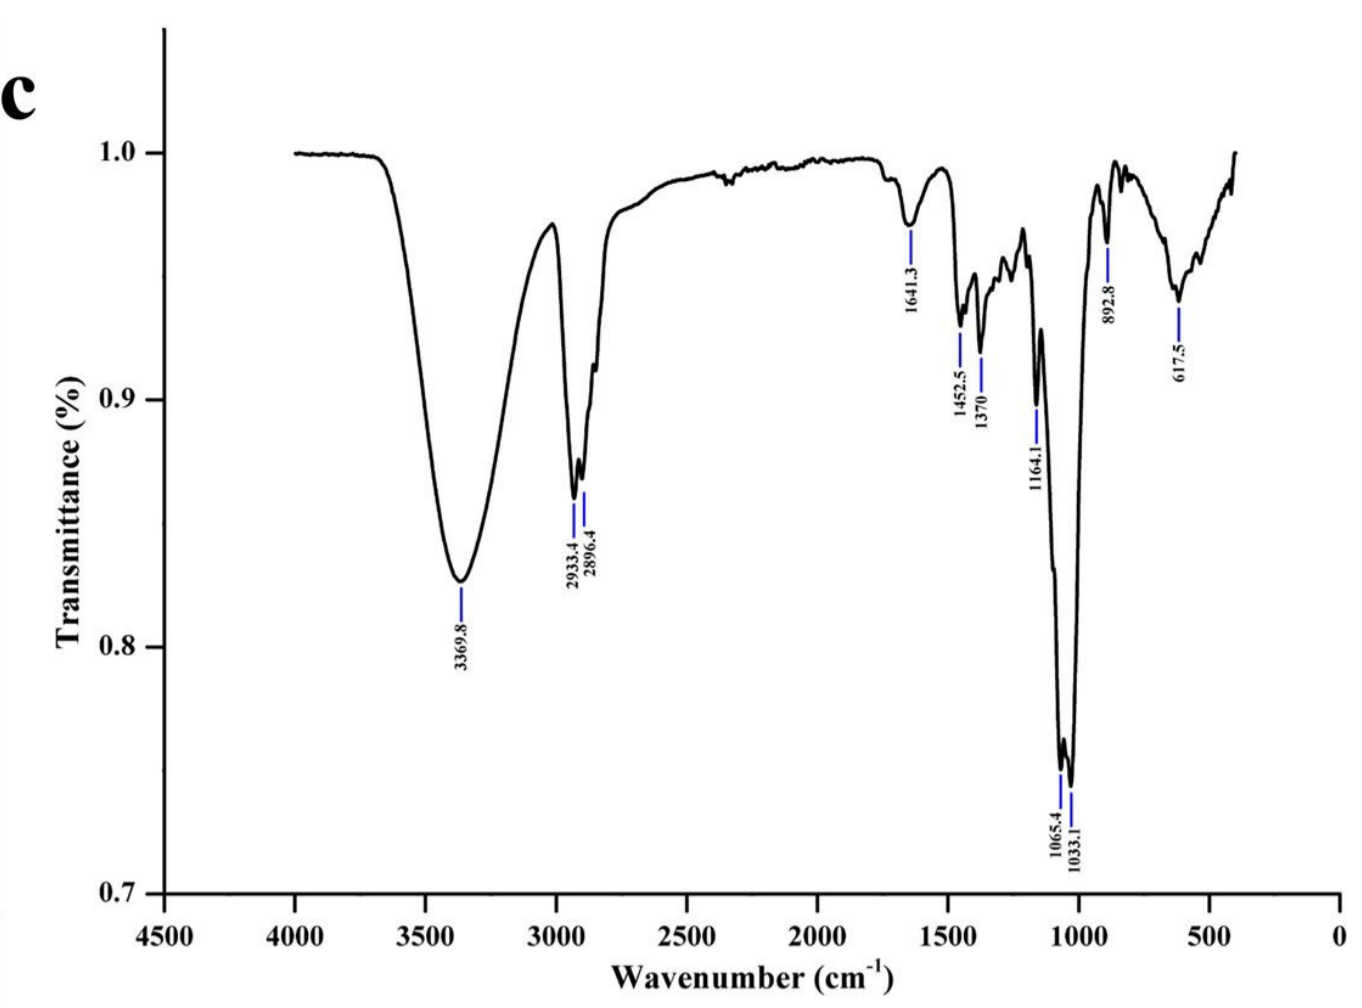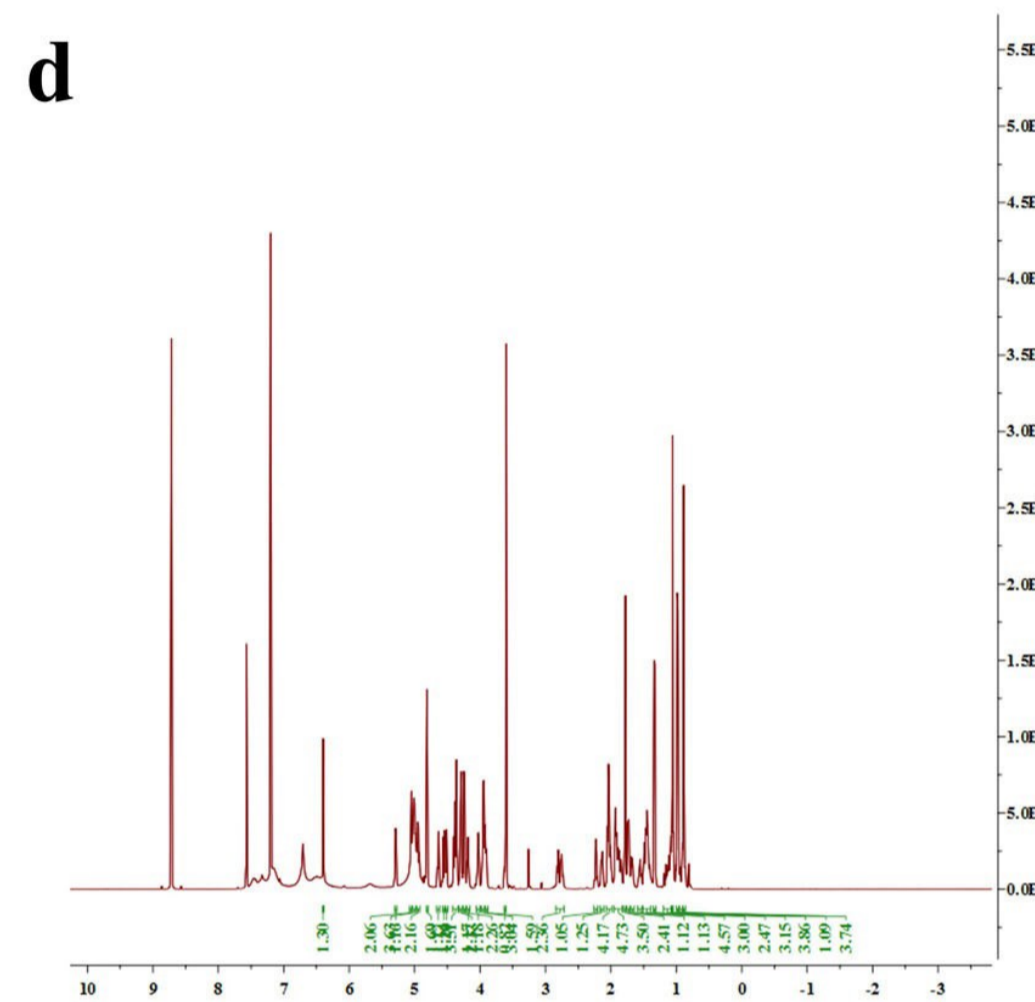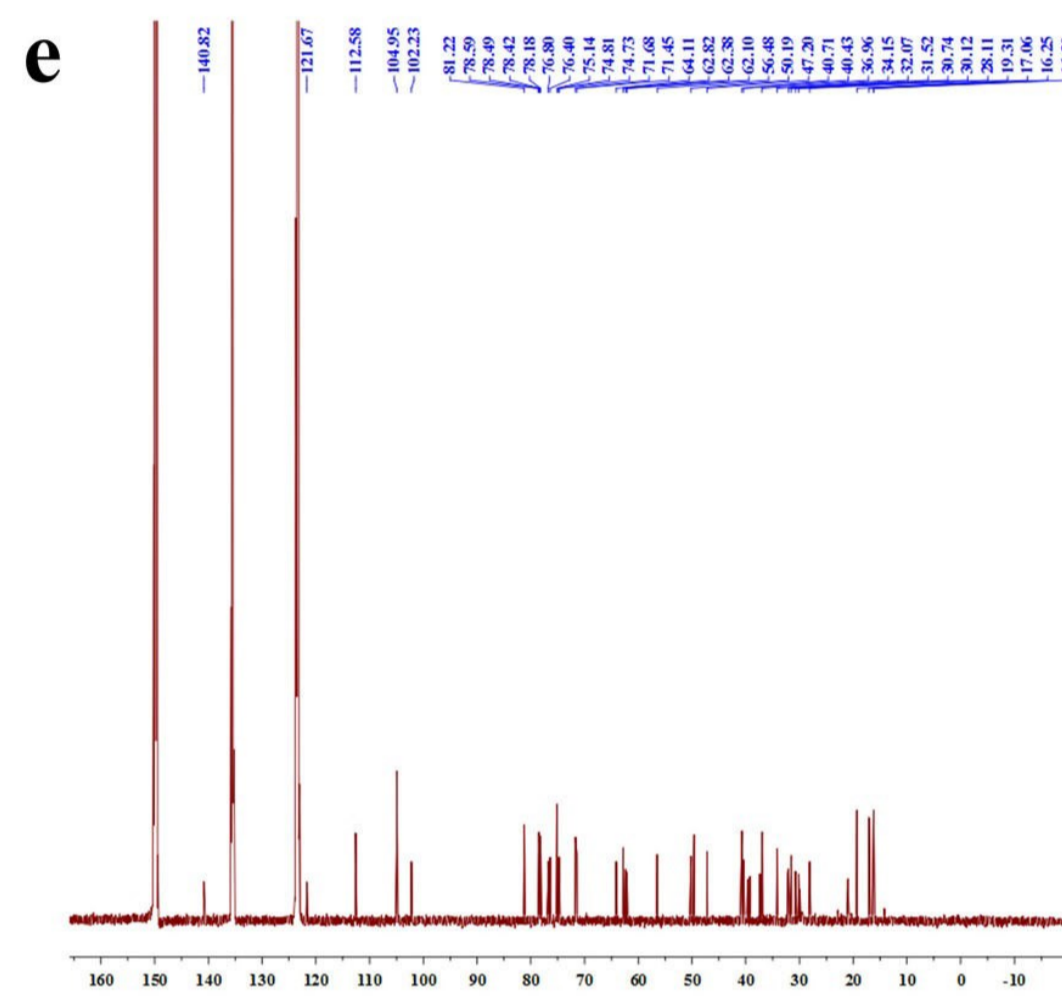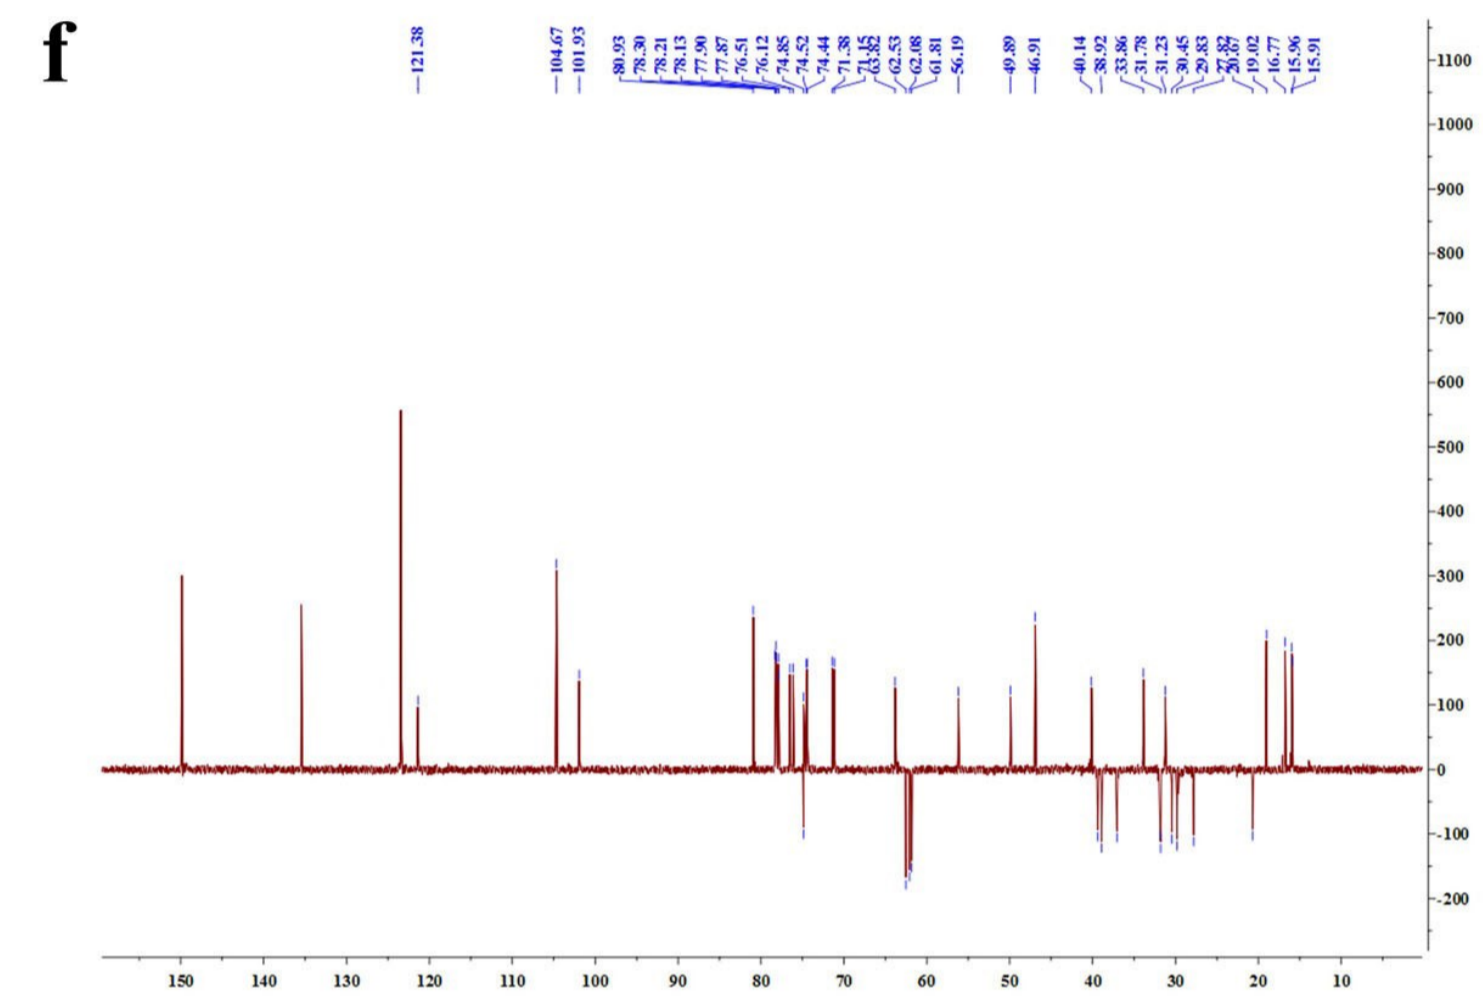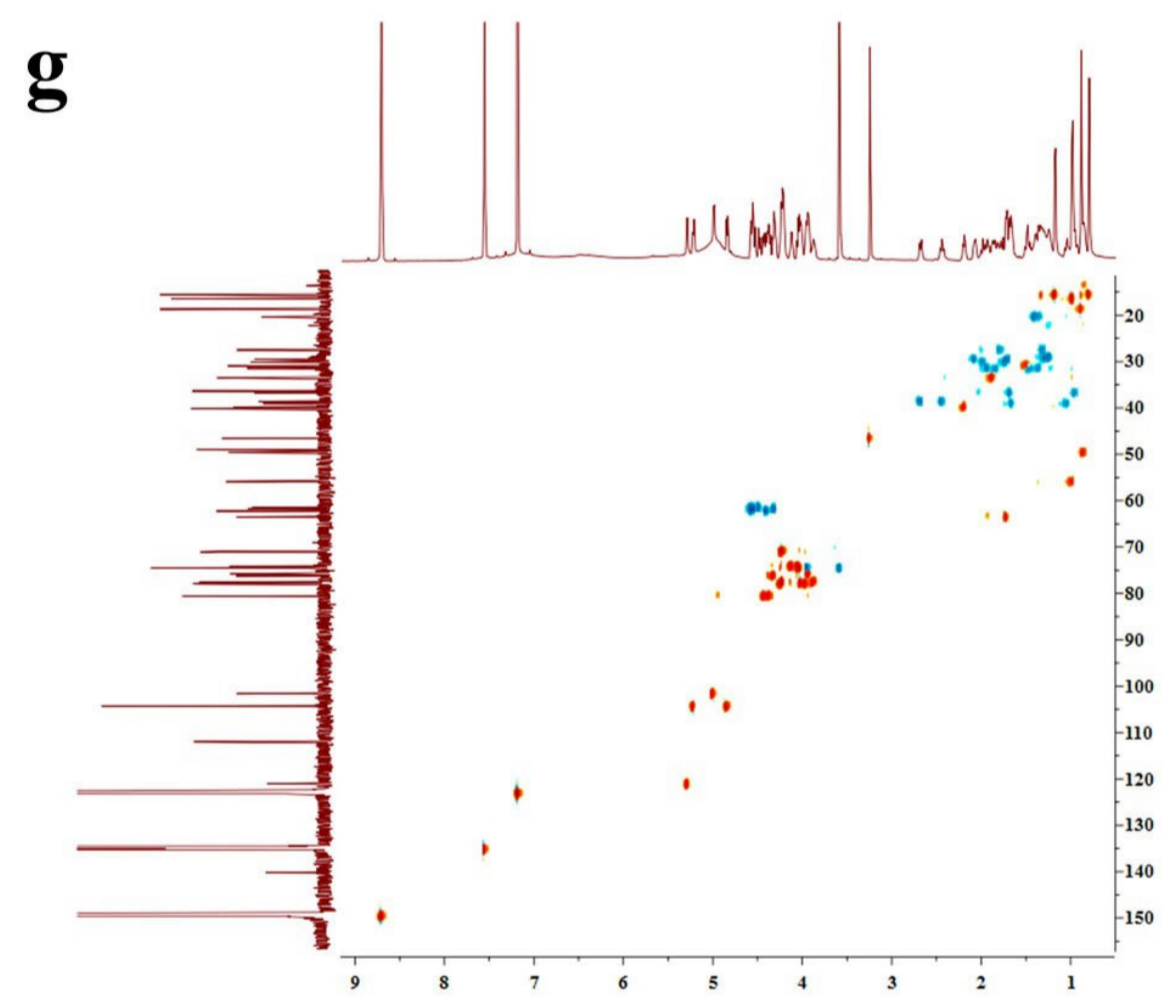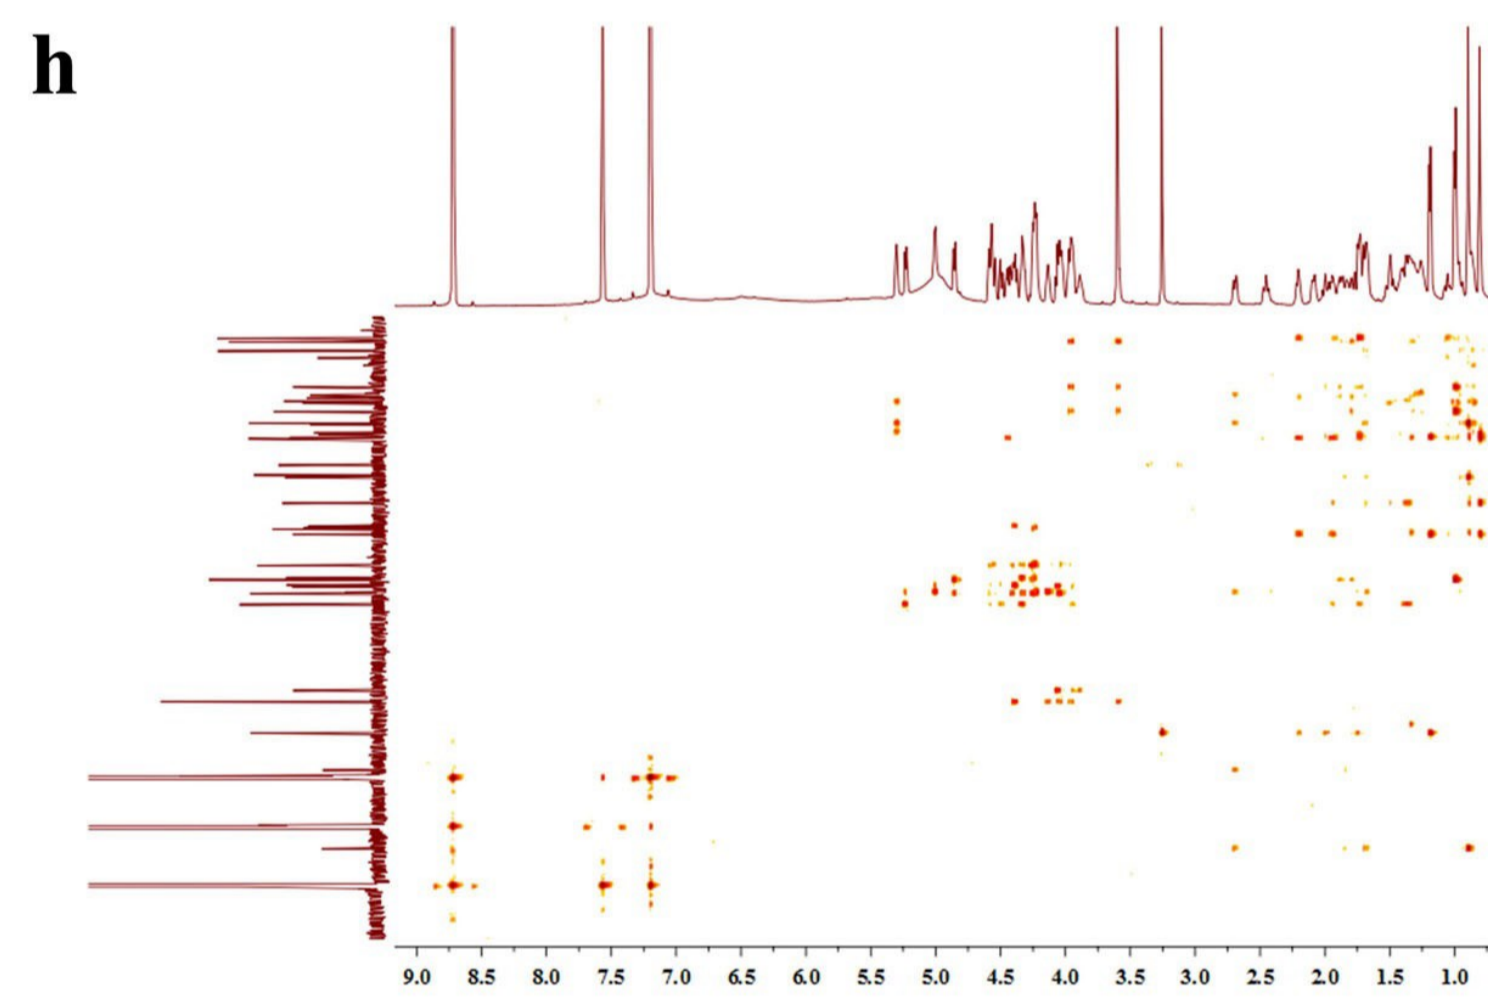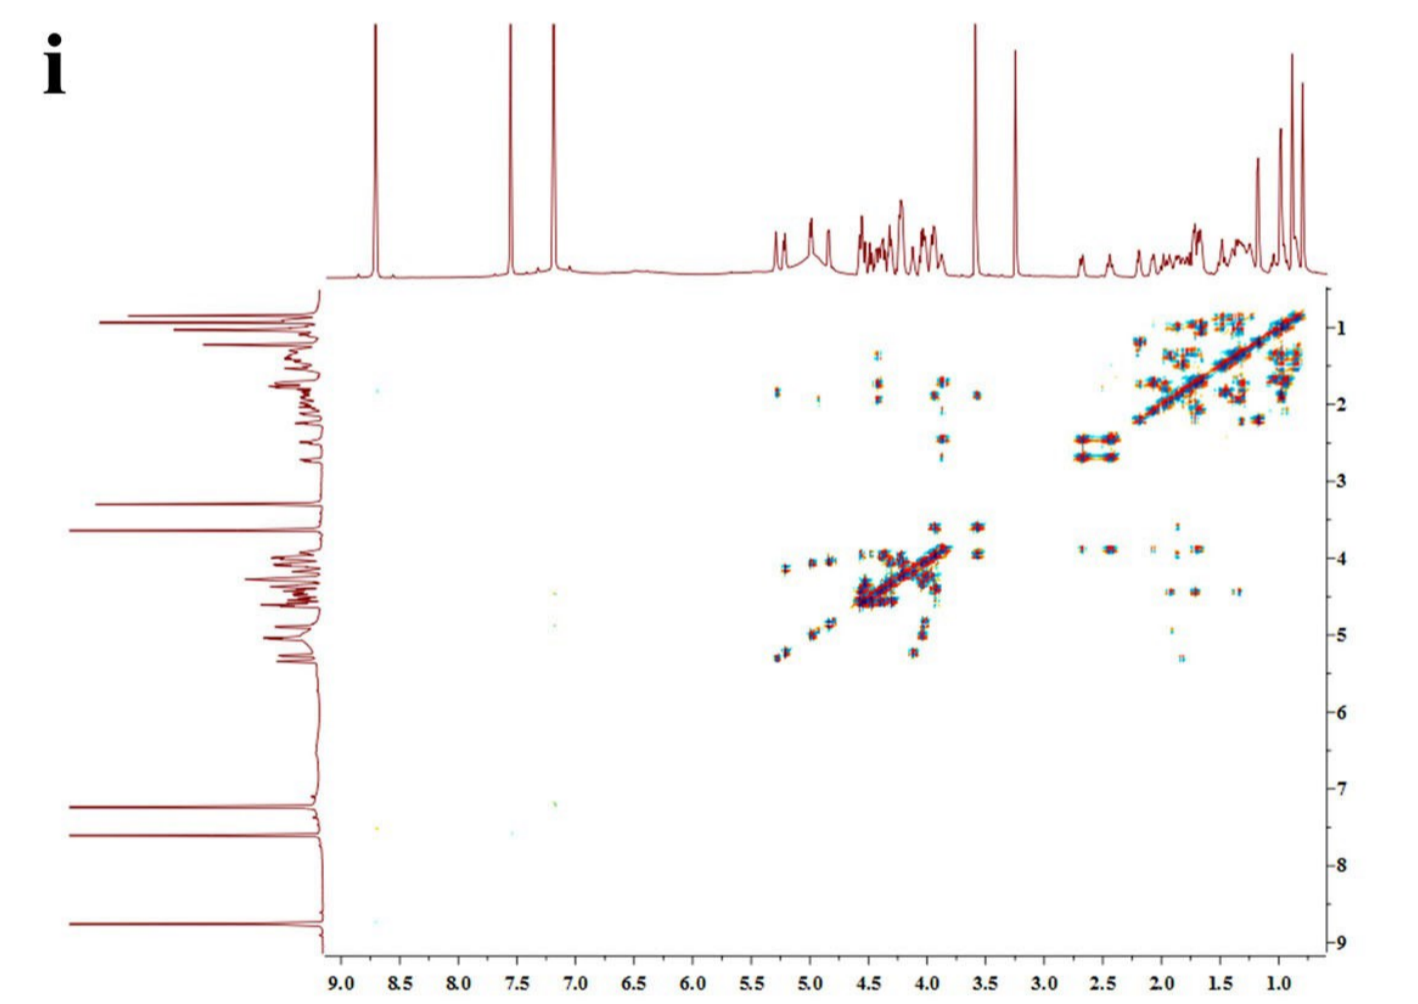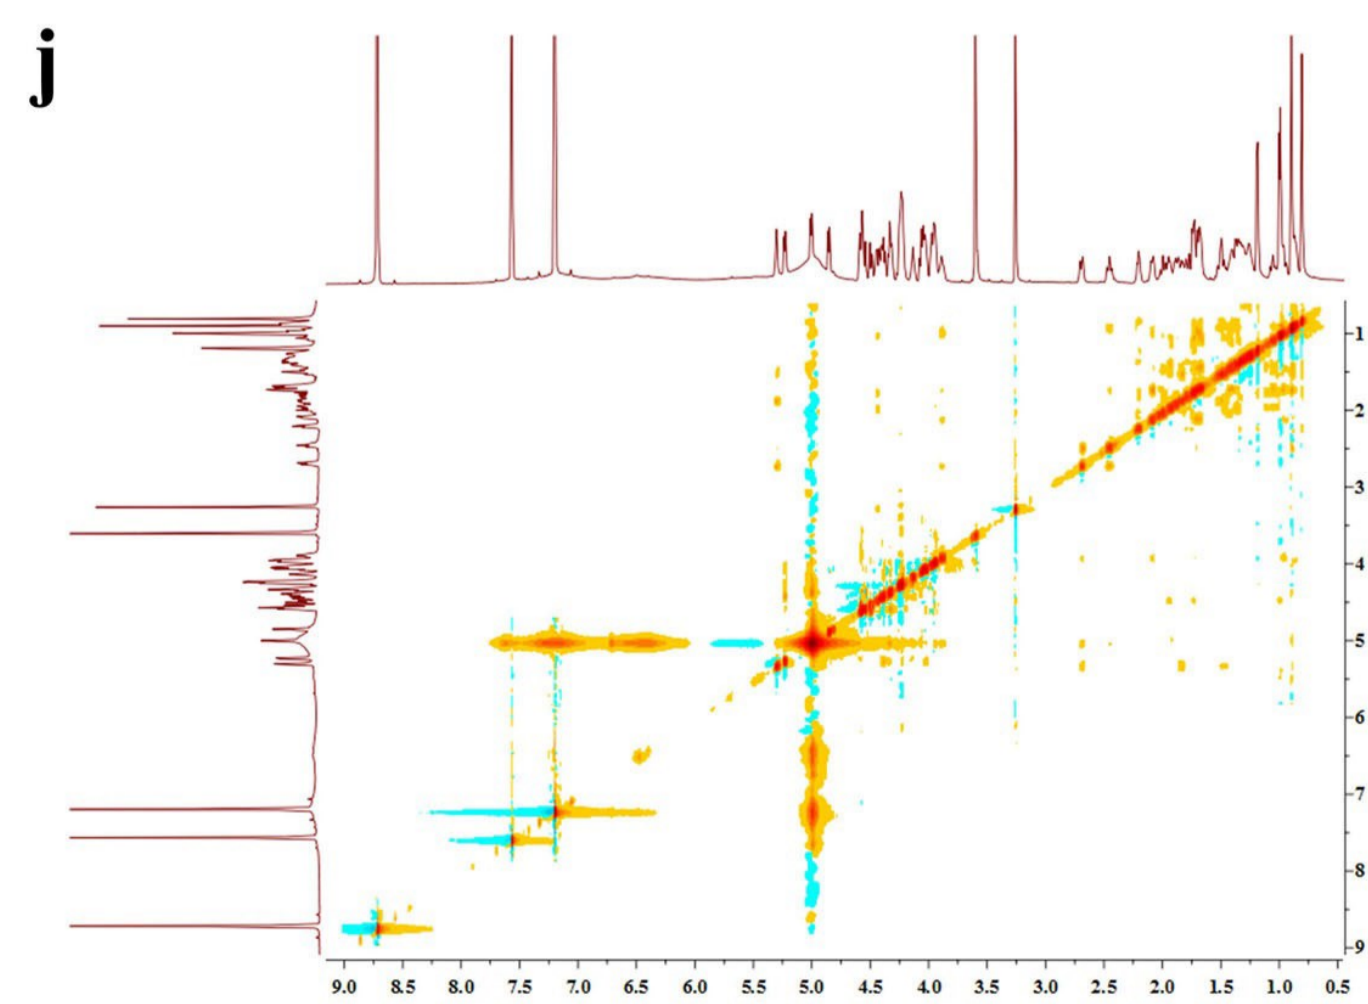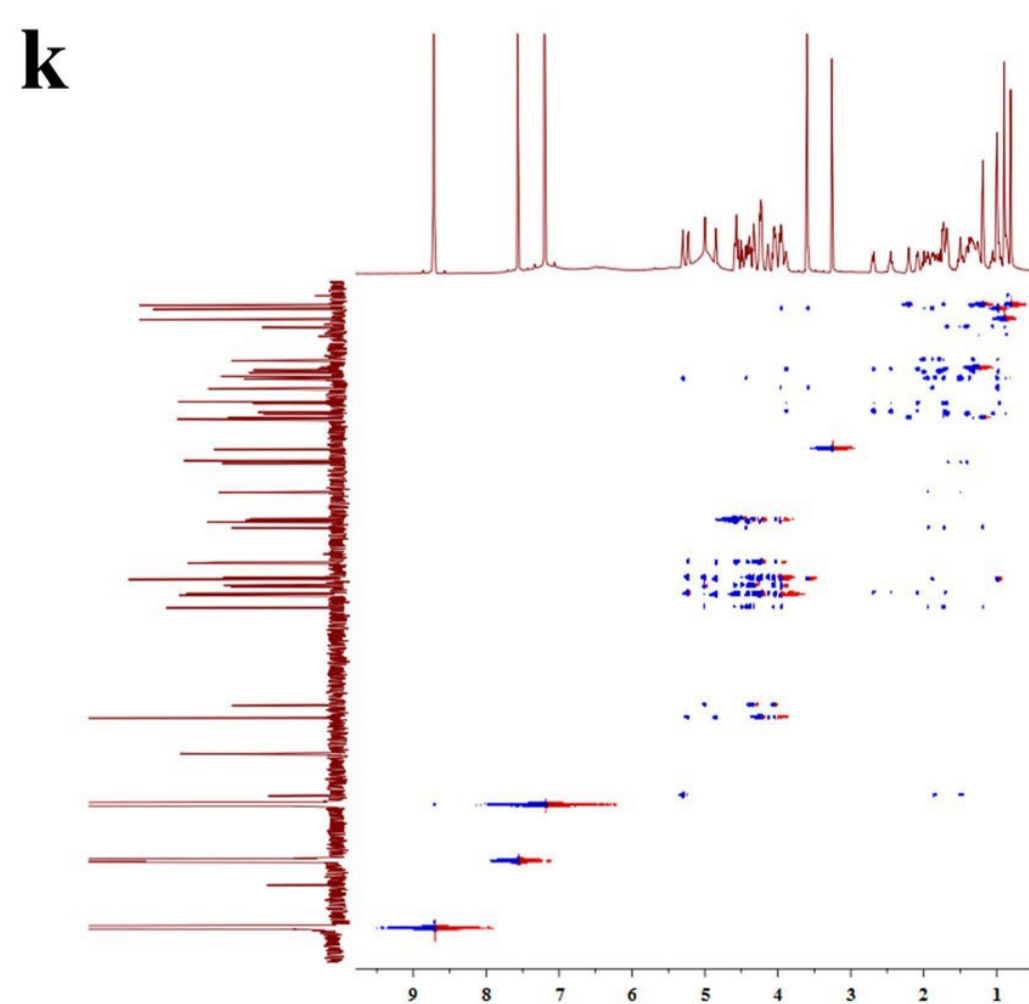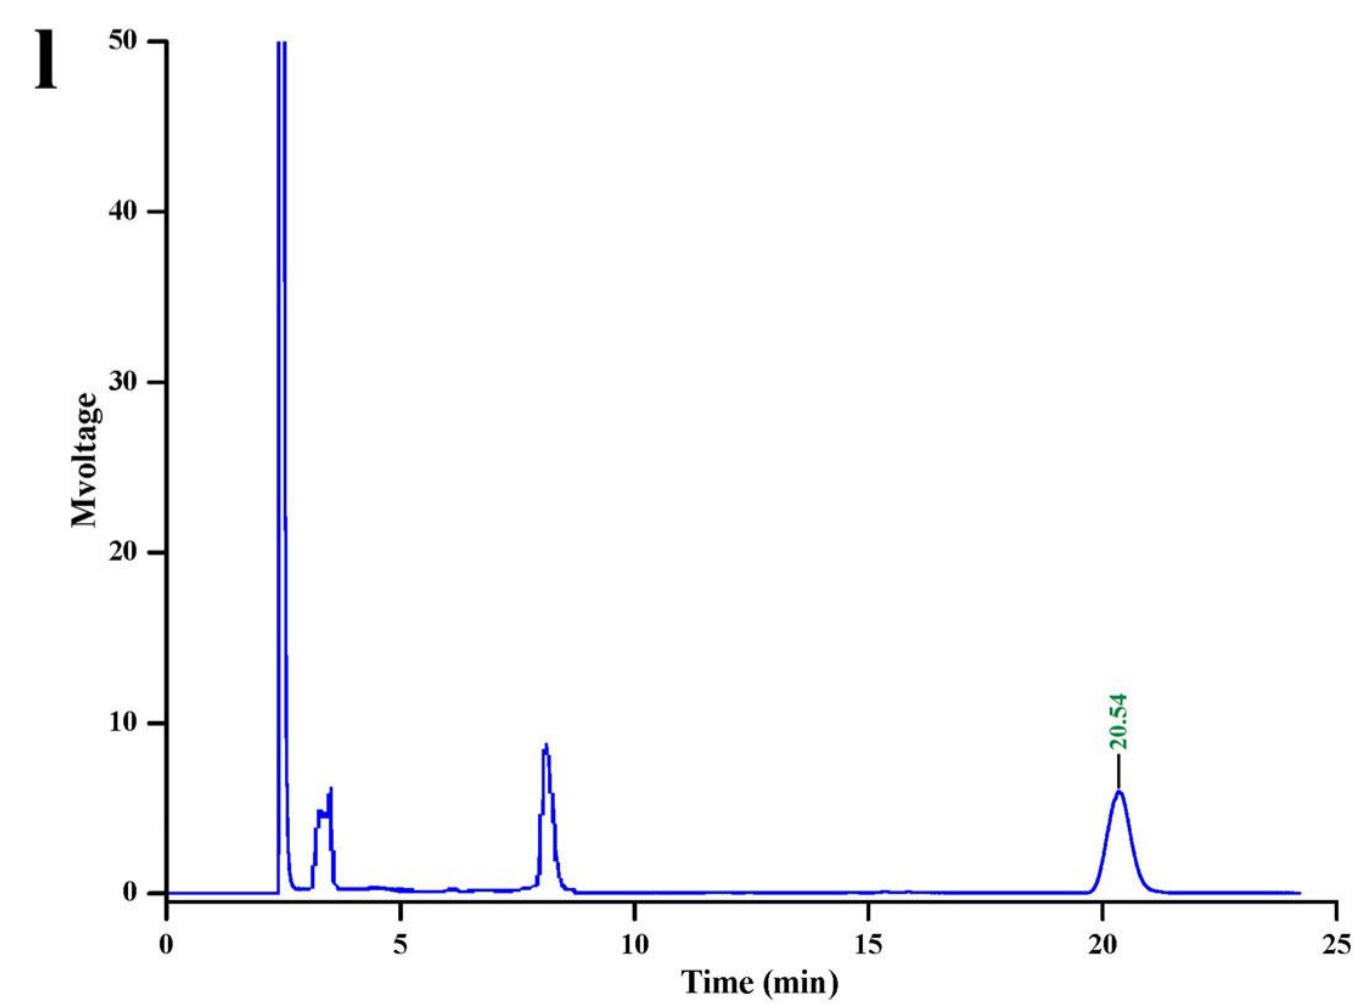

Supplement: d1fo01301g6.pdf [file d1fo01301g6.pdf]

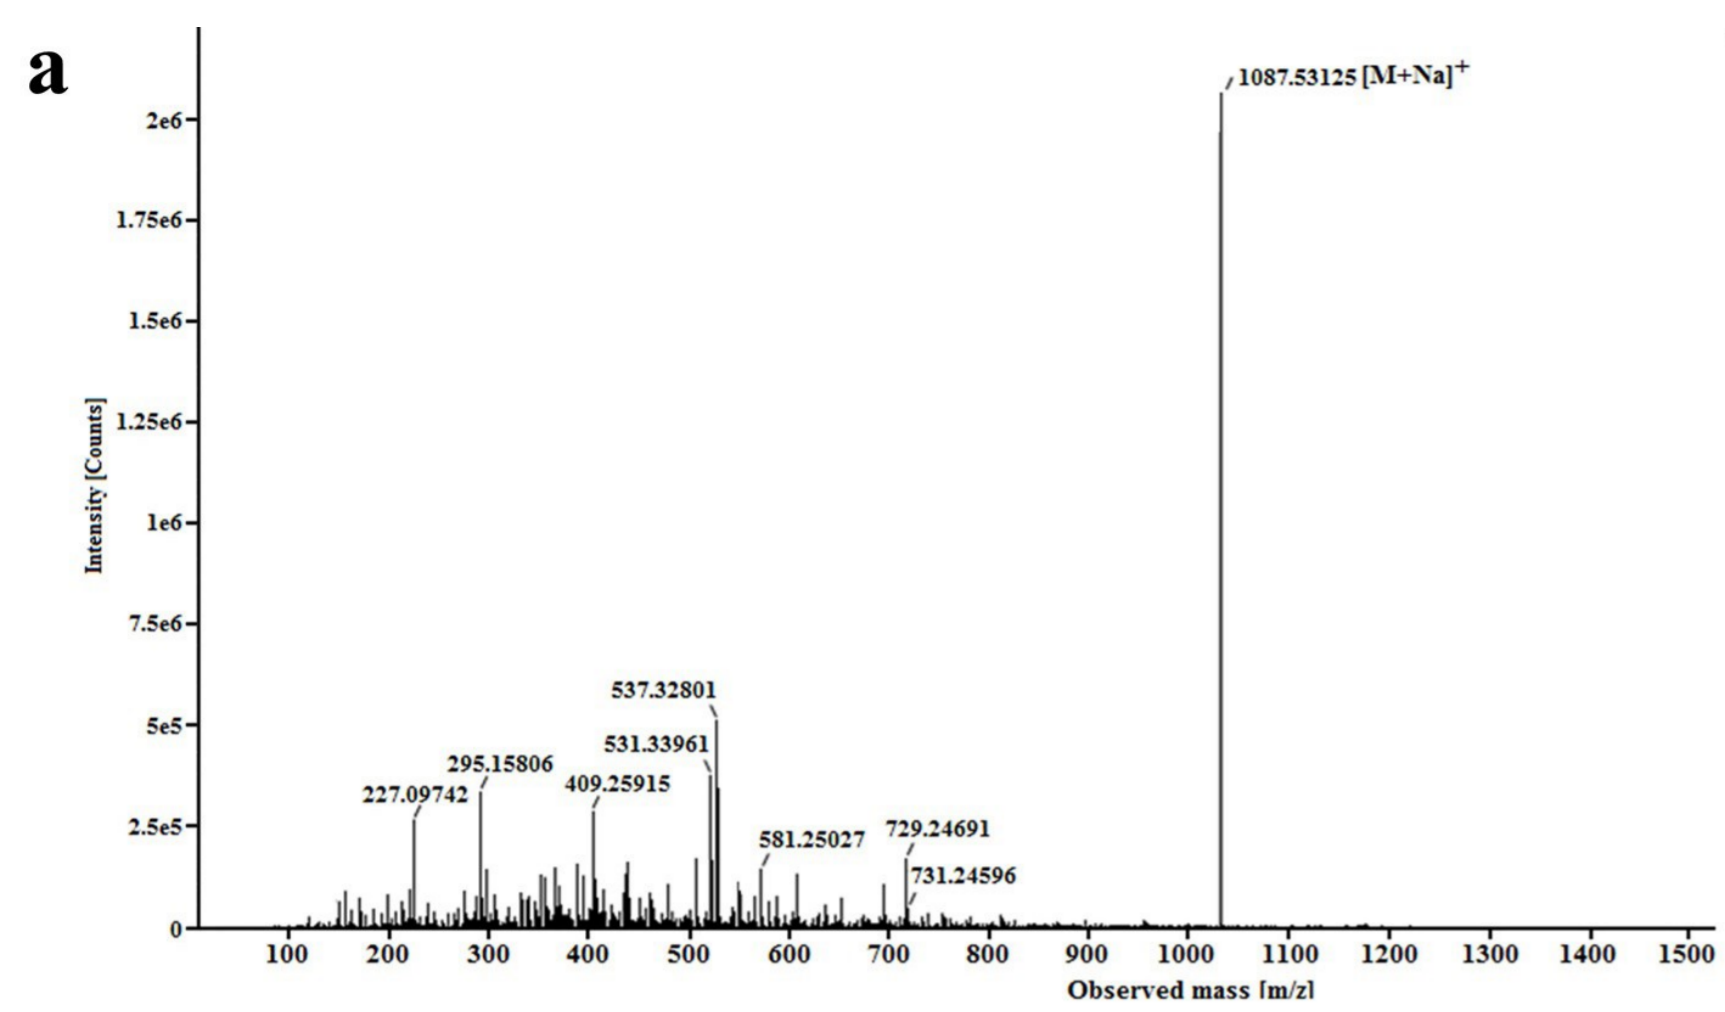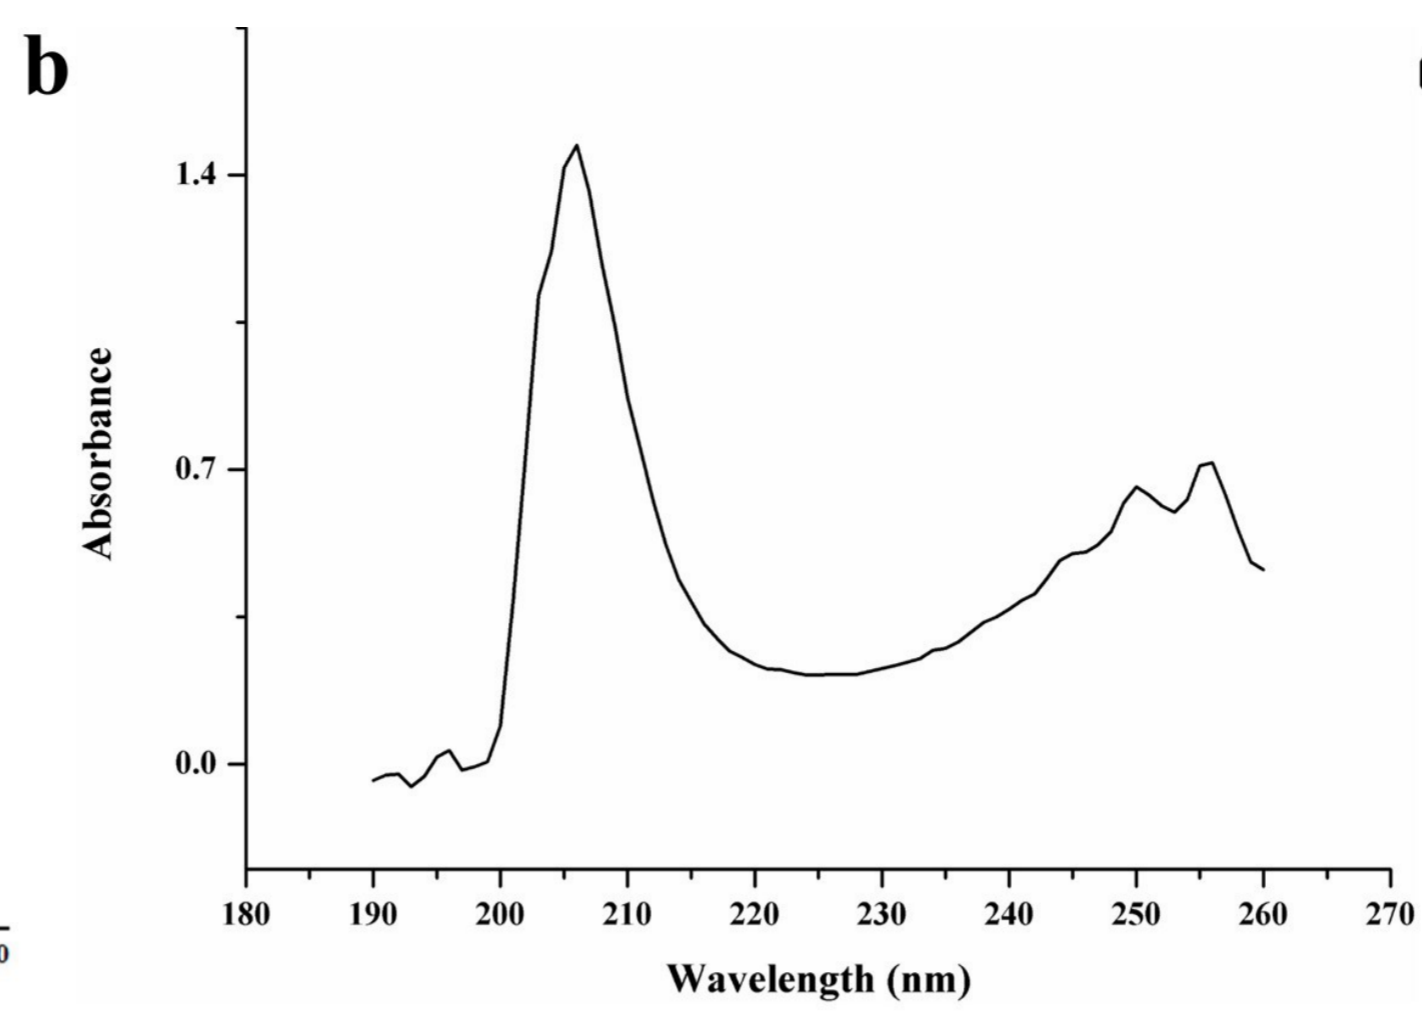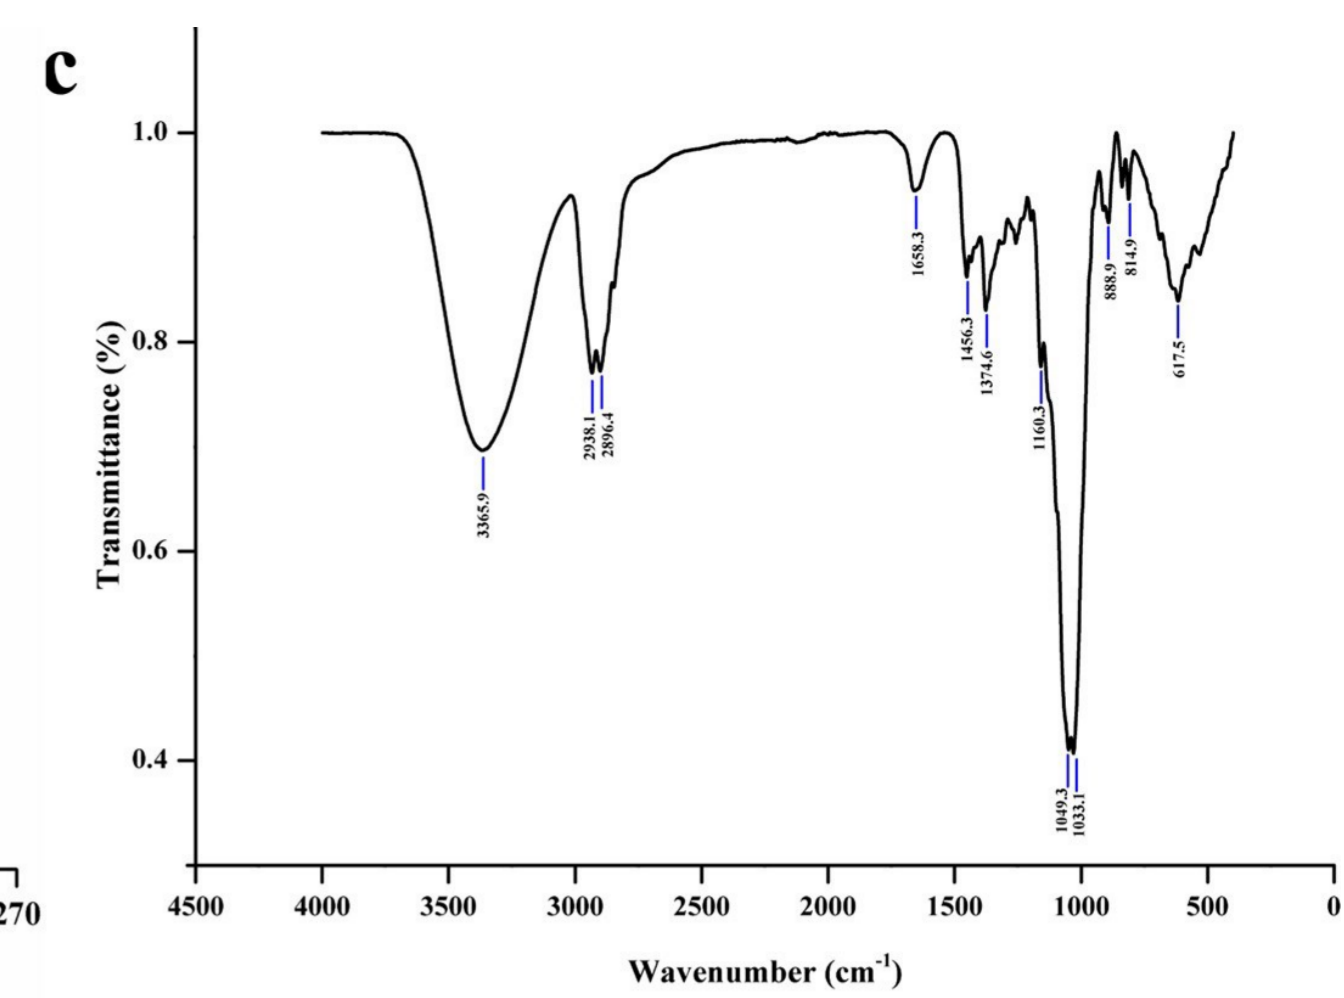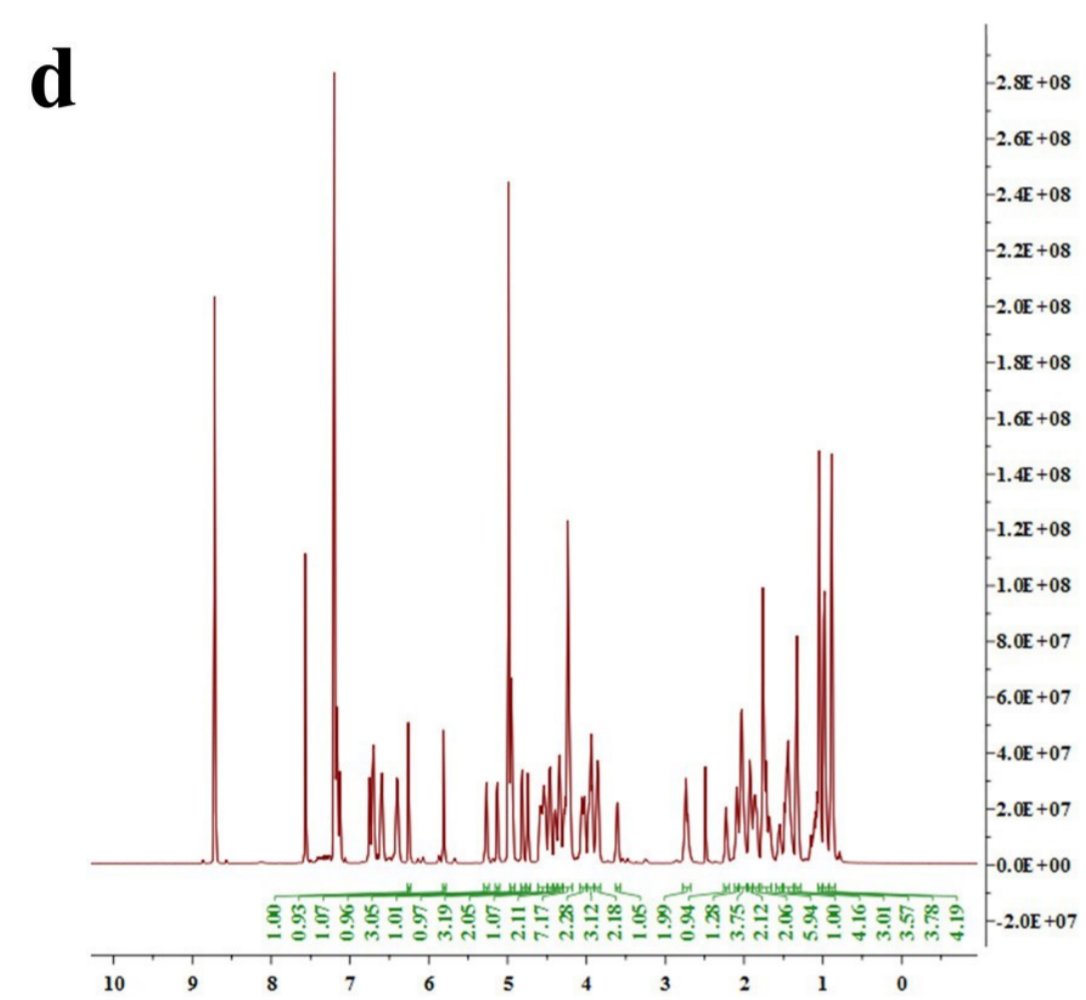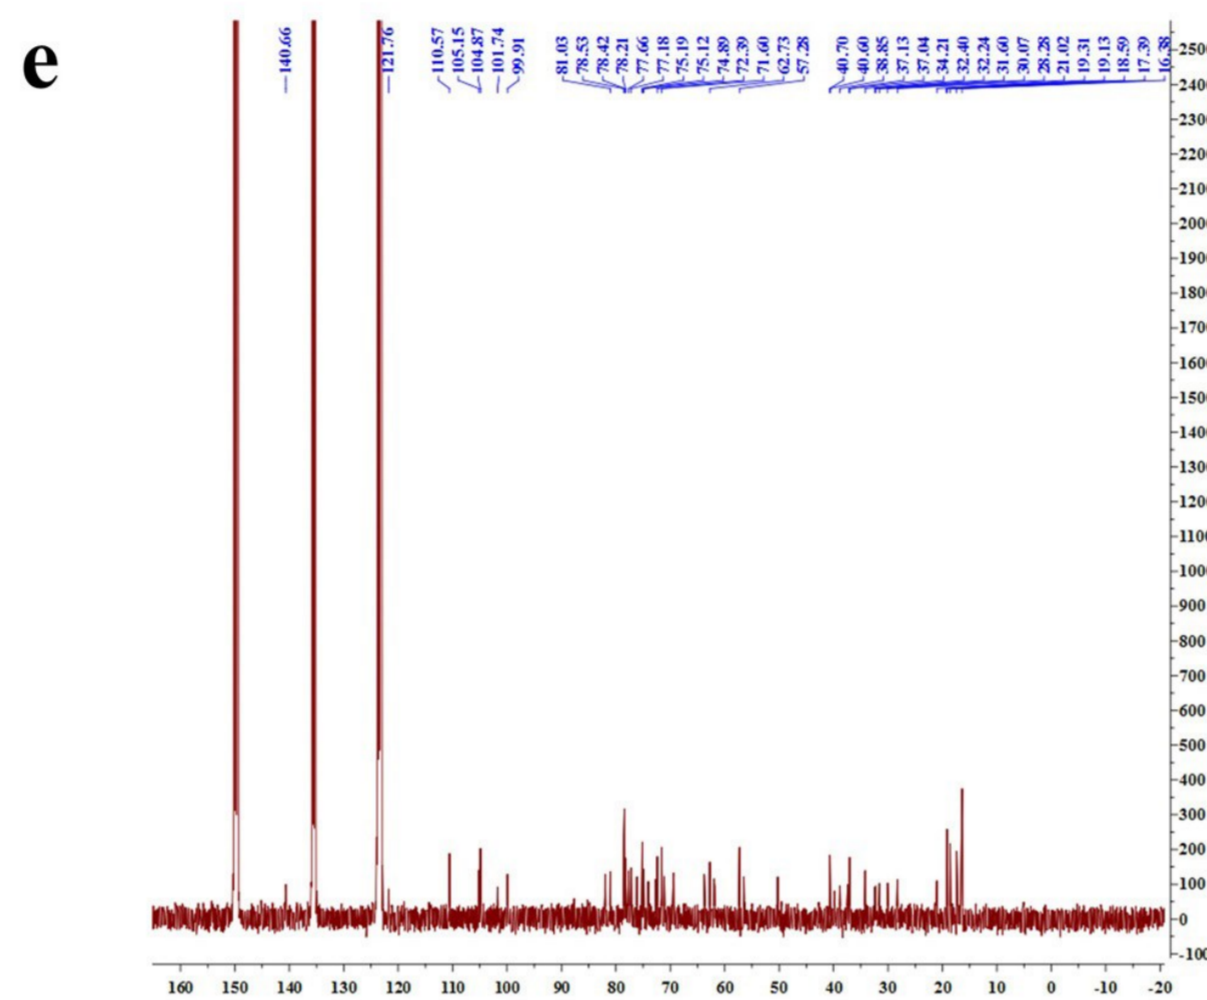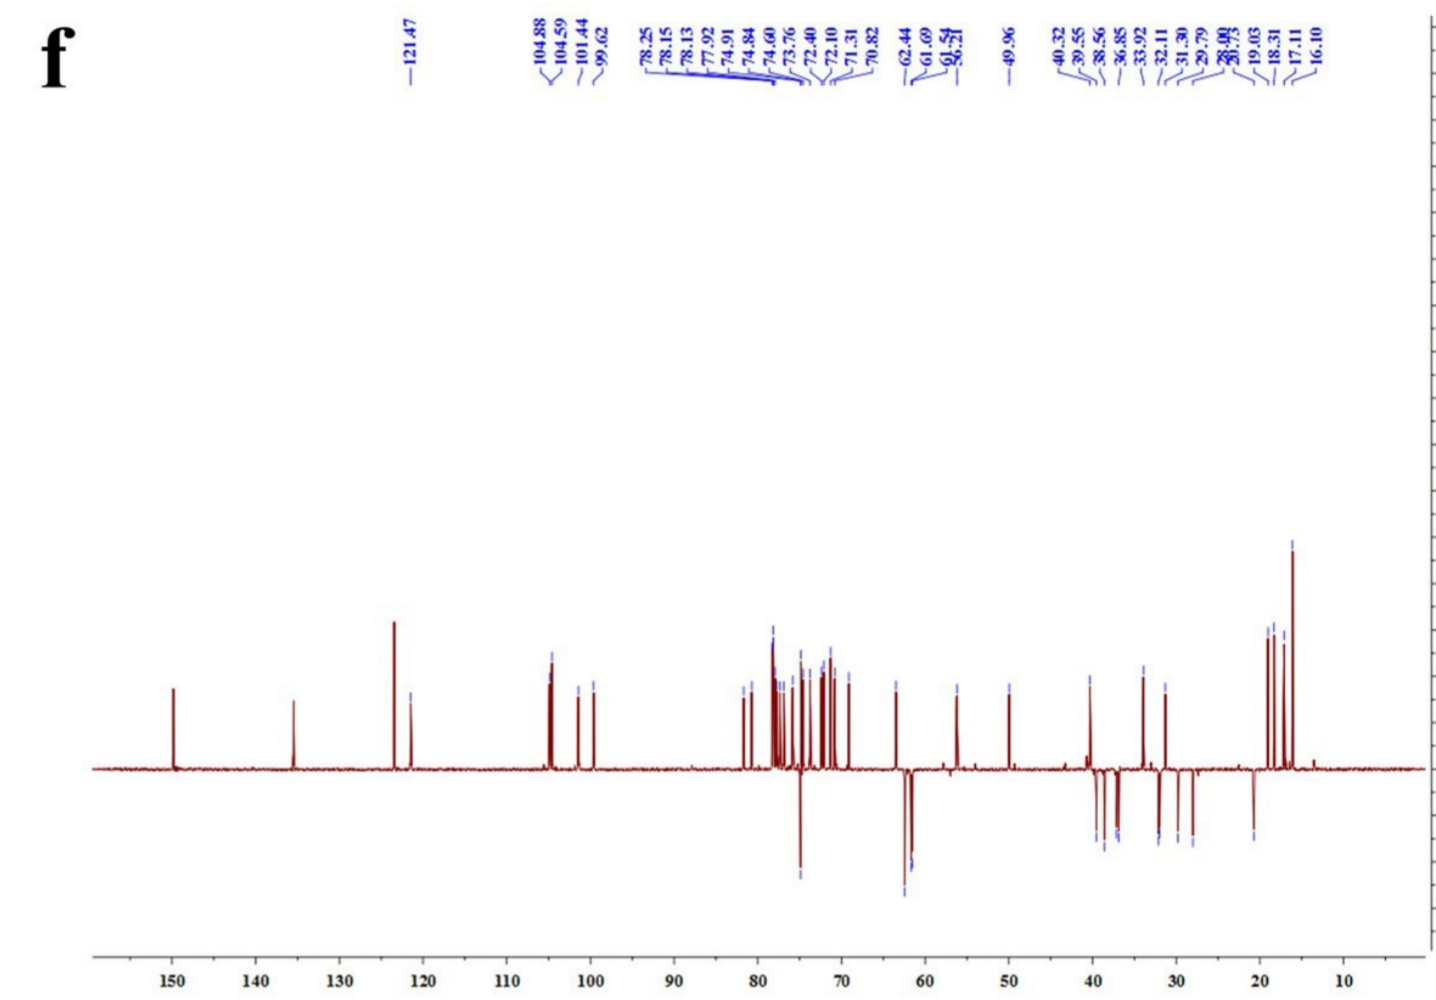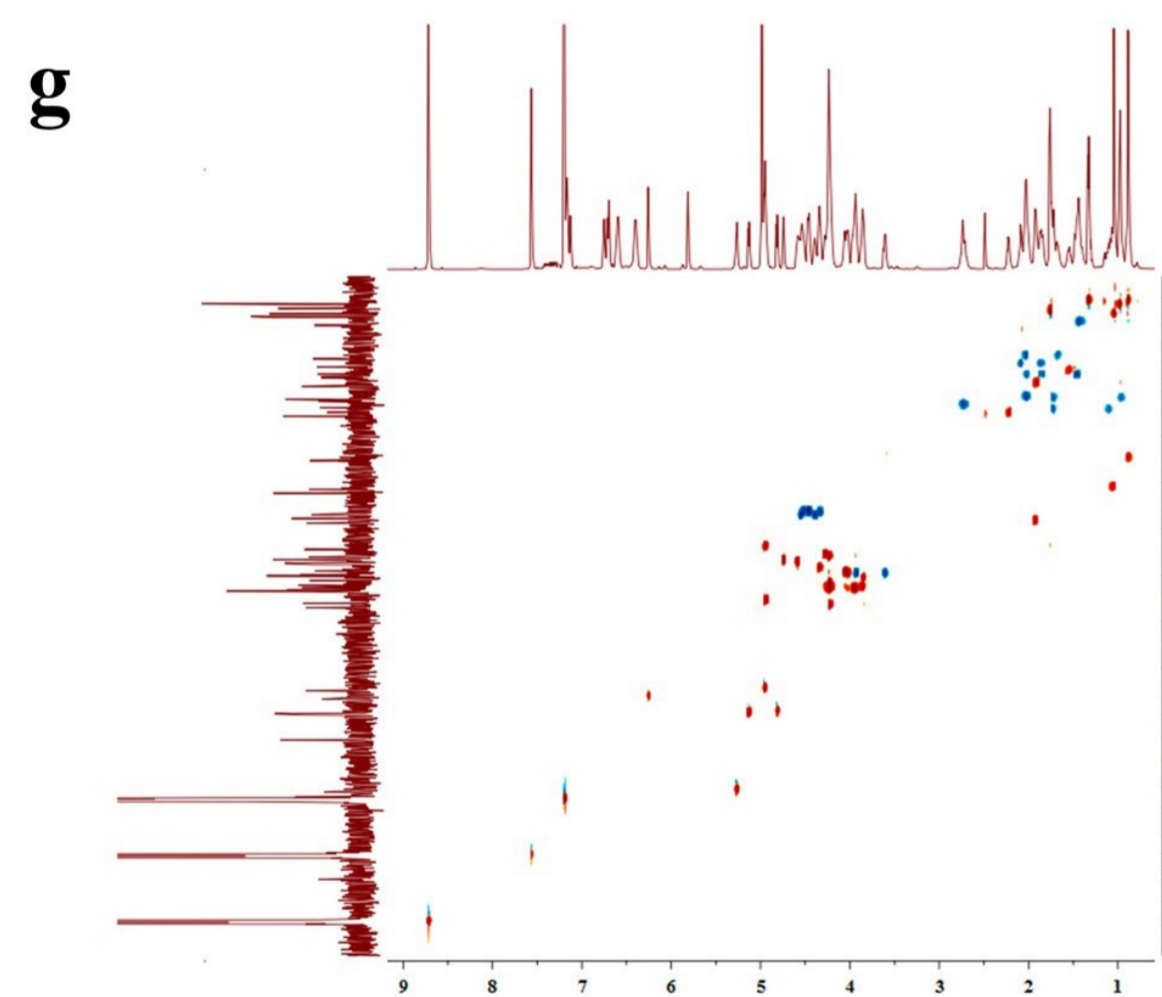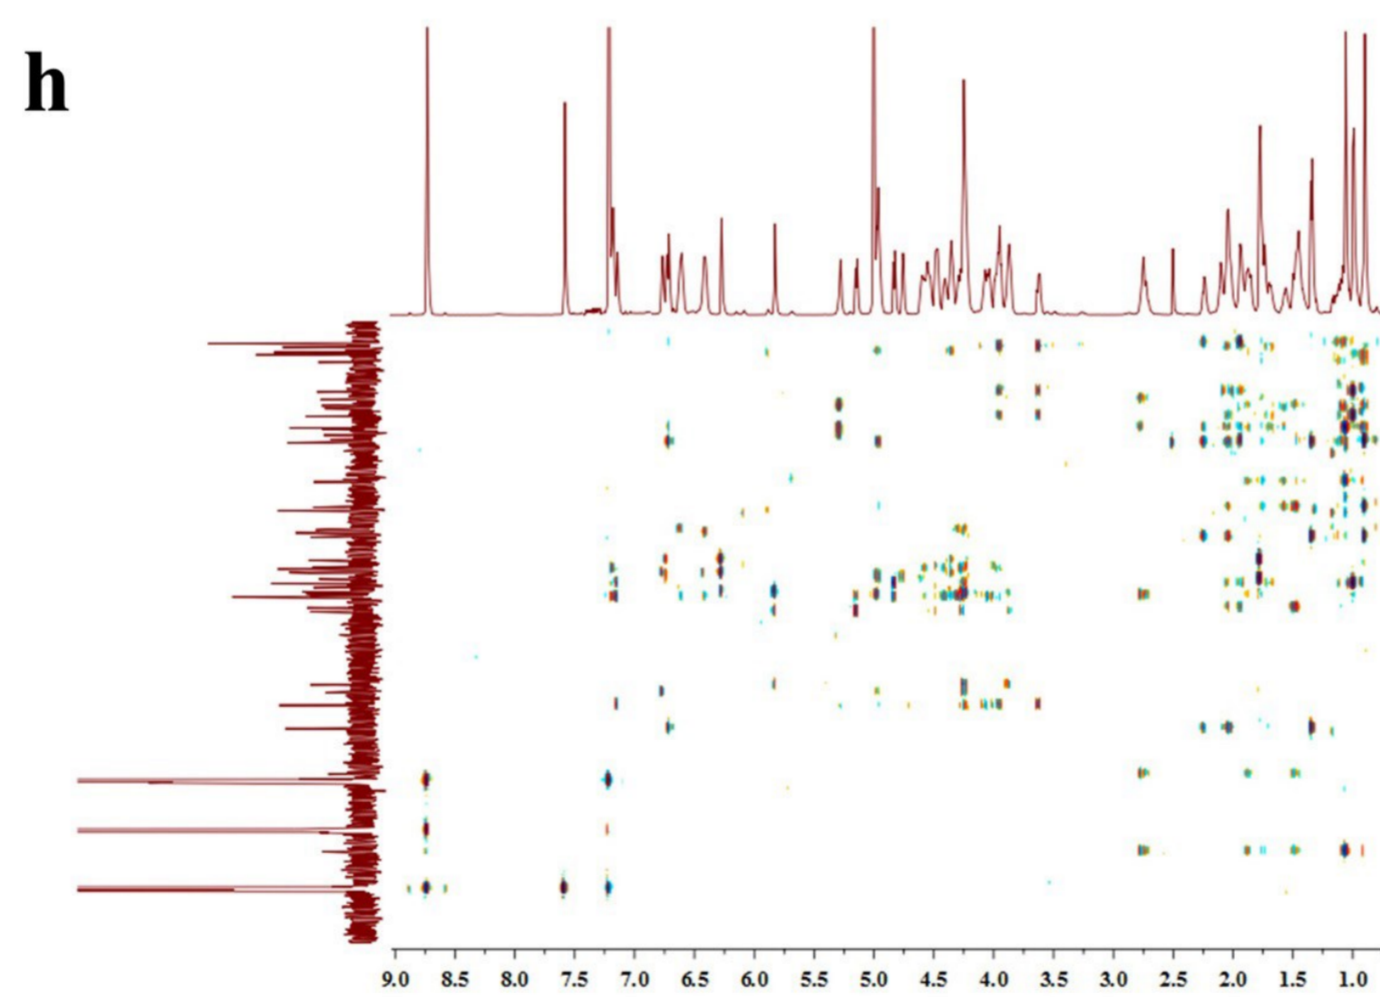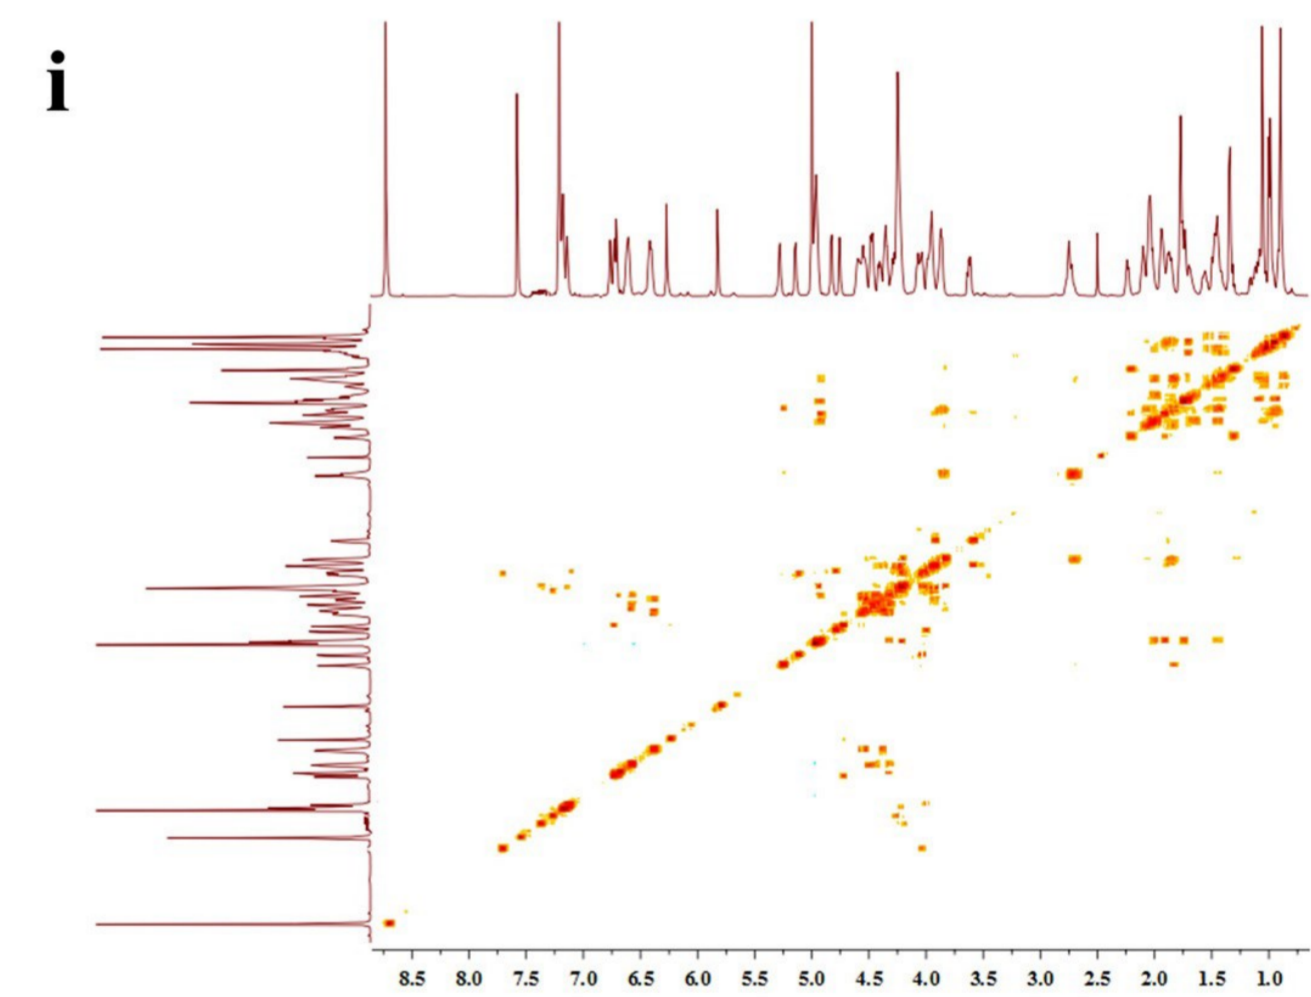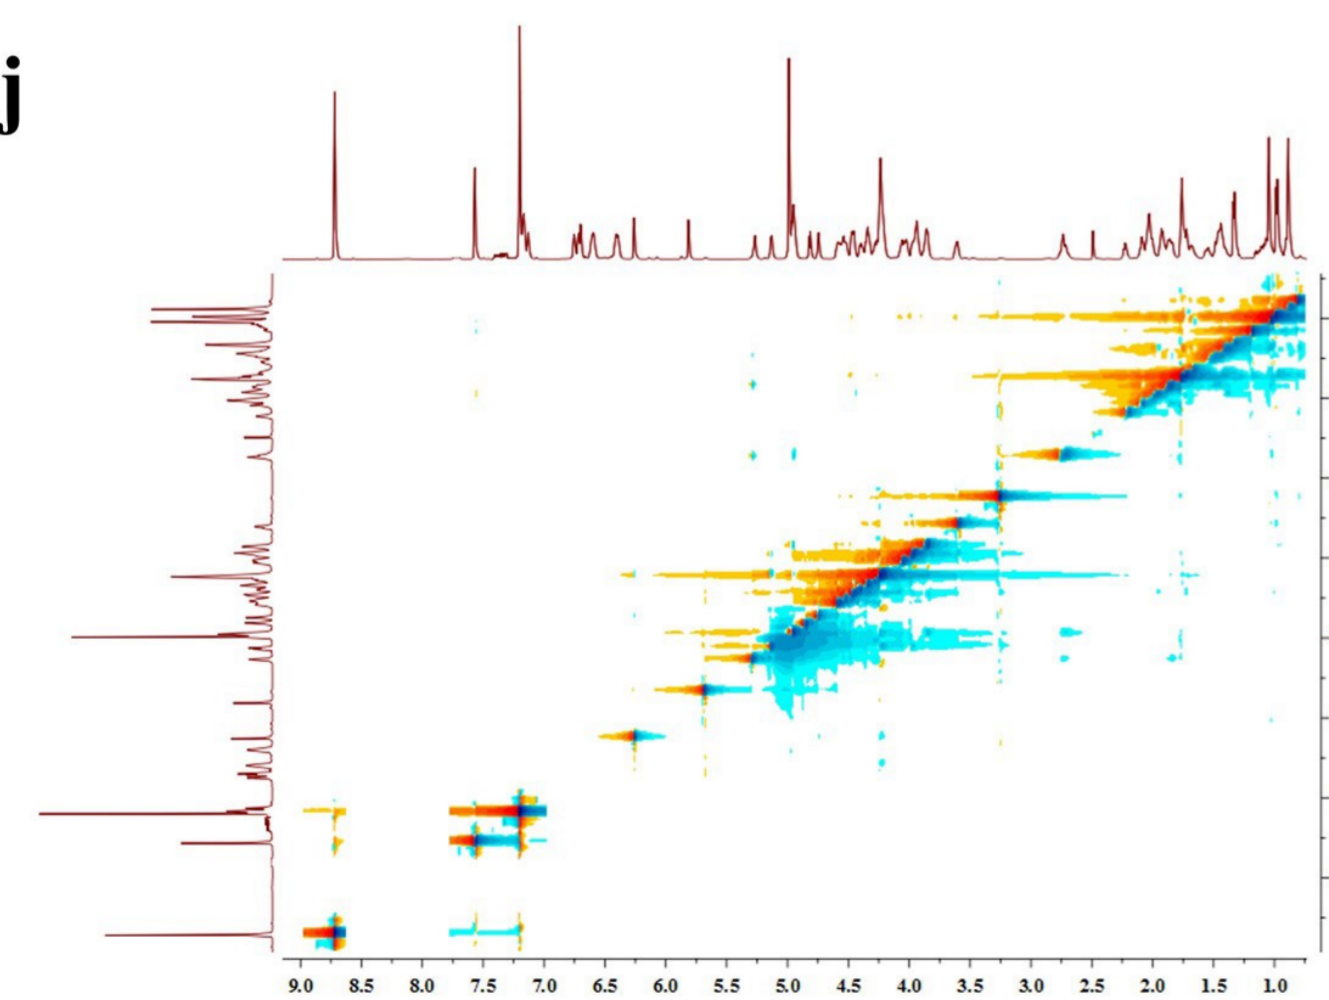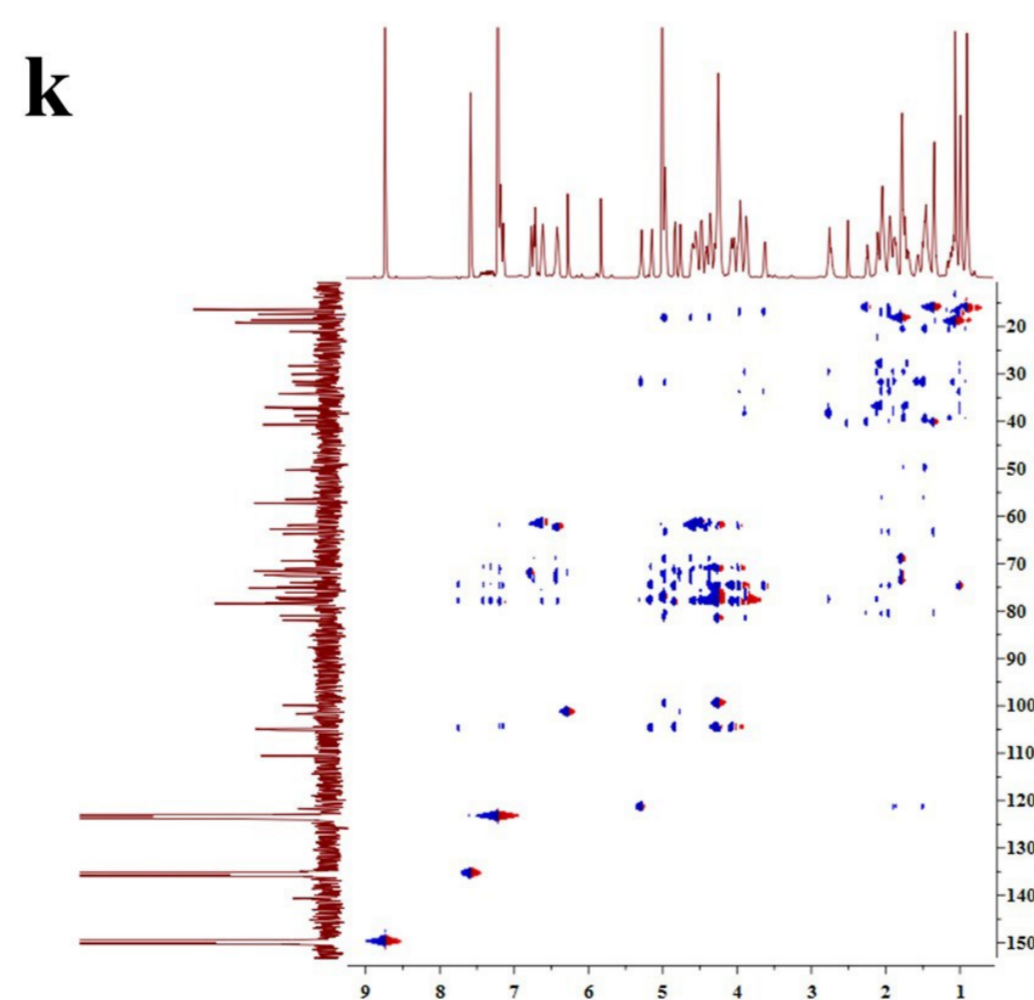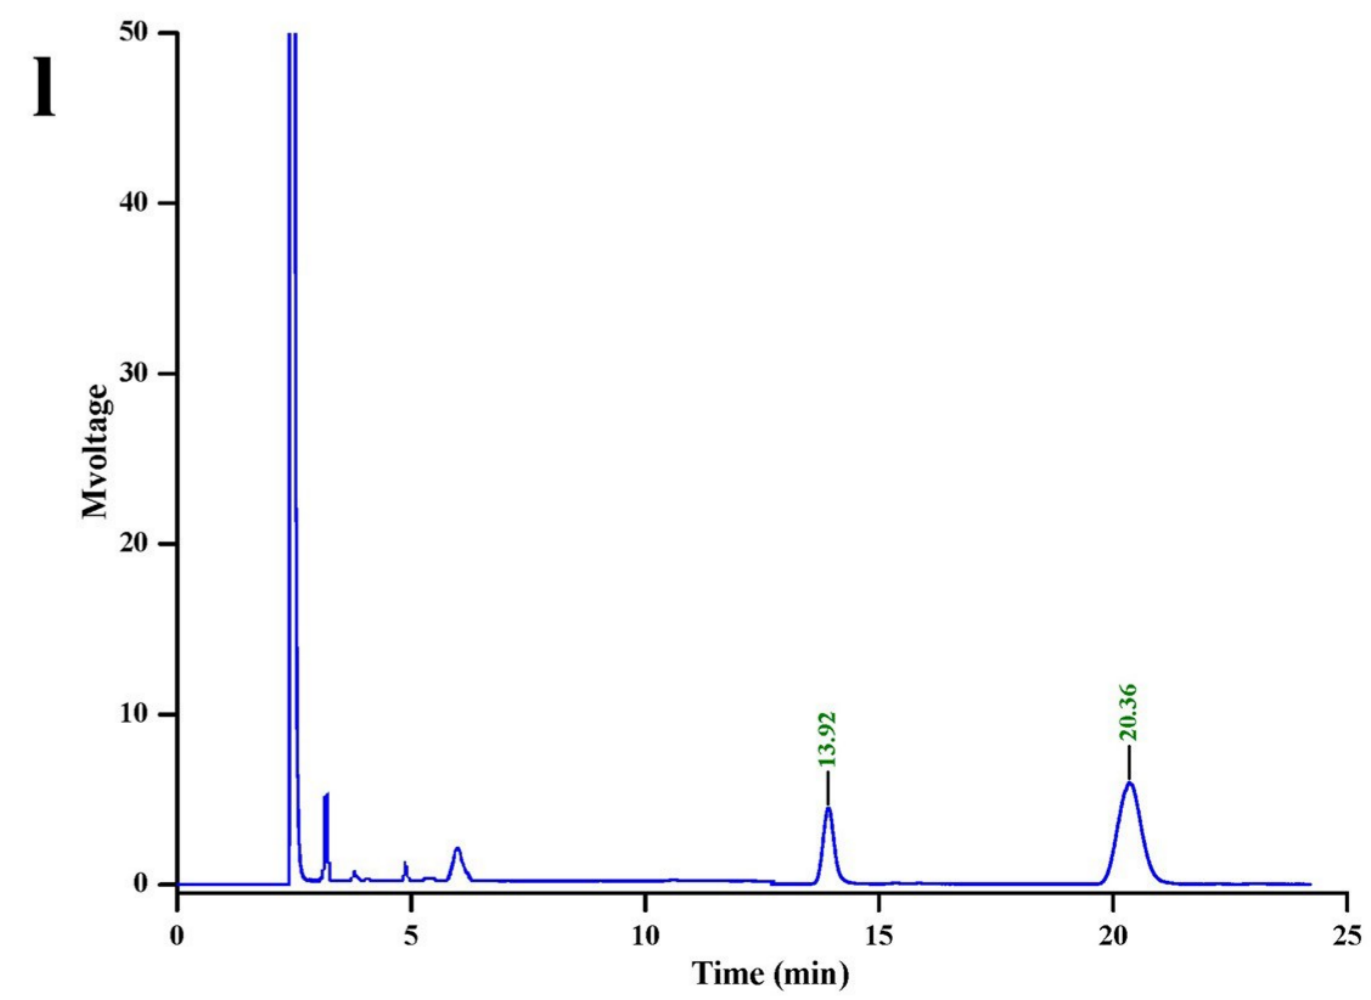

Supplement: d1fo01301g7.pdf [file d1fo01301g7.pdf]

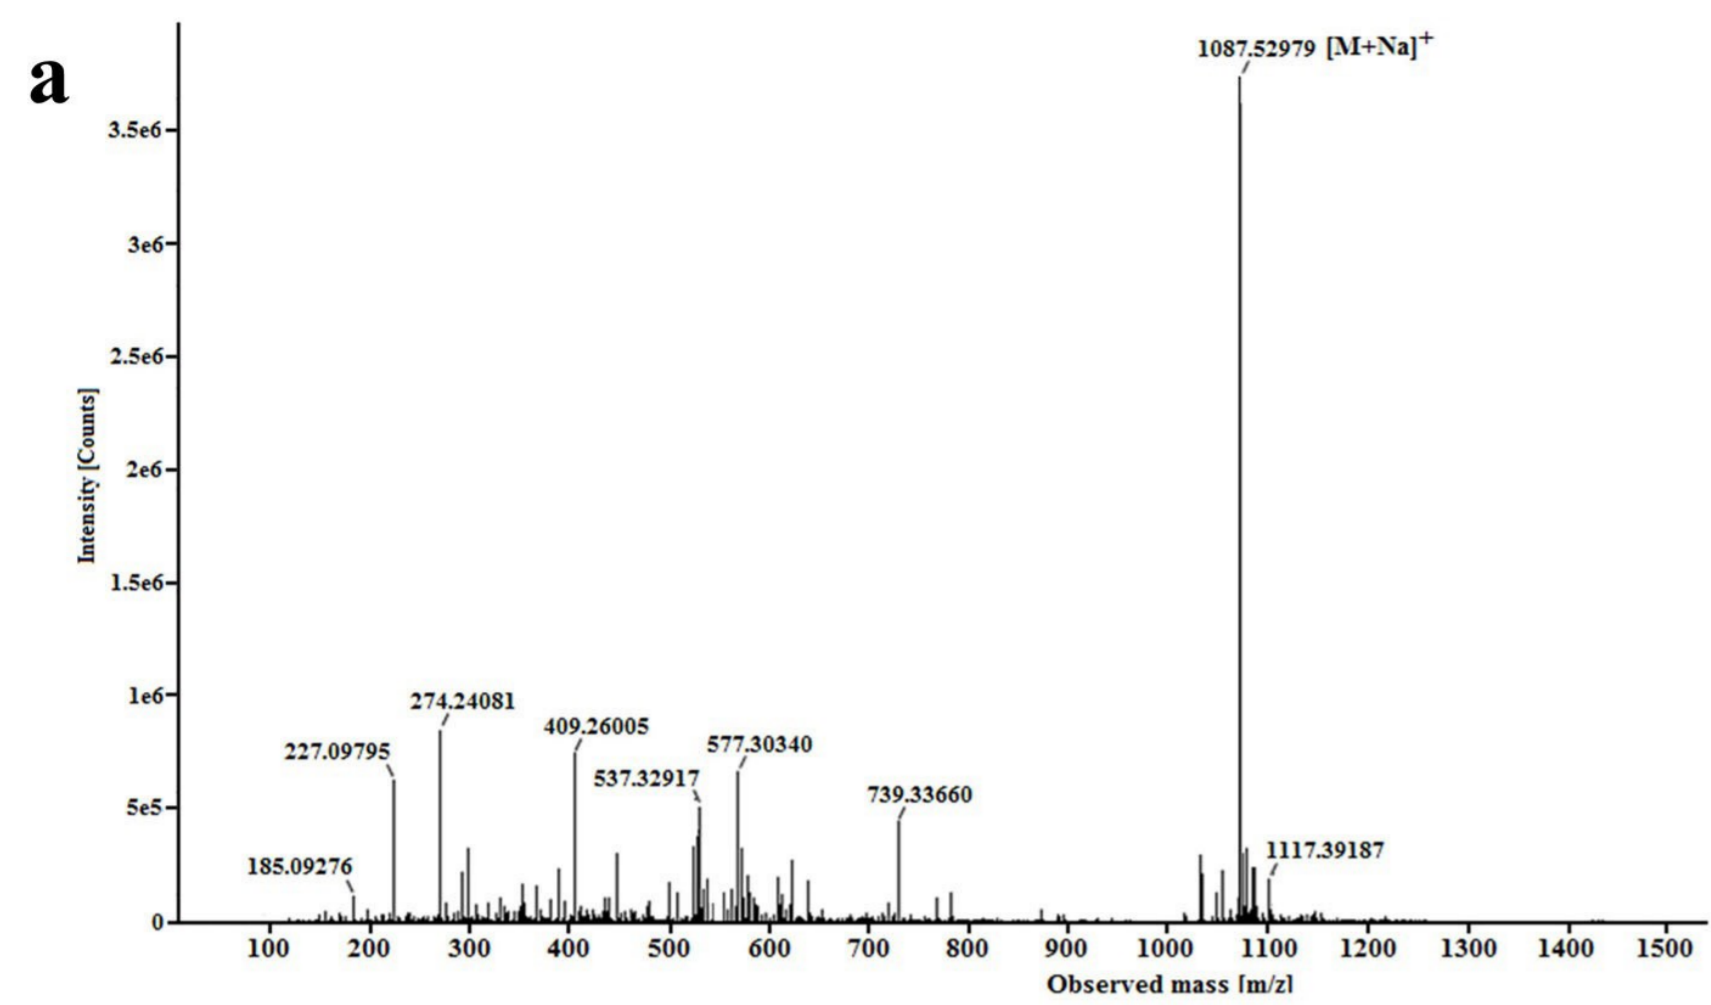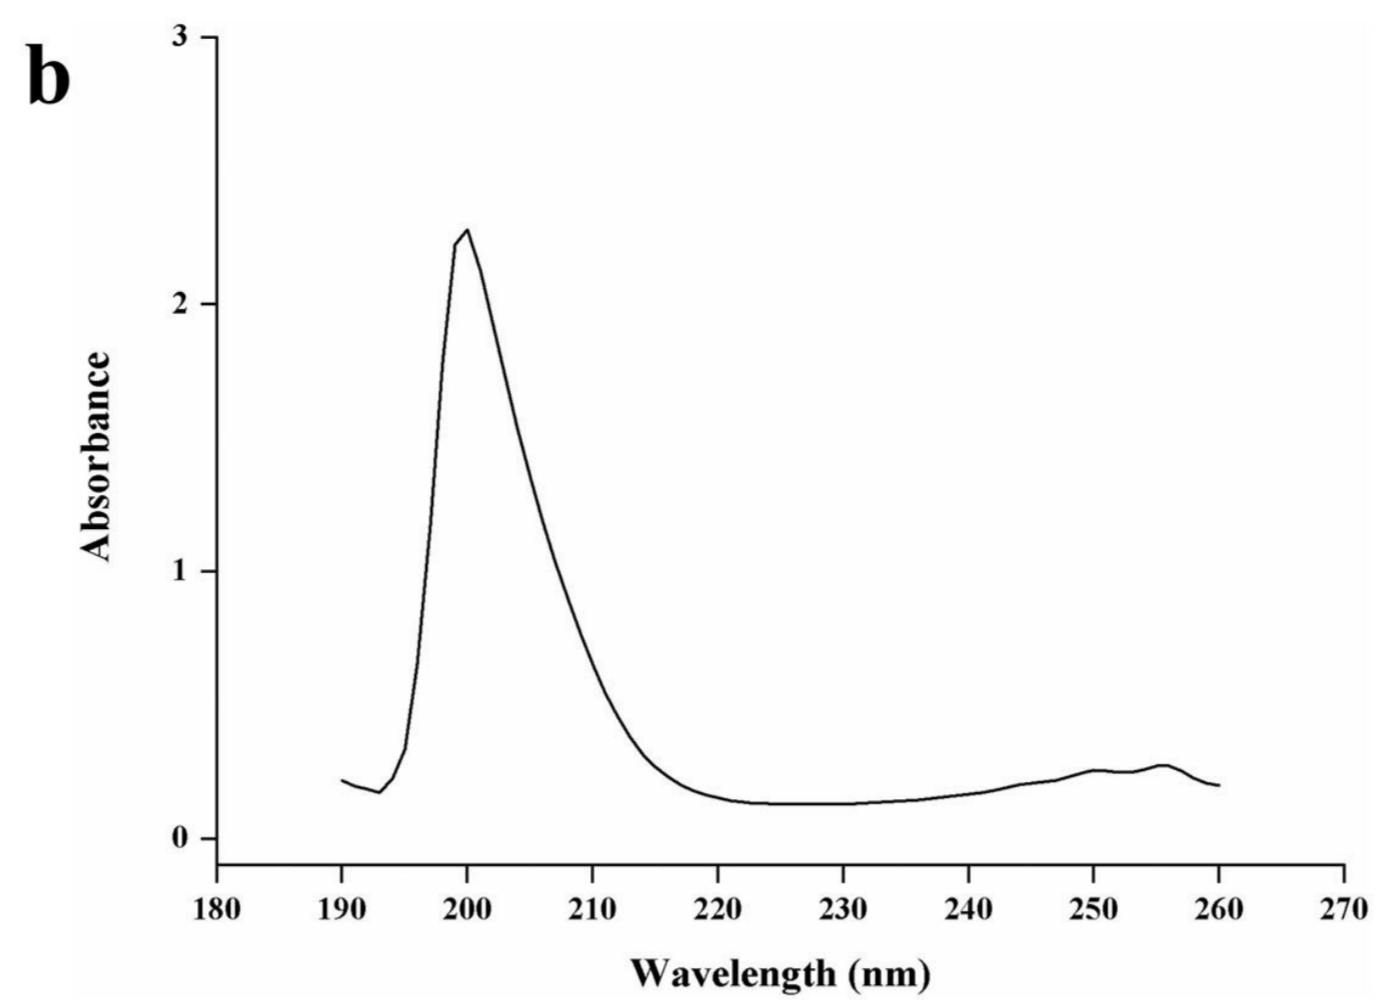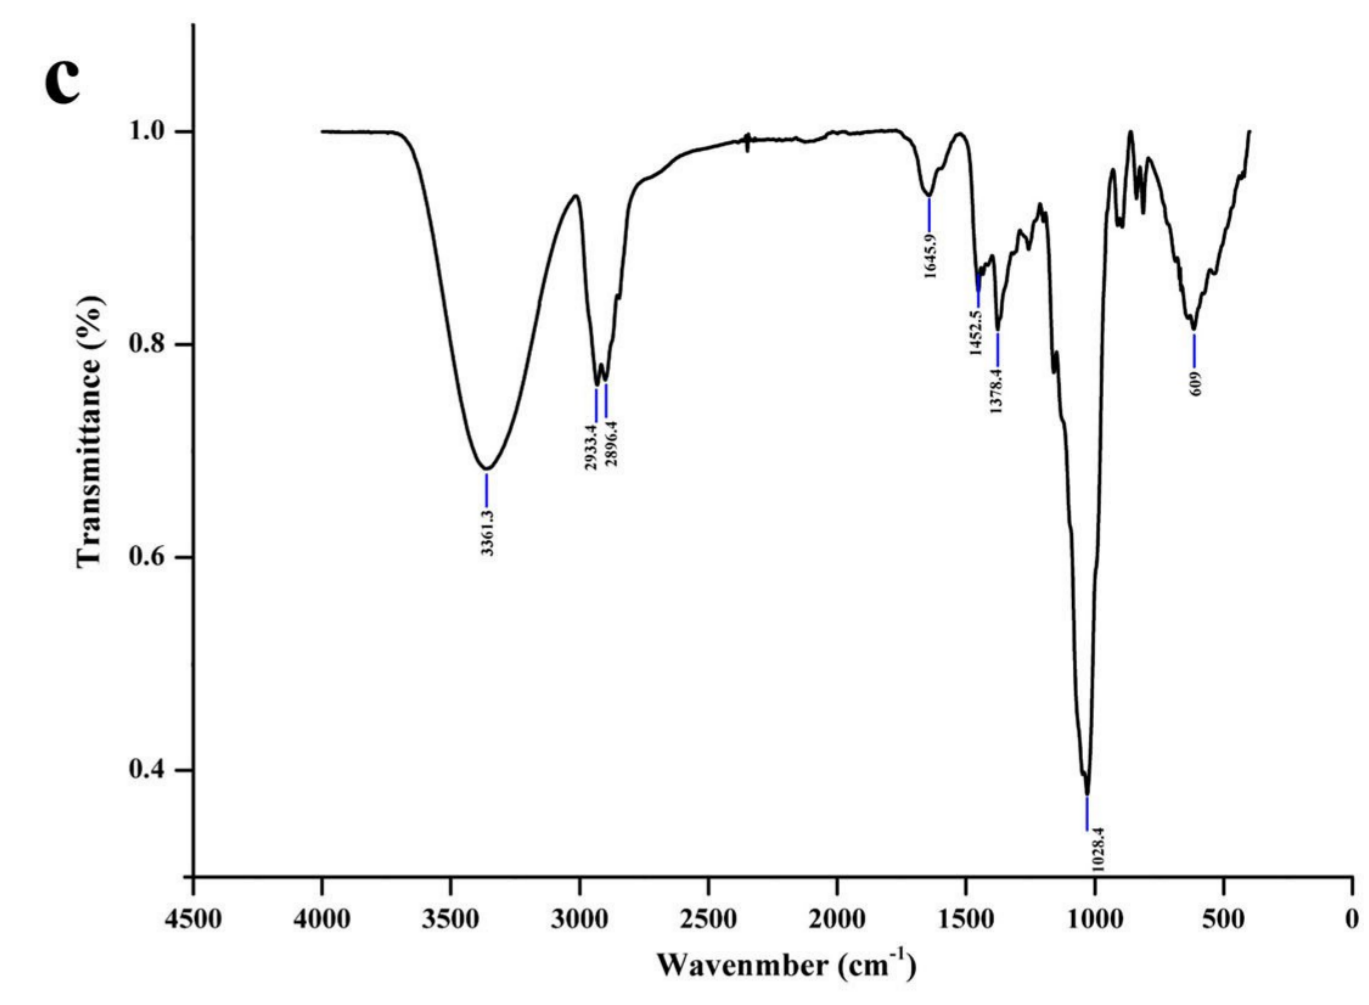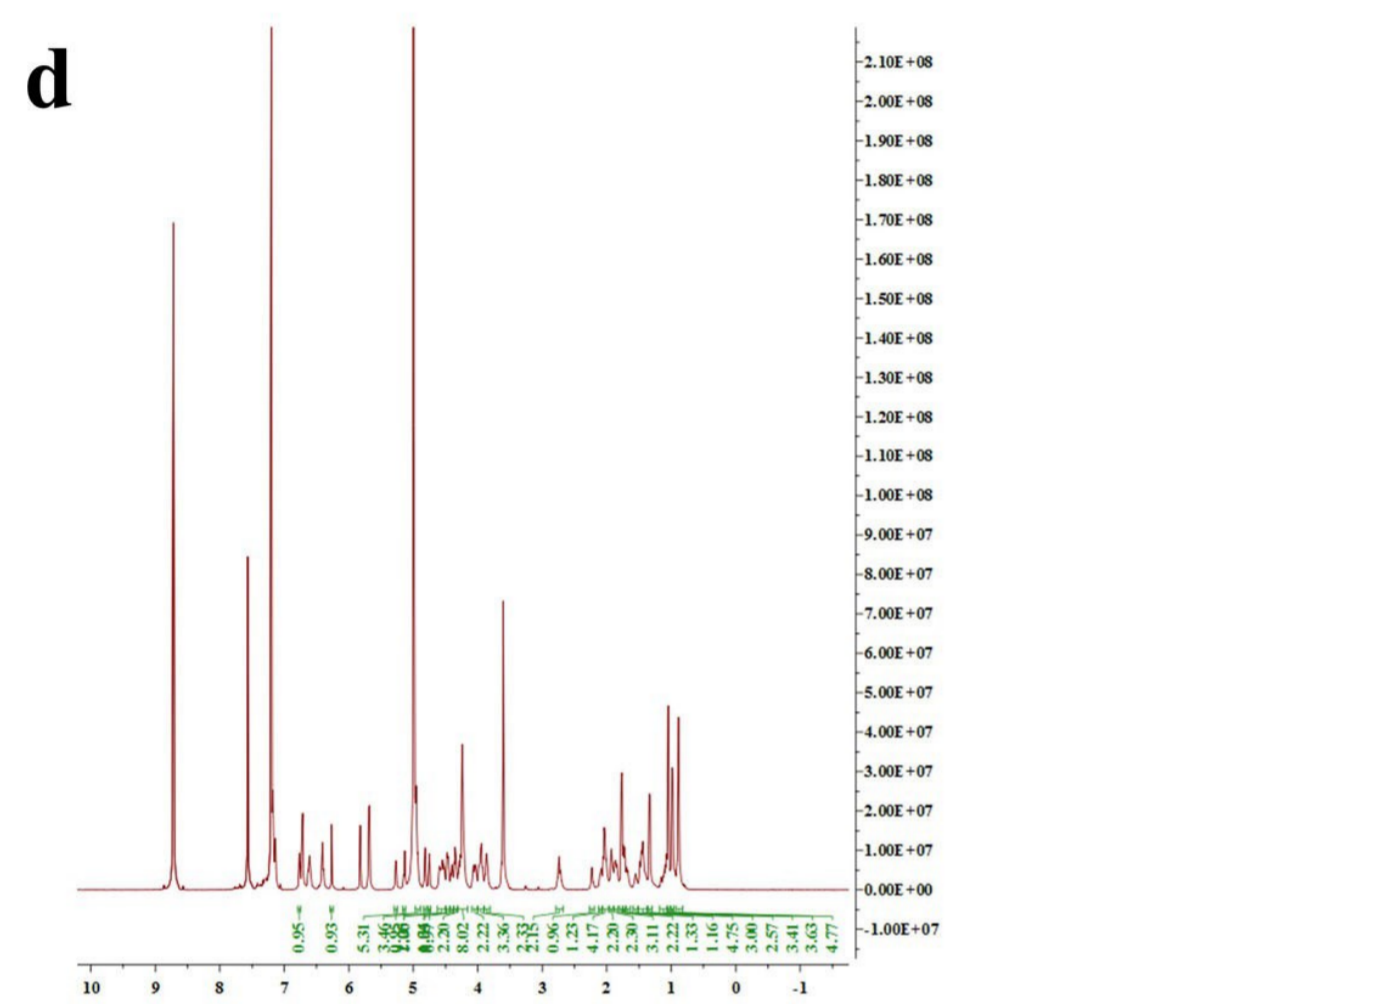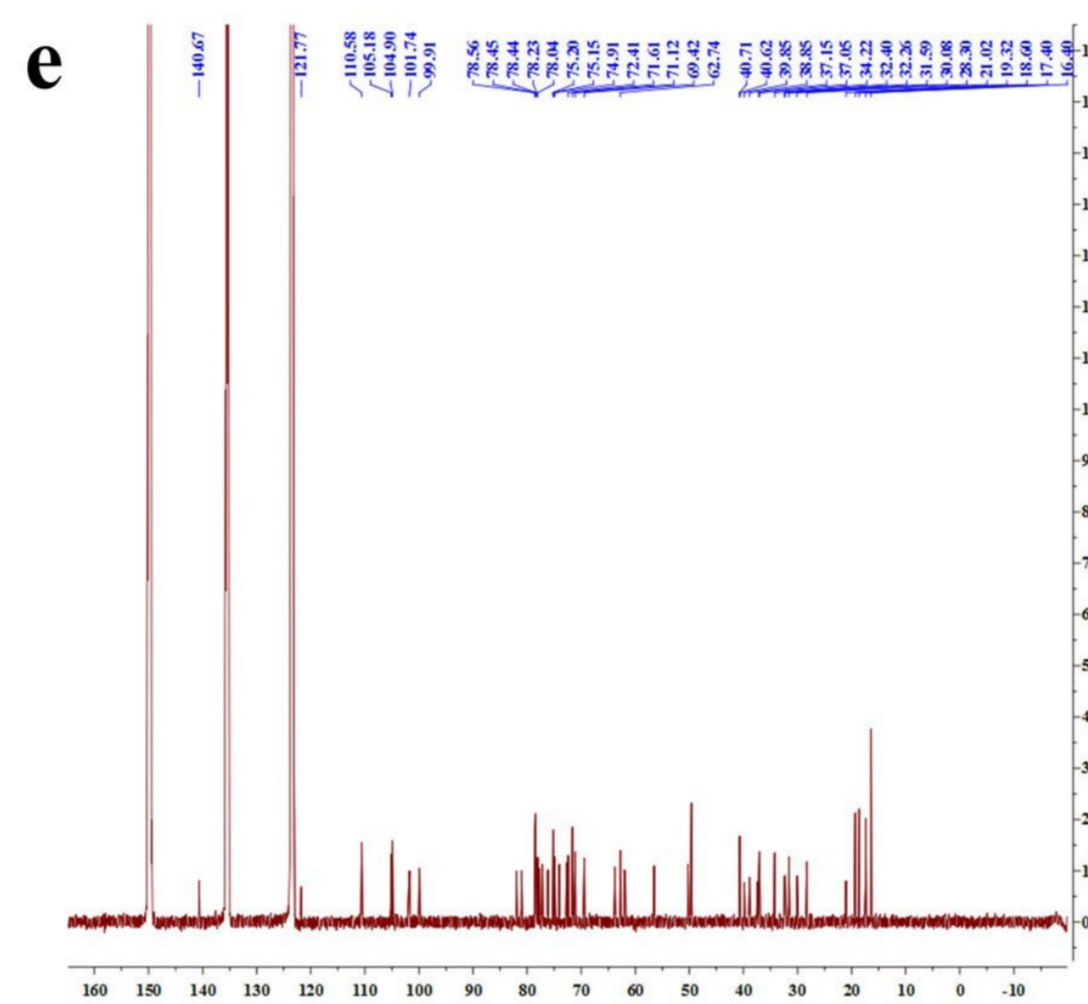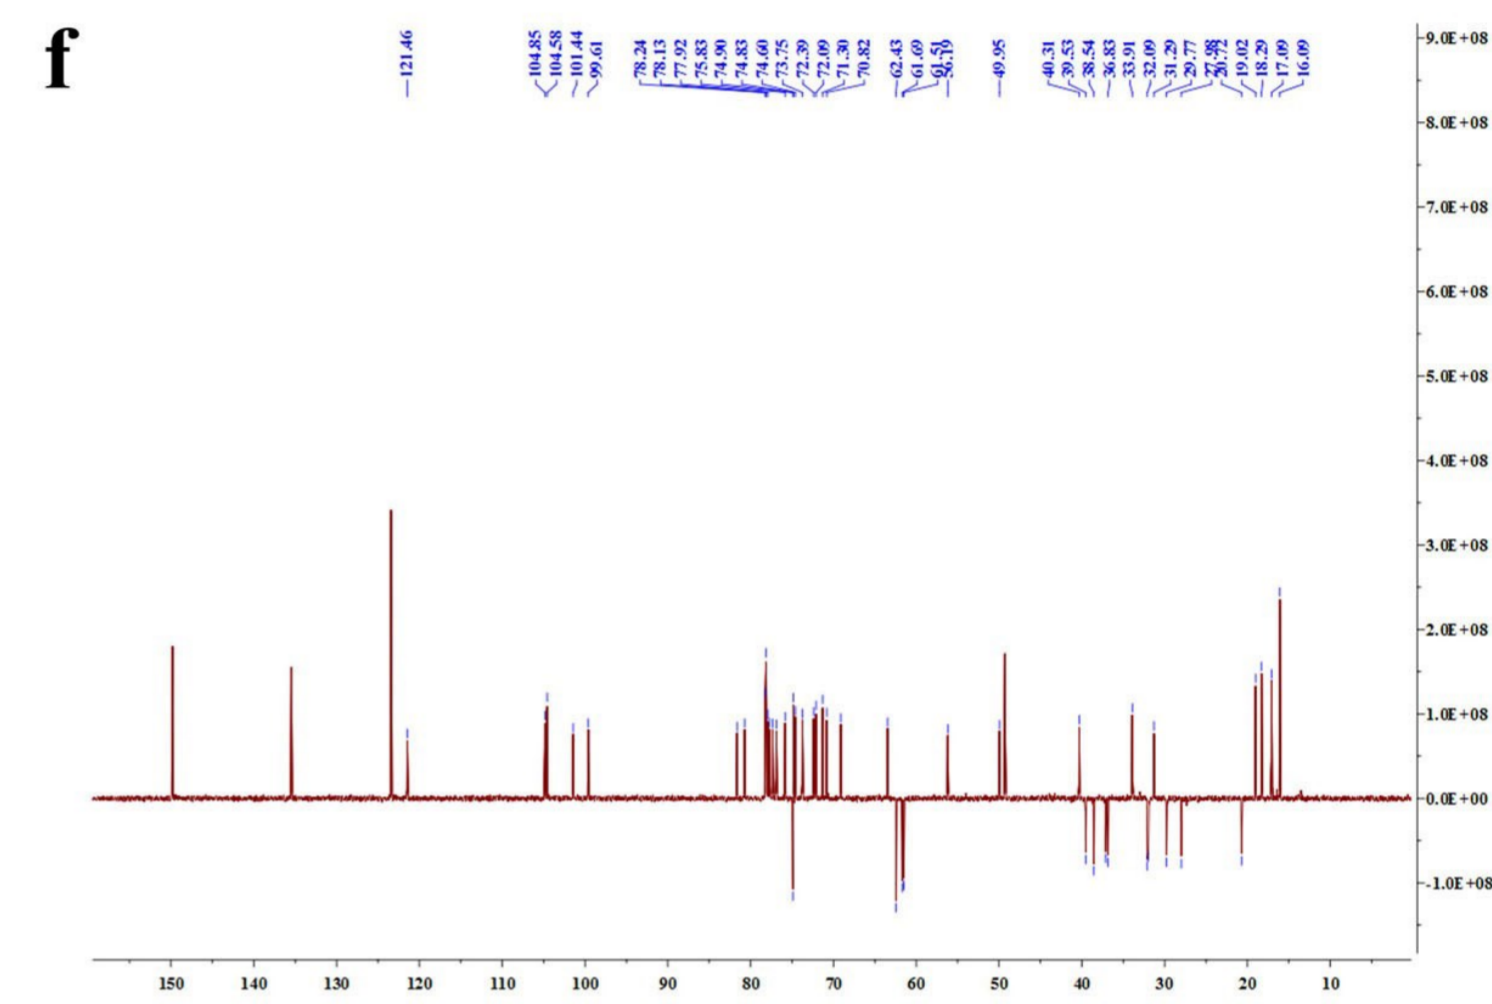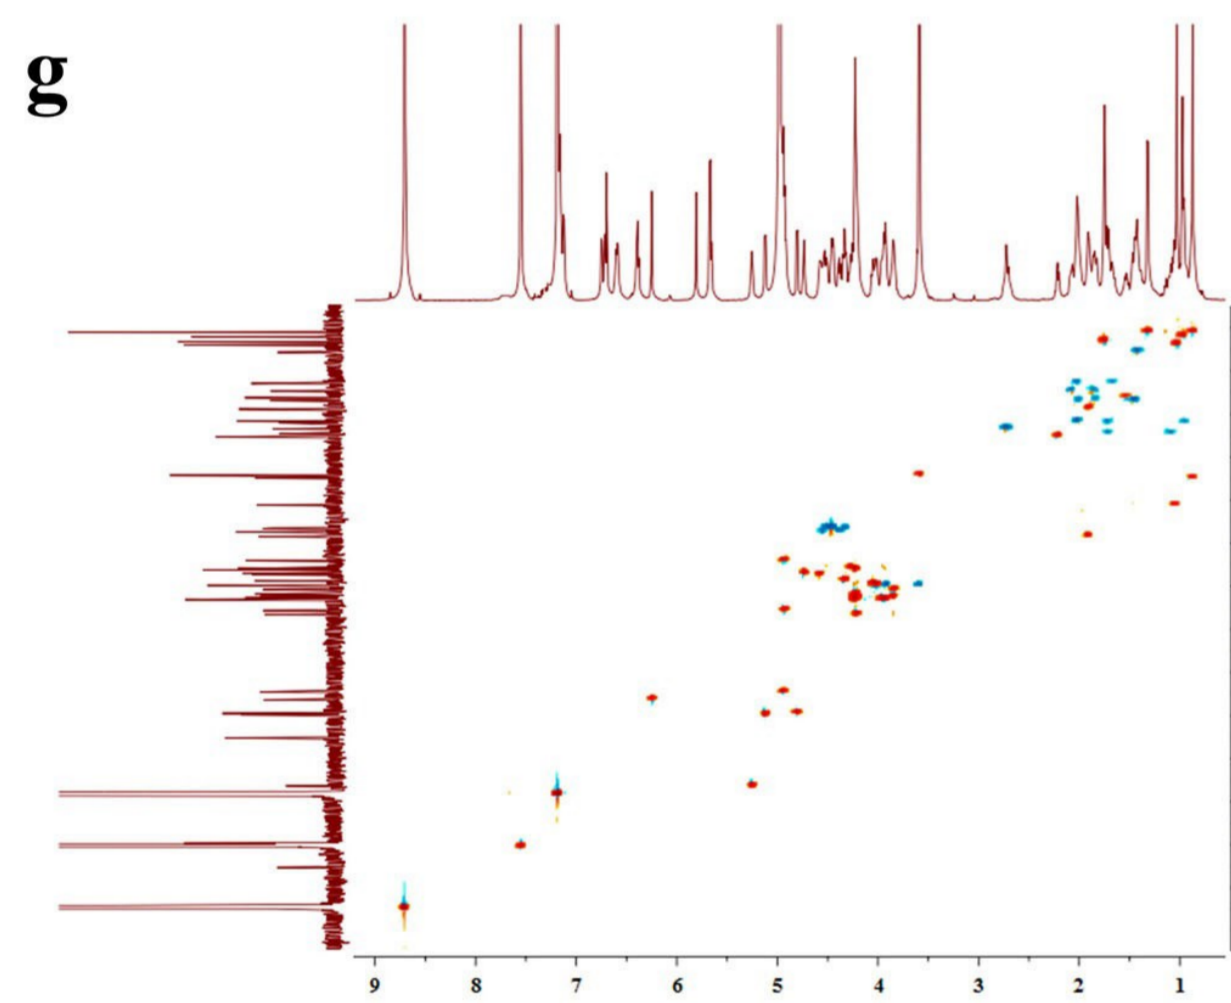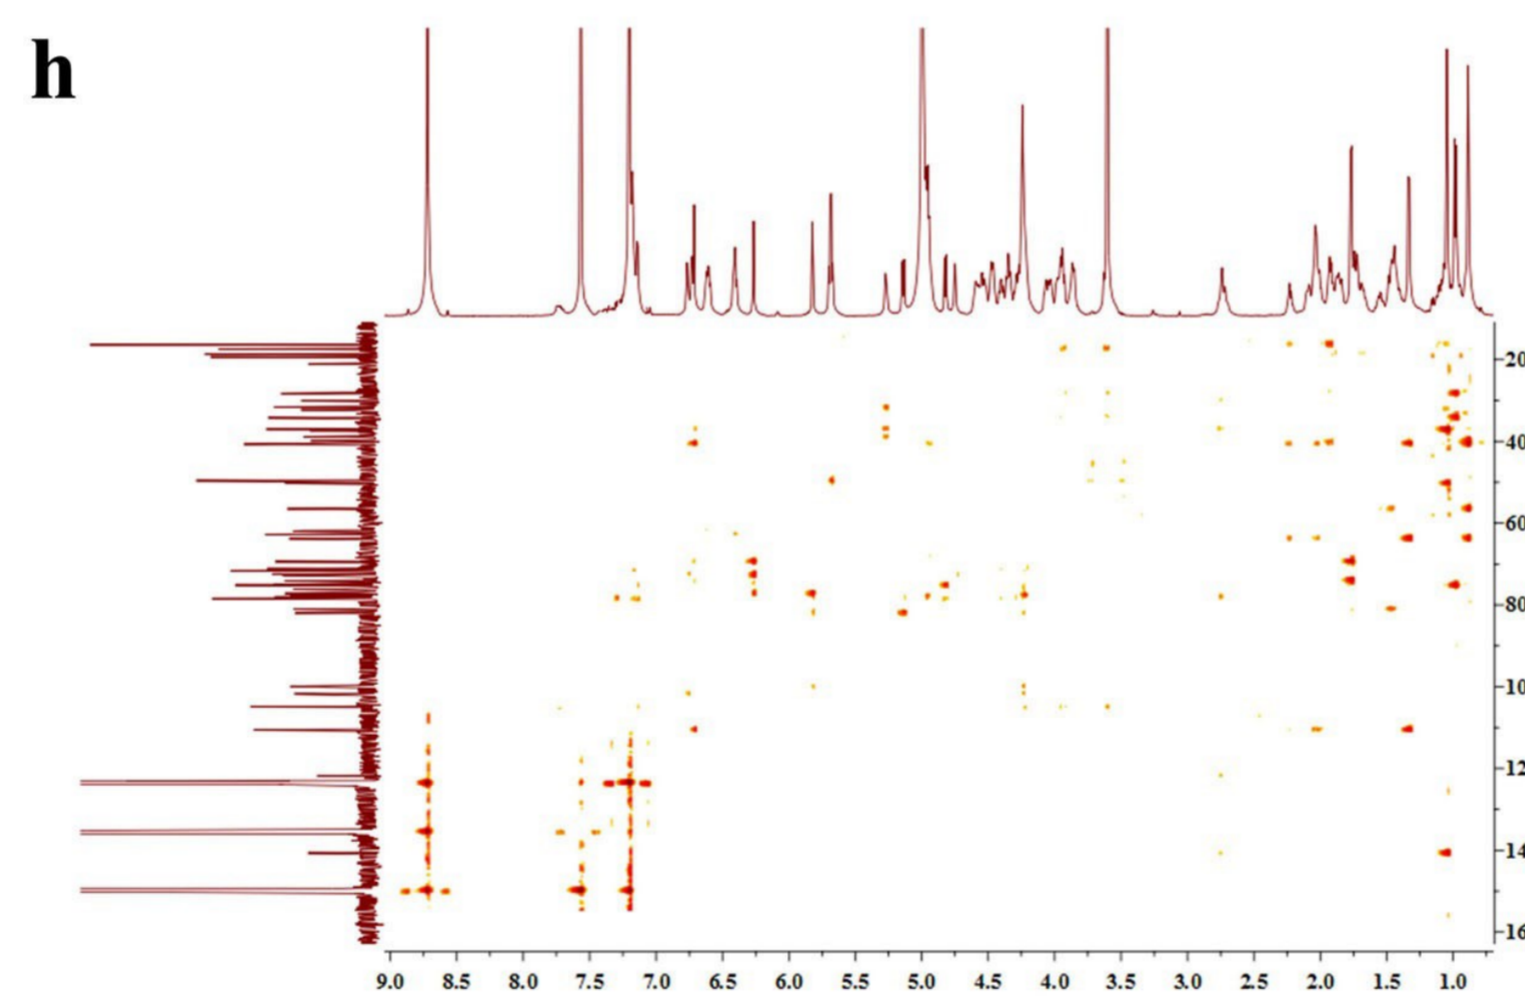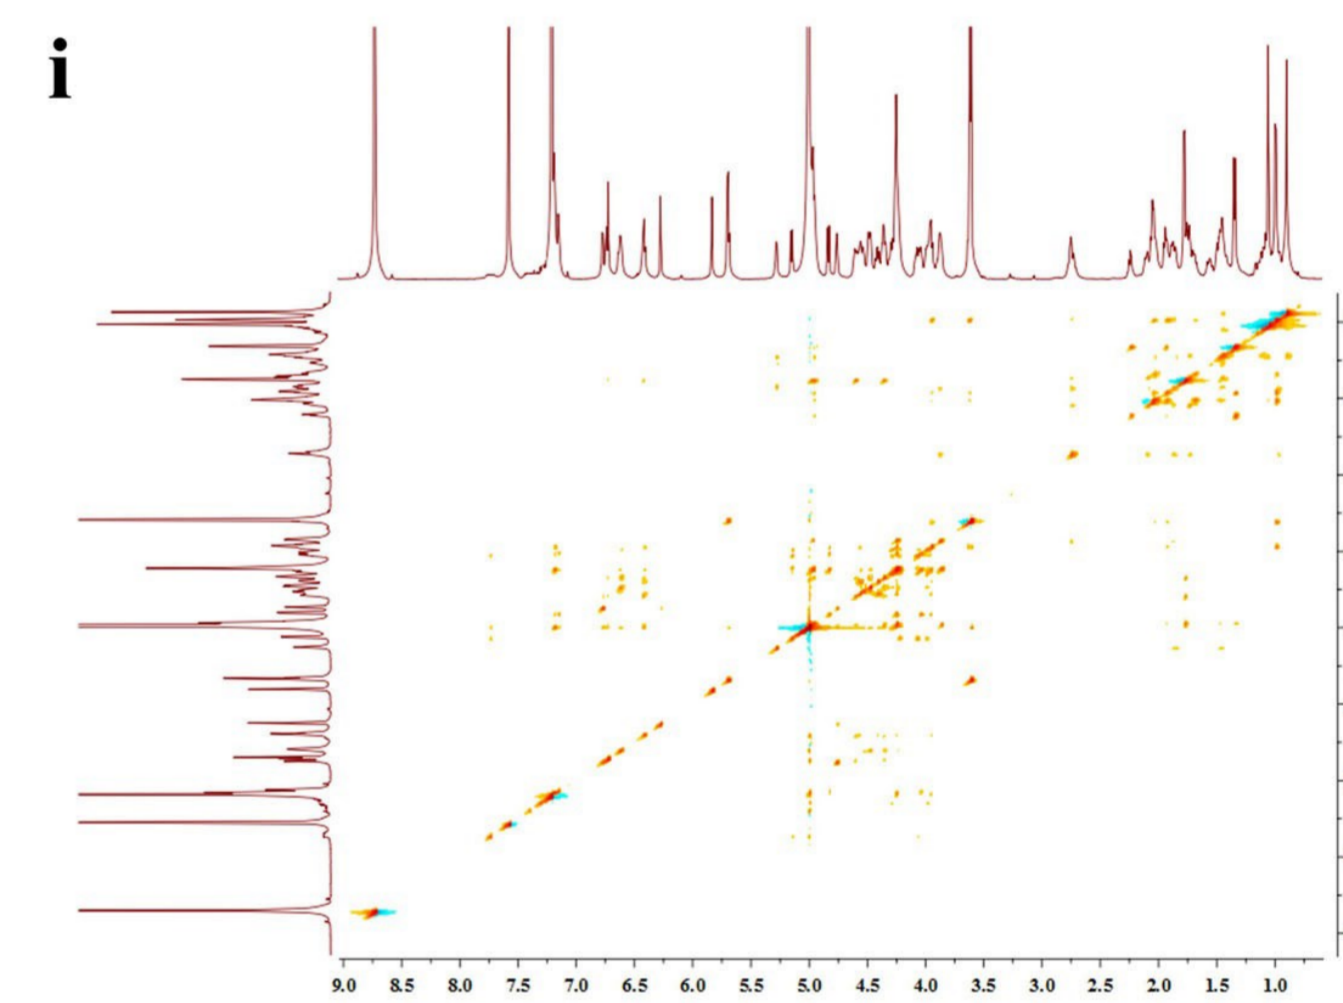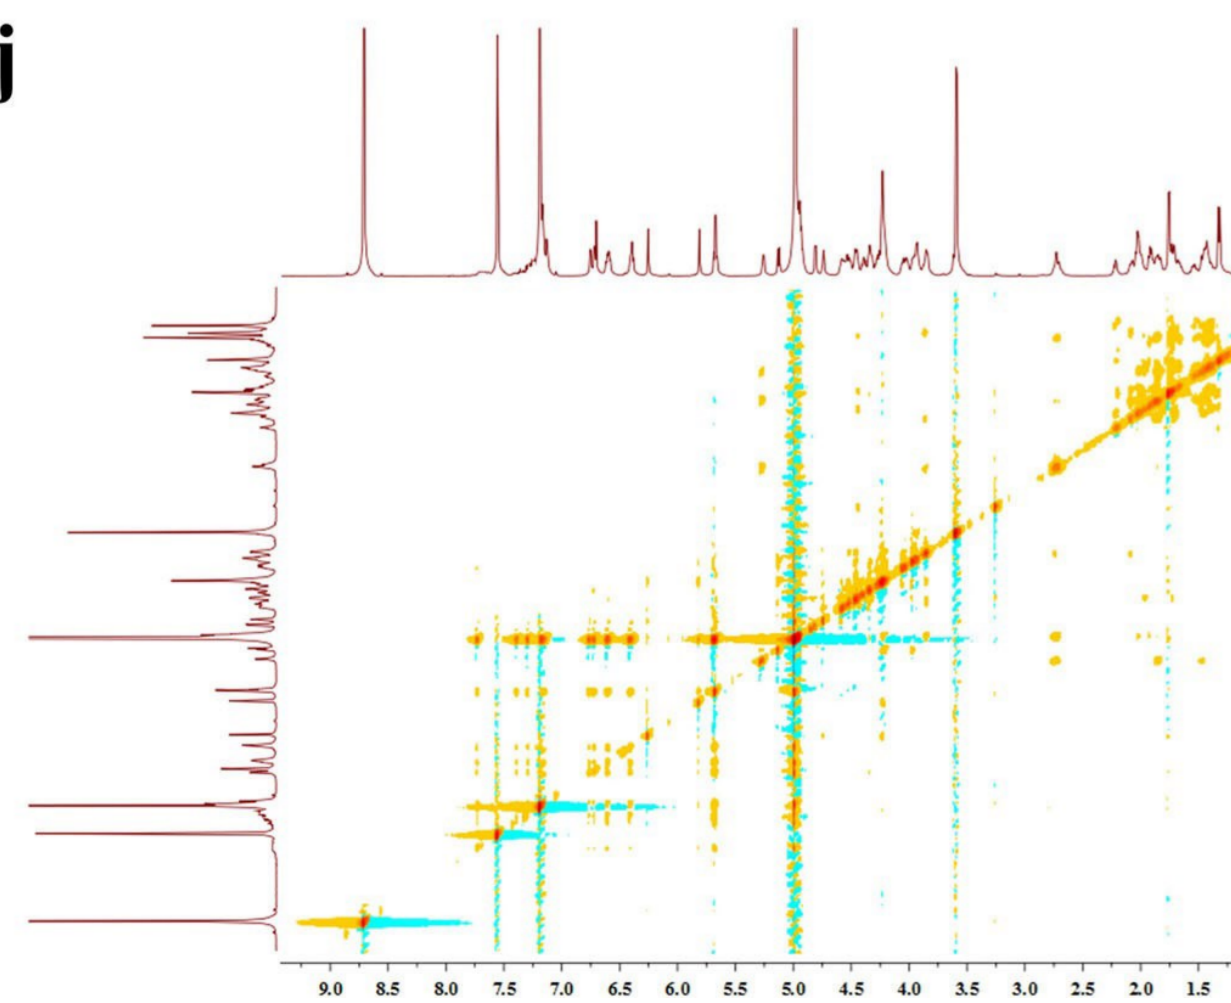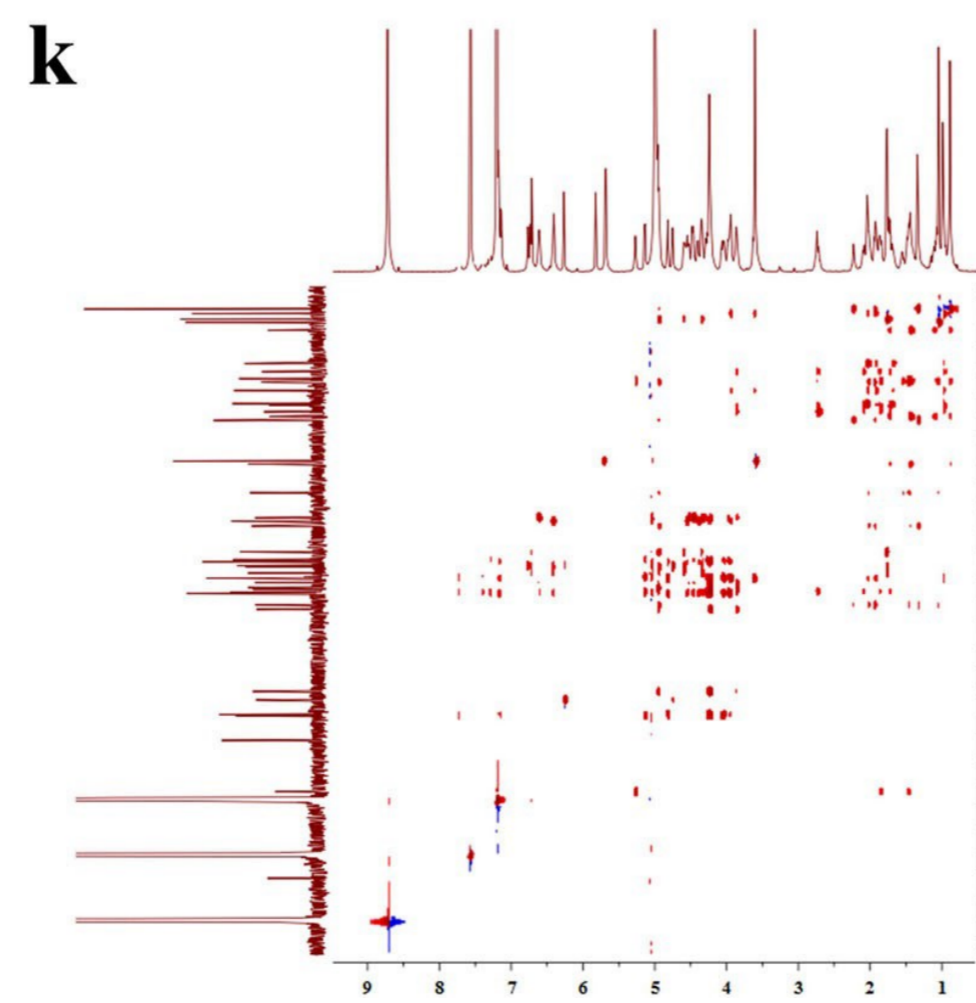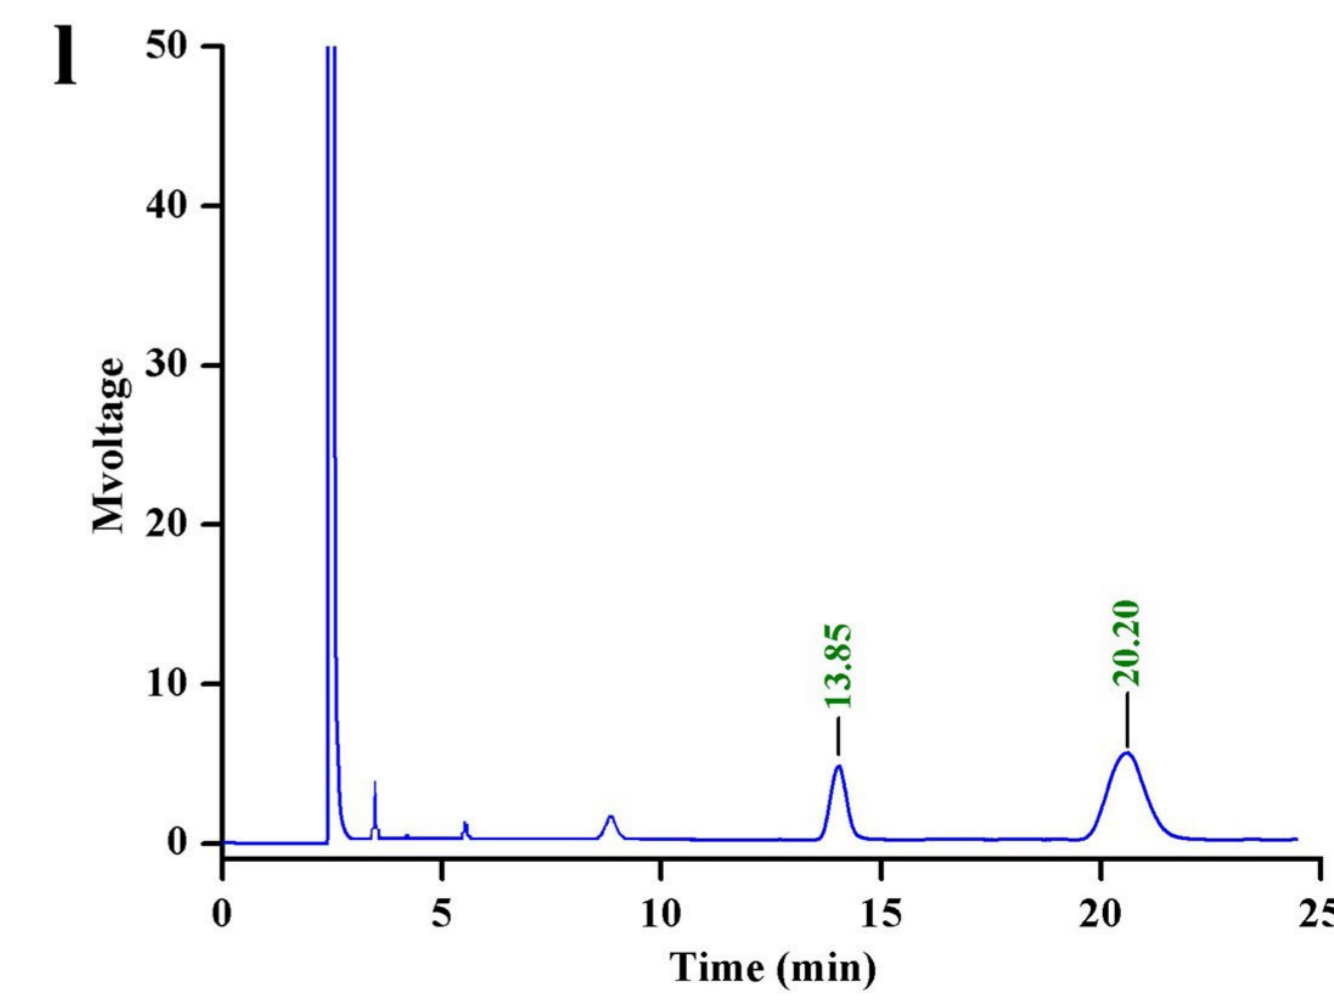

Supplement: d1fo01301g8.pdf [file d1fo01301g8.pdf]

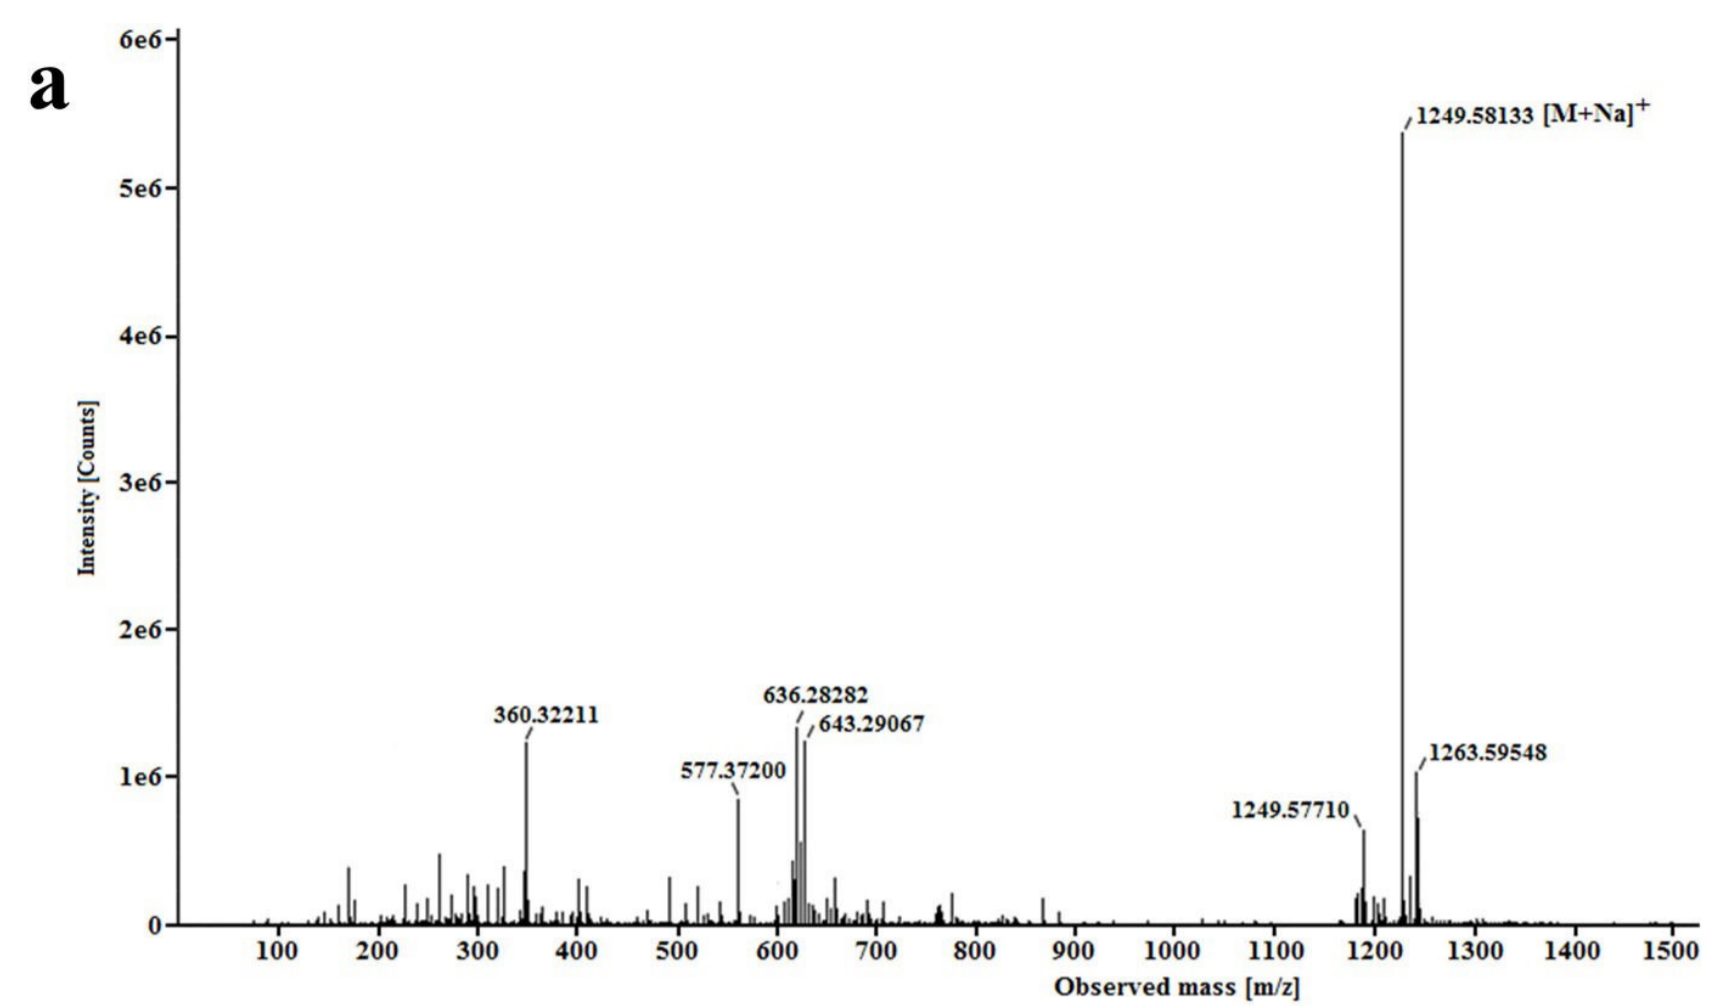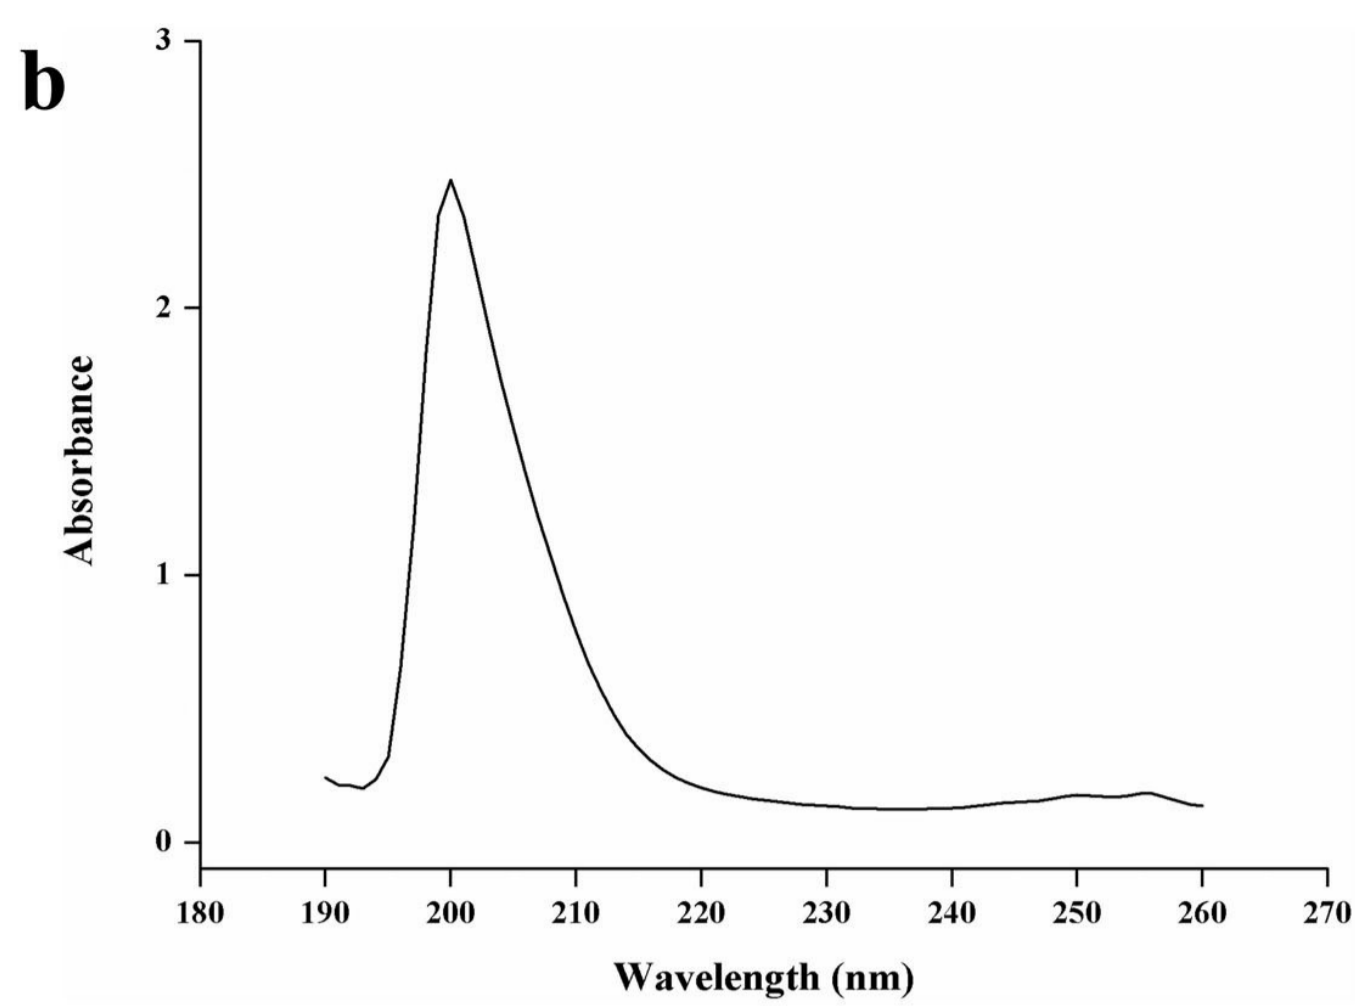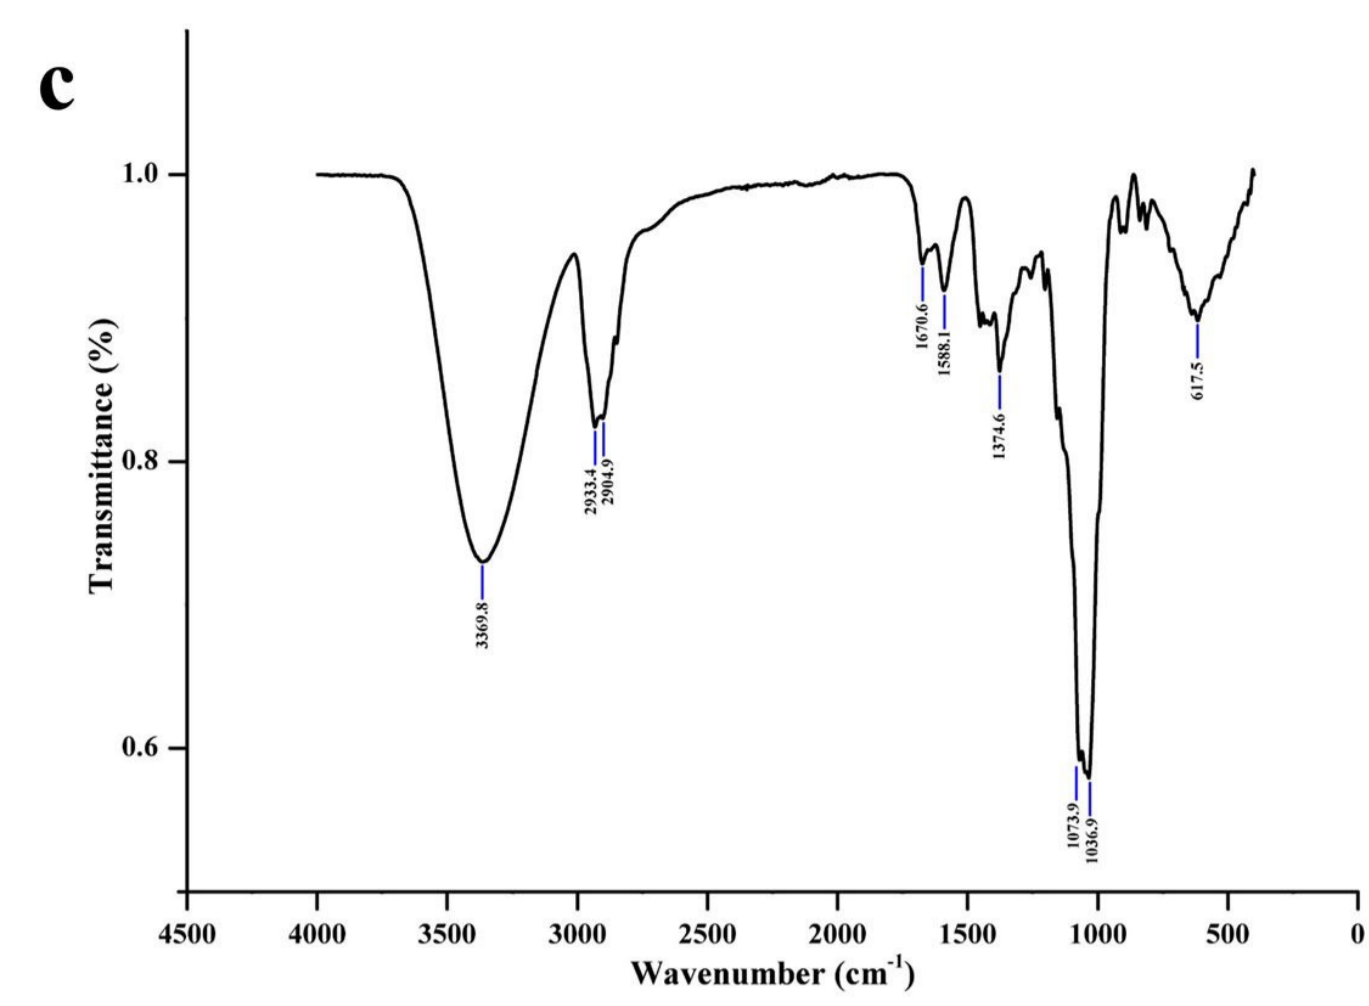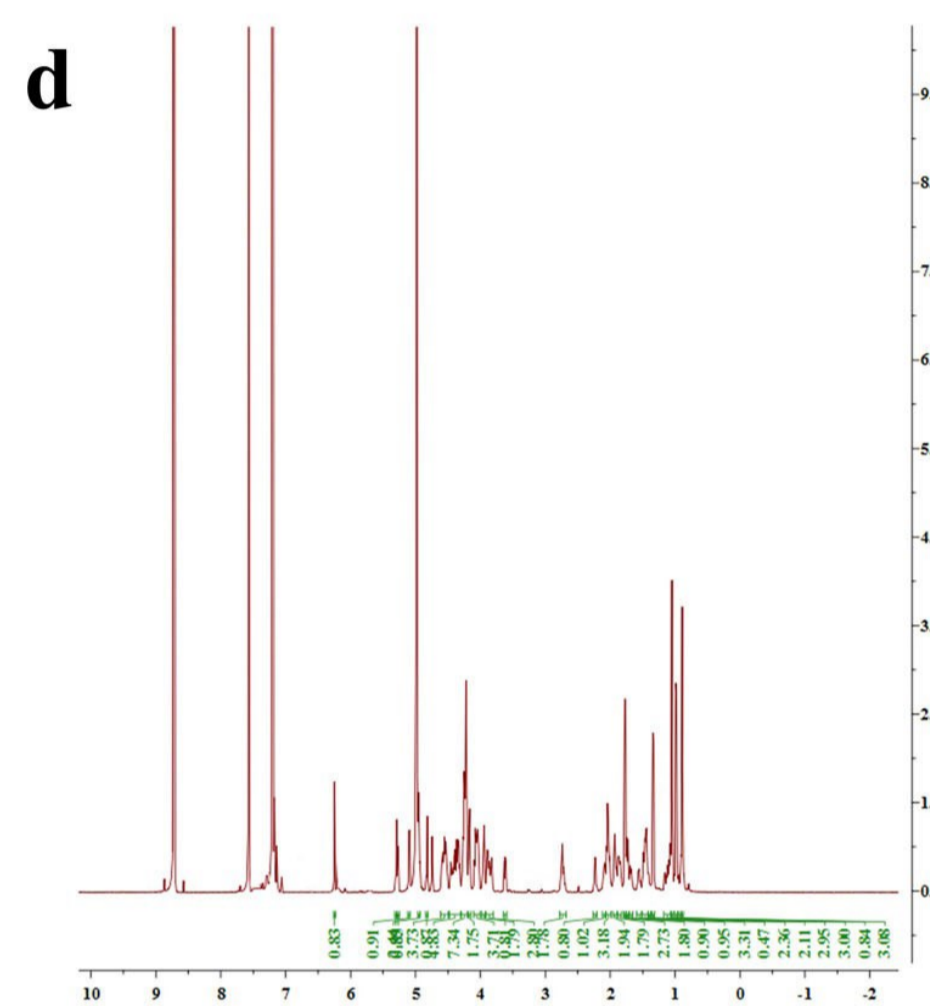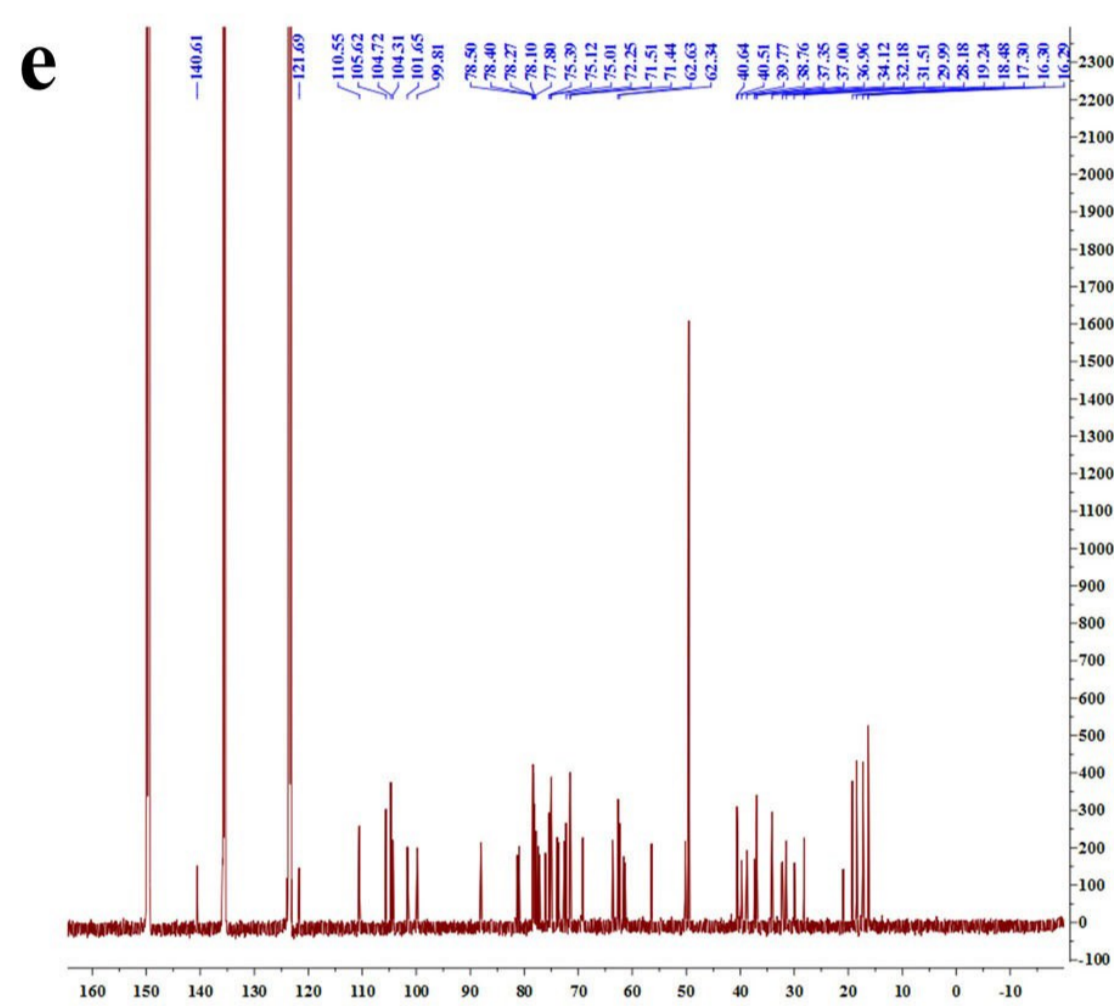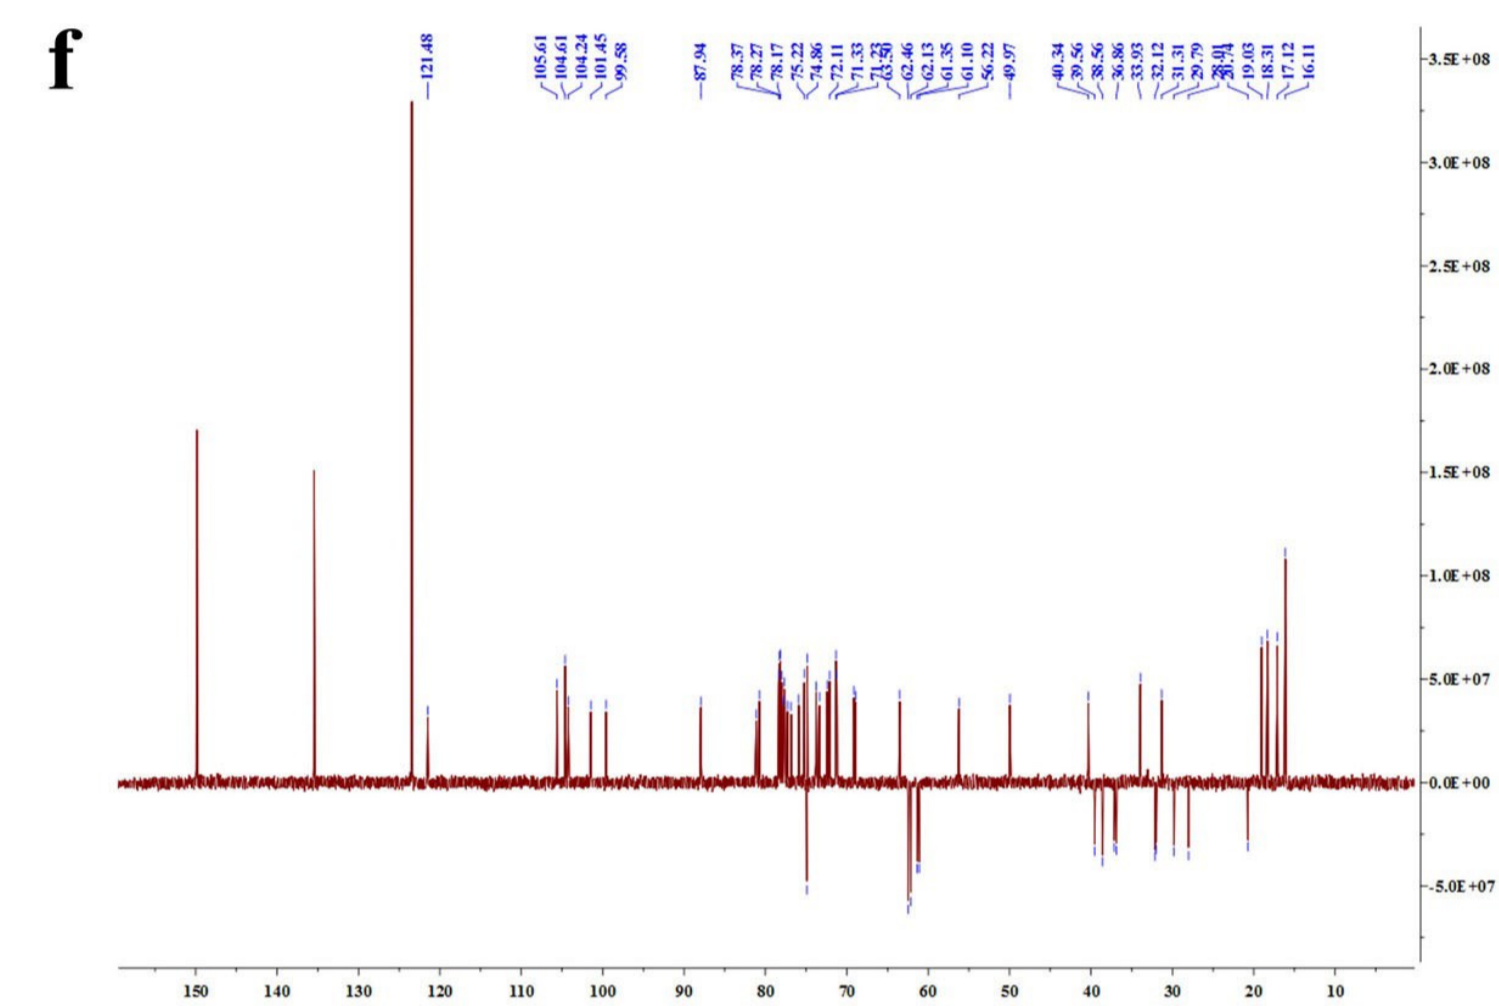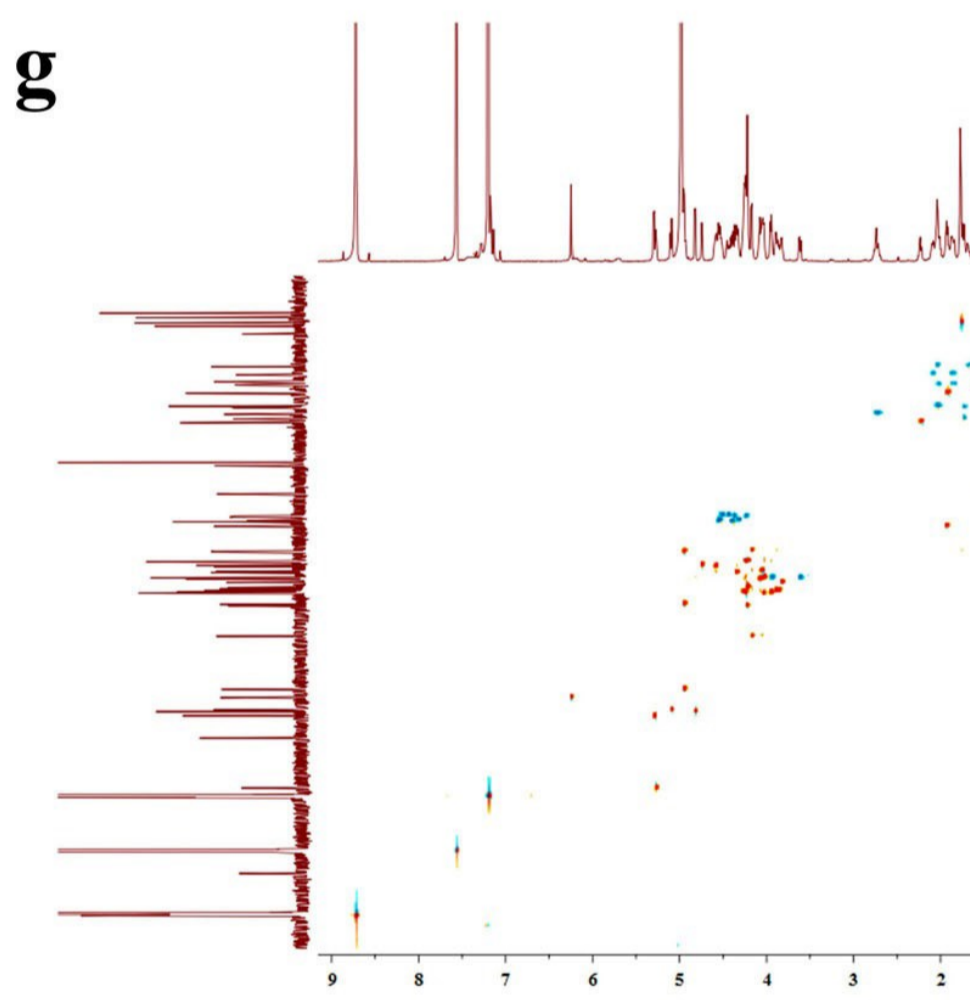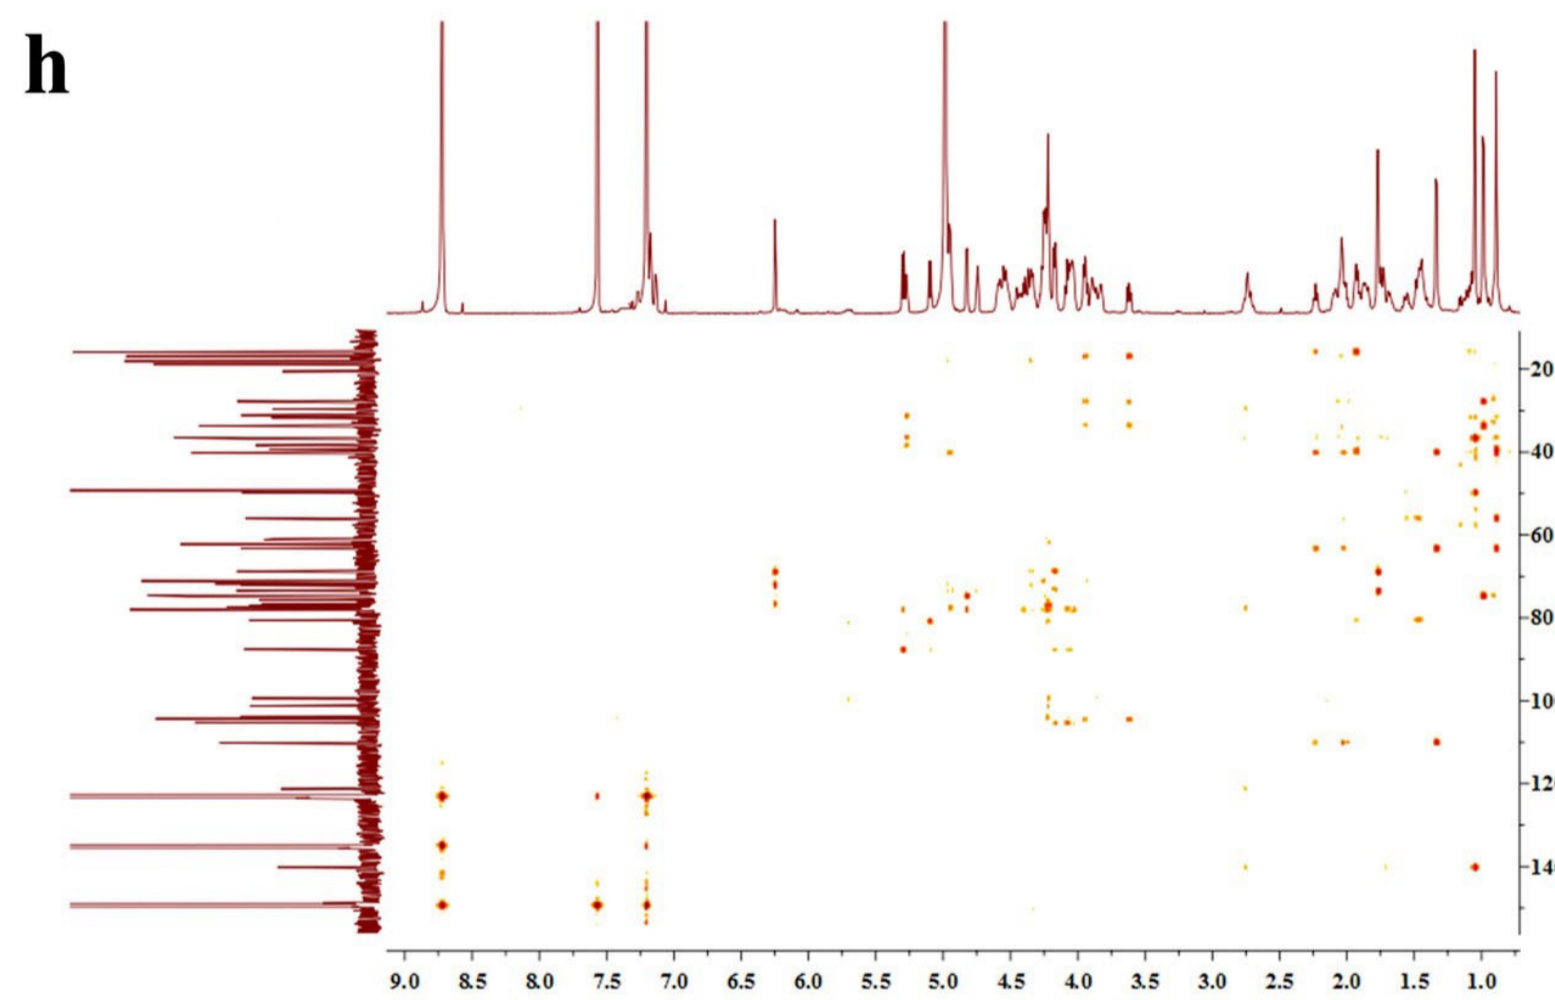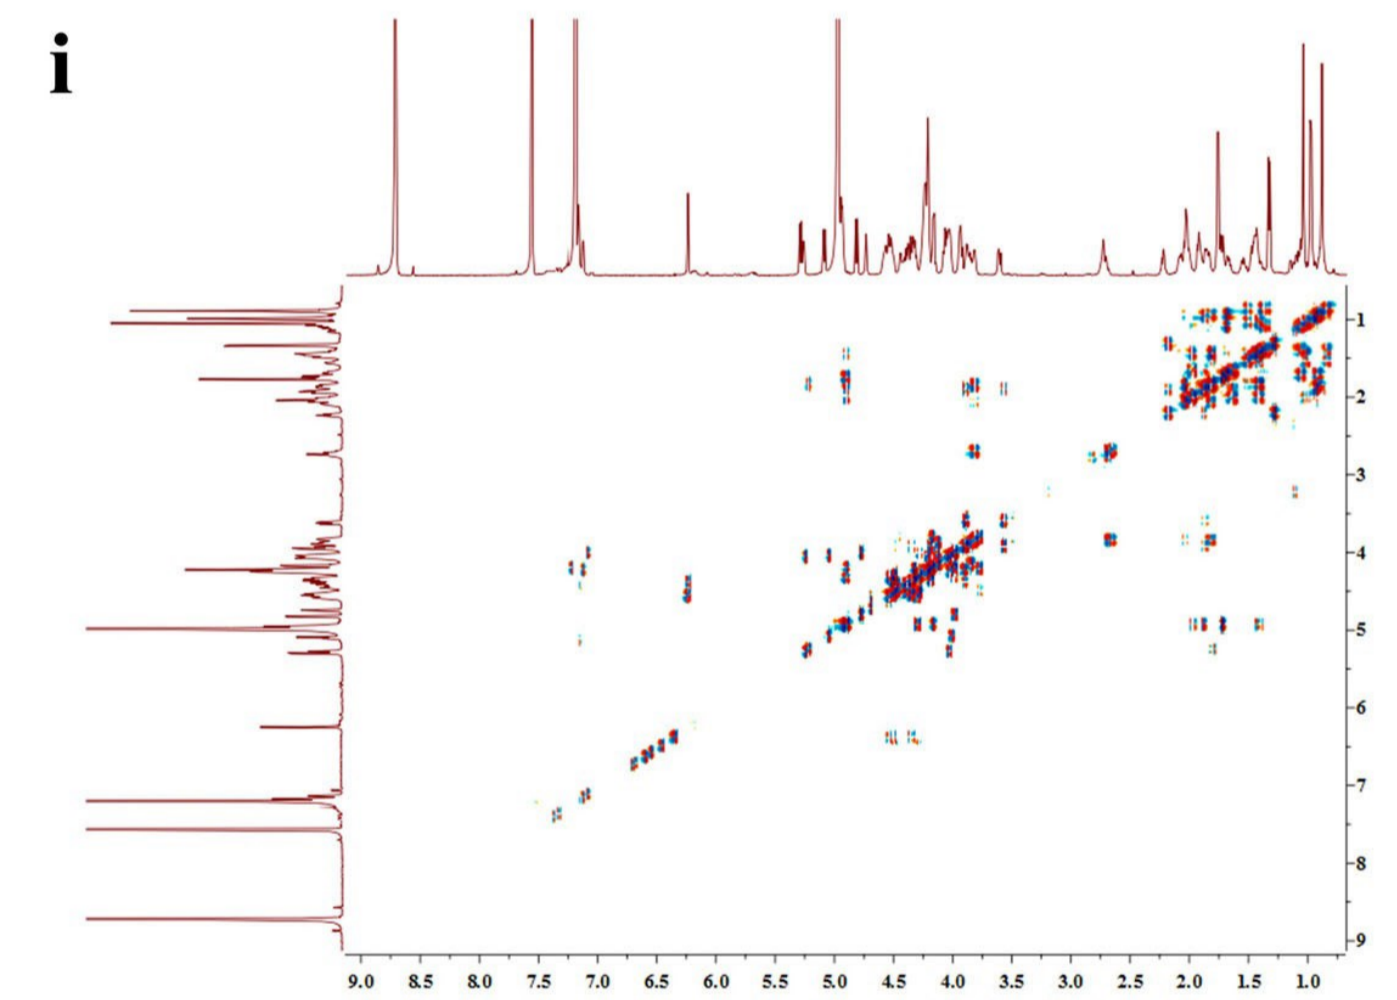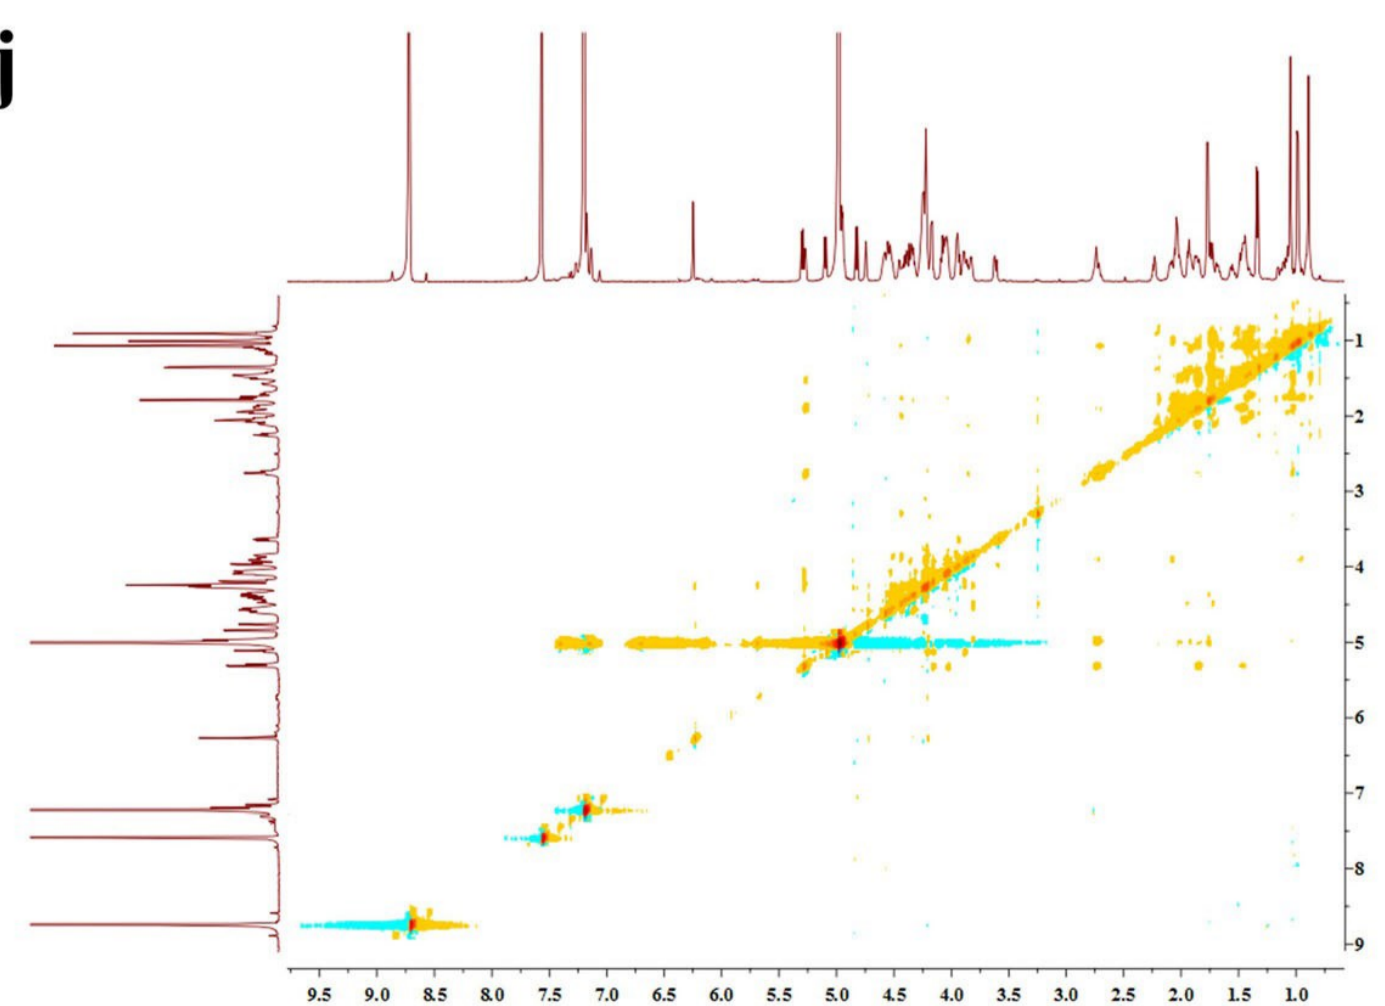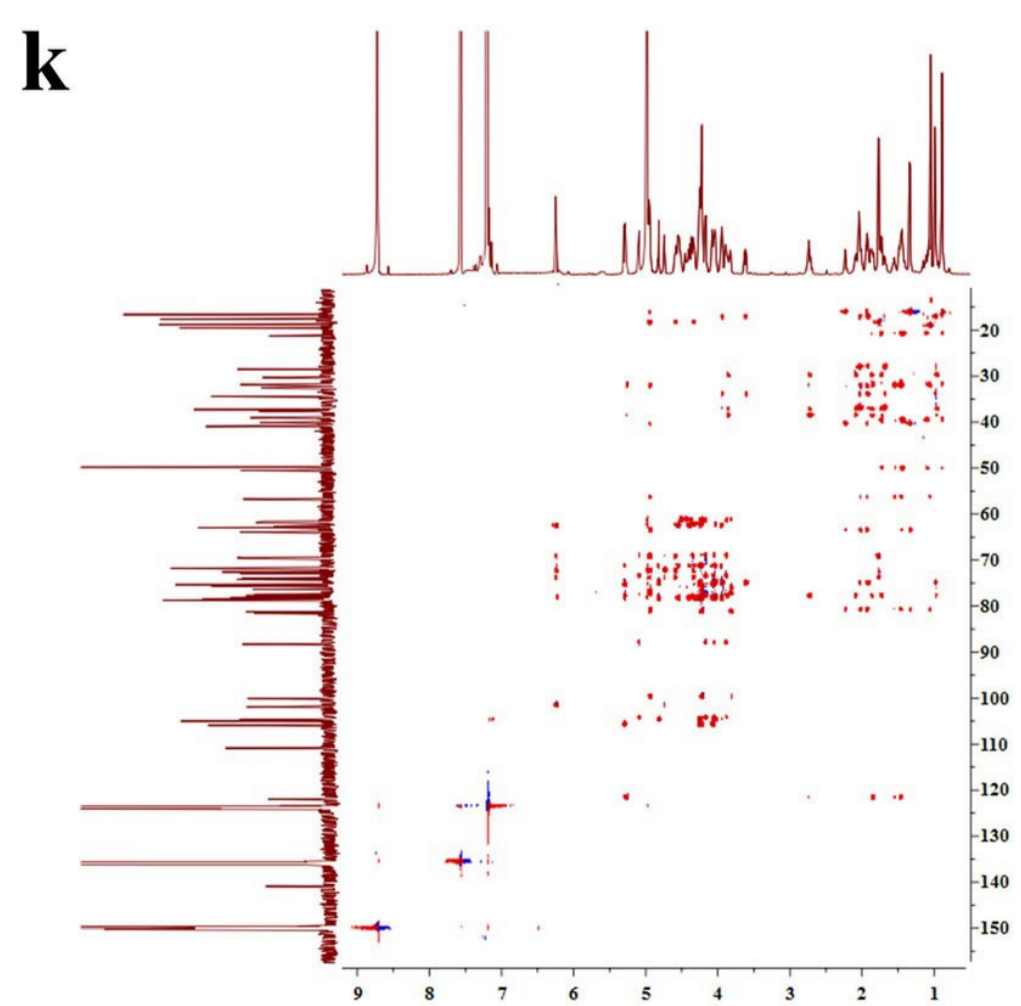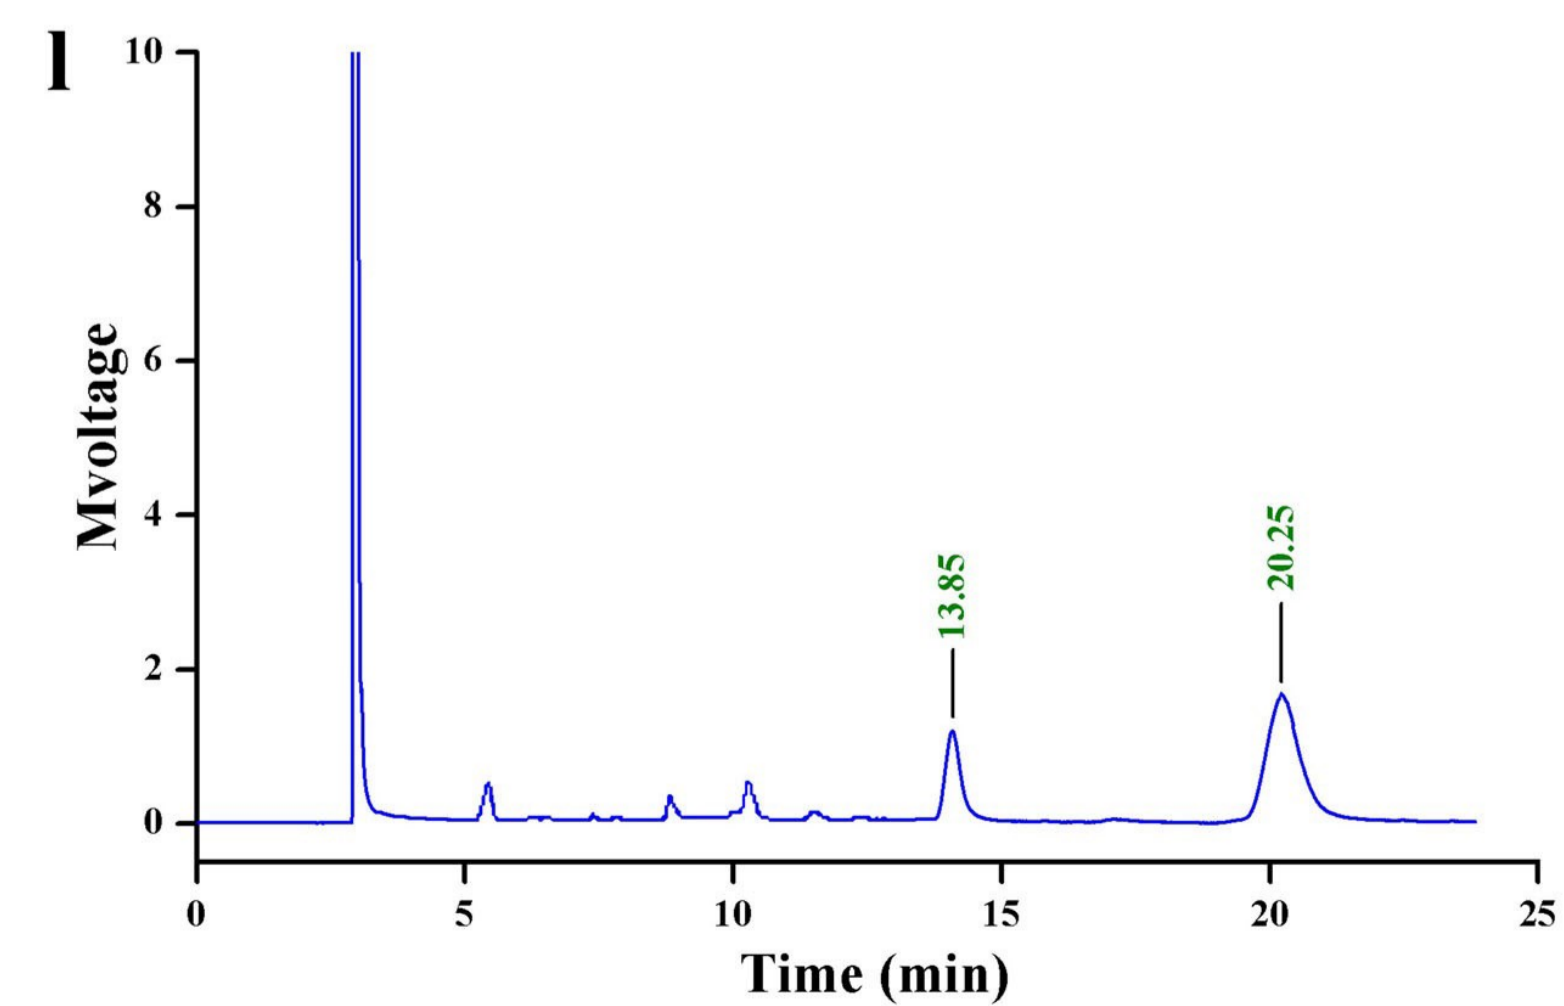

Supplement: d1fo01301g9.pdf [file d1fo01301g9.pdf]
